# Supplementary material
Source: MDPI journal article supplement (https://www.mdpi.com/2624-8549/2/2/32)
Supplement: s1 [file s1]

## Support Information

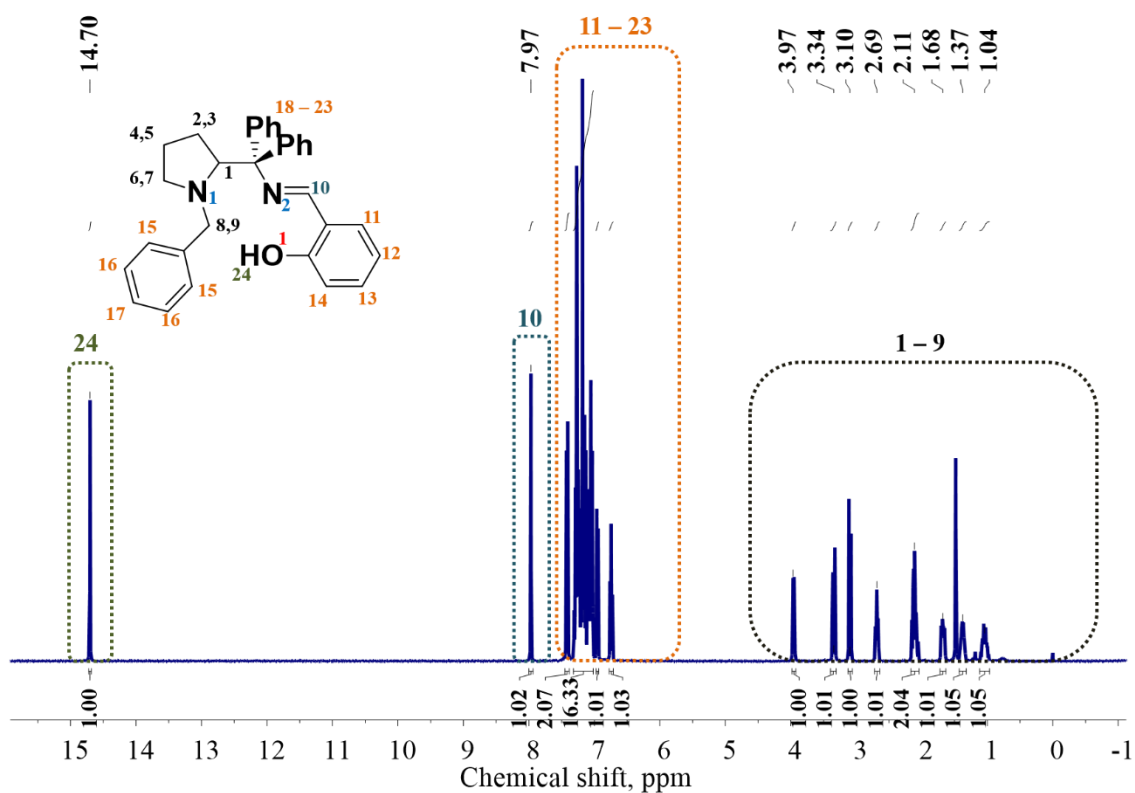

**Figure S1.** <sup>1</sup>H NMR spectrum of HL1 in CDCl<sub>3</sub> at room temperature.

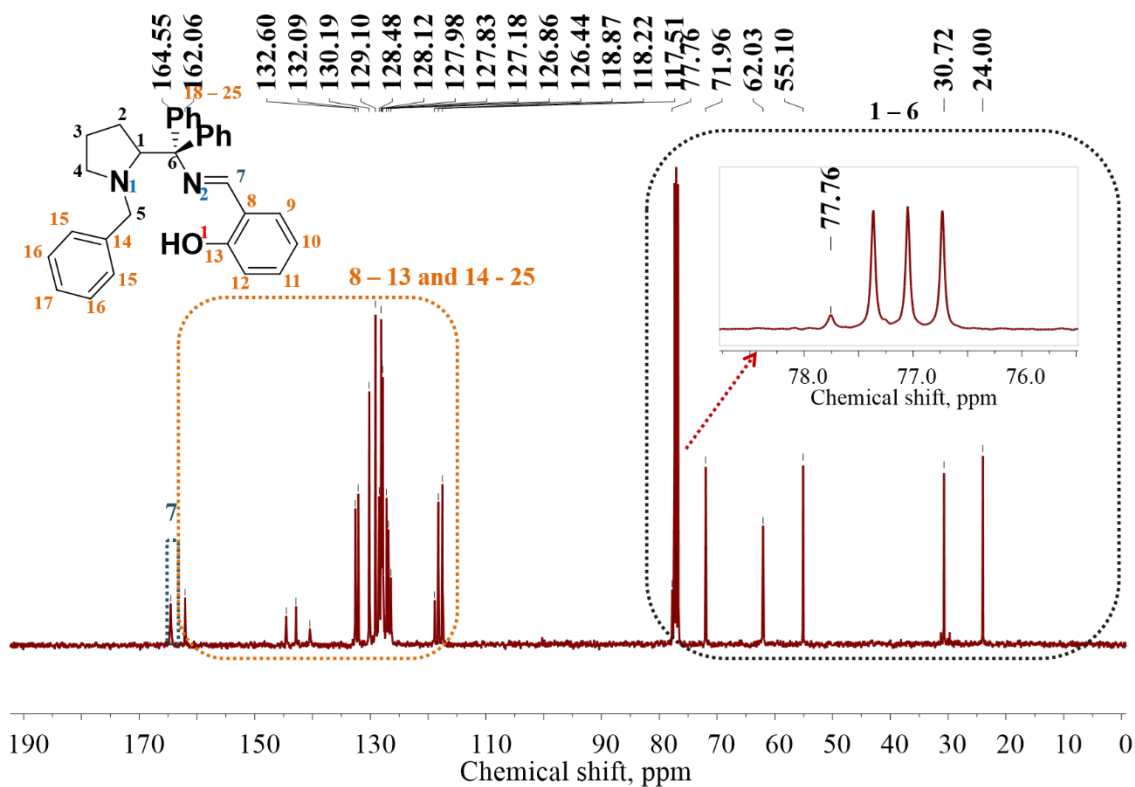

**Figure S2.** <sup>13</sup>C NMR Spectrum of HL1 in CDCl<sub>3</sub> at room temperature.

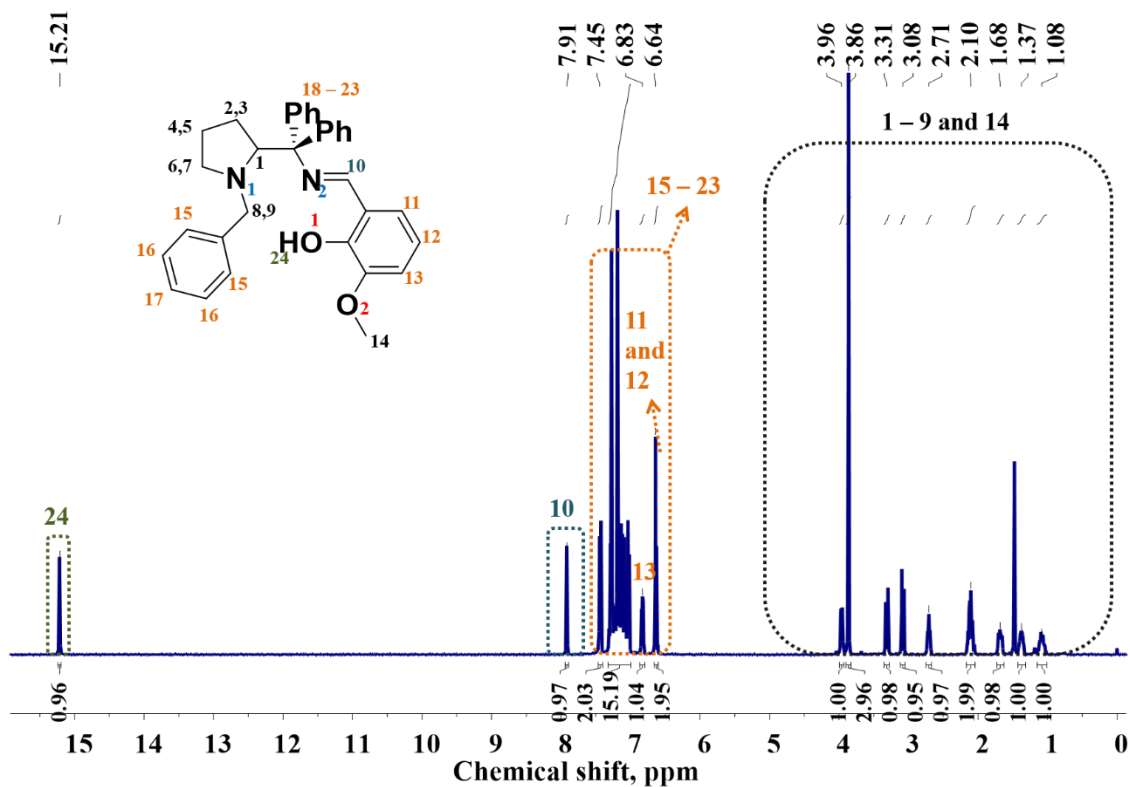

Figure S3. <sup>1</sup>H NMR spectrum of HL2 in CDCl<sub>3</sub> at room temperature.

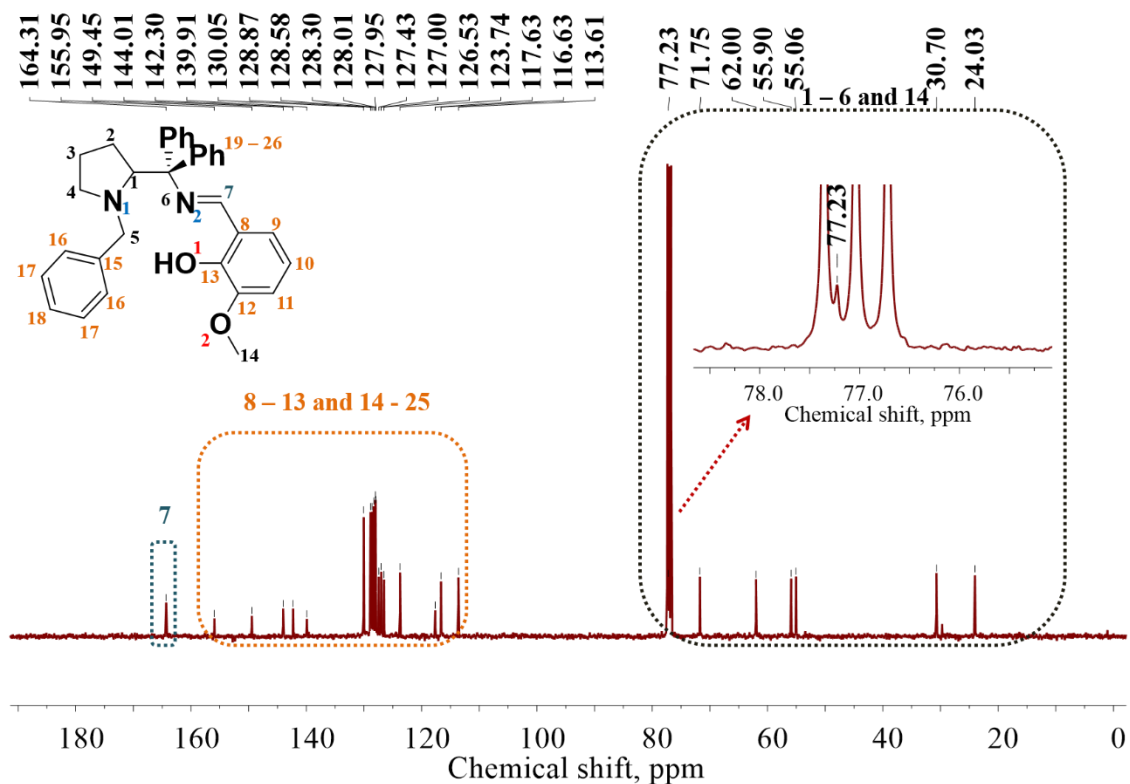

Figure S4. <sup>13</sup>C NMR spectrum of HL2 in CDCl<sub>3</sub> at room temperature.

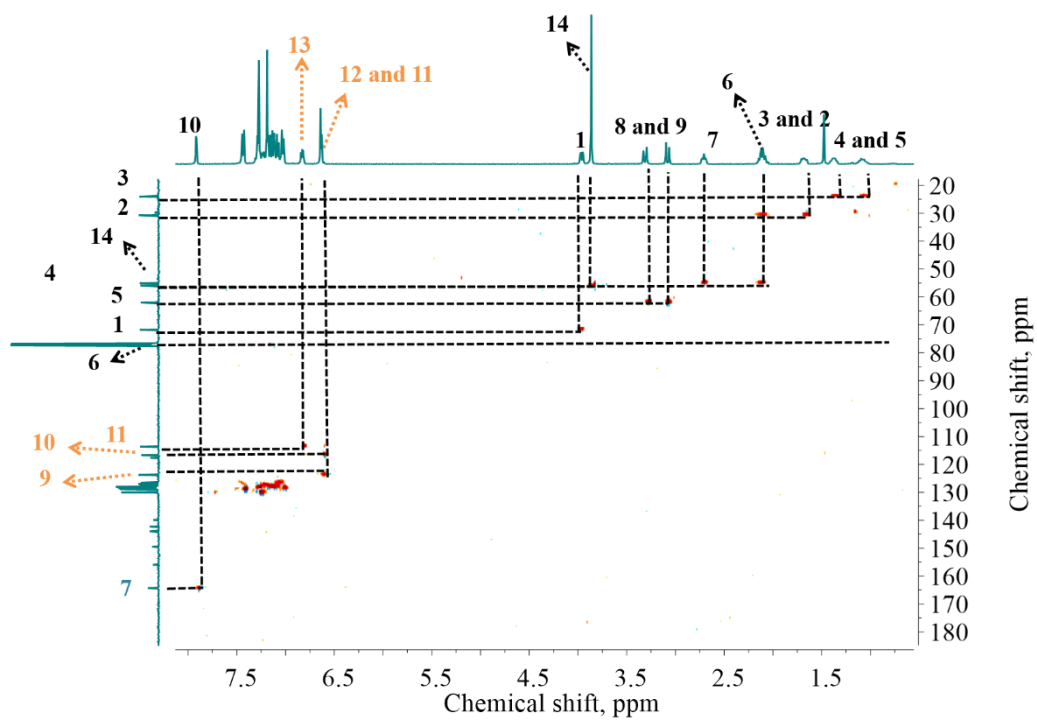

**Figure S5.**HSQC NMR spectrum of HL2 in  $\text{CDCl}_3$  at room temperature.

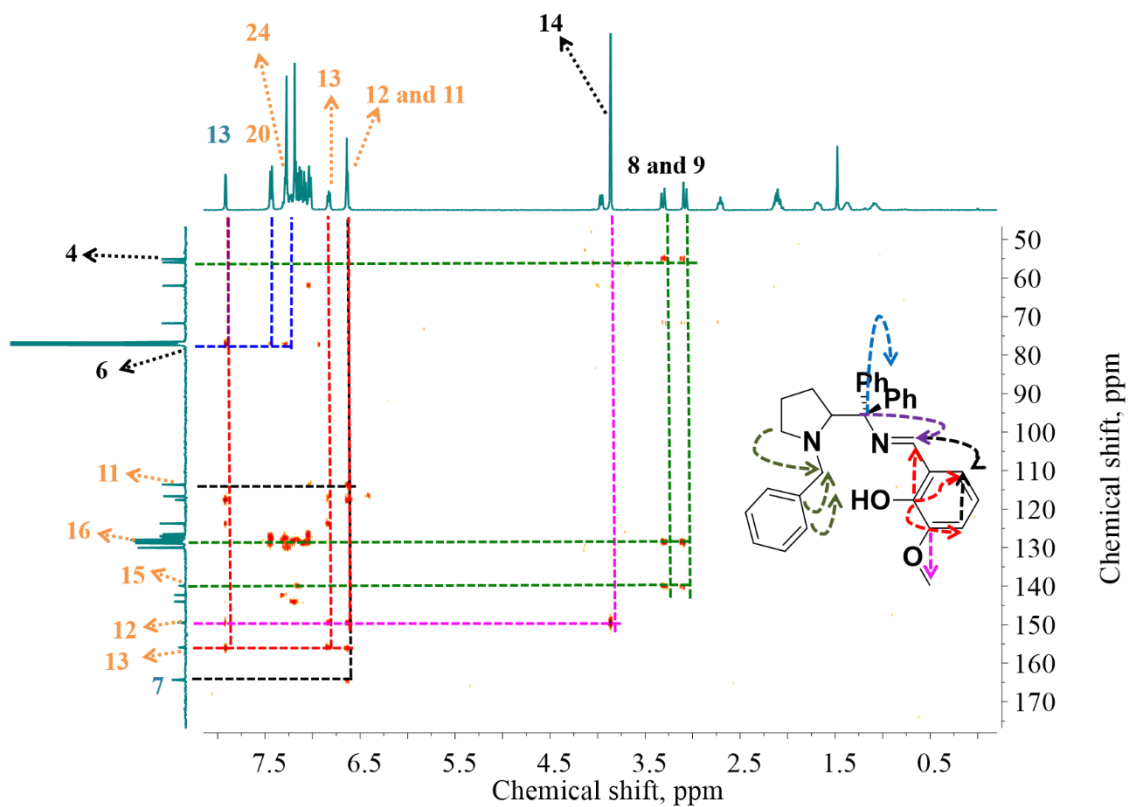

**Figure S6.**HMBC NMR spectrum of HL2 in  $\text{CDCl}_3$  at room temperature.

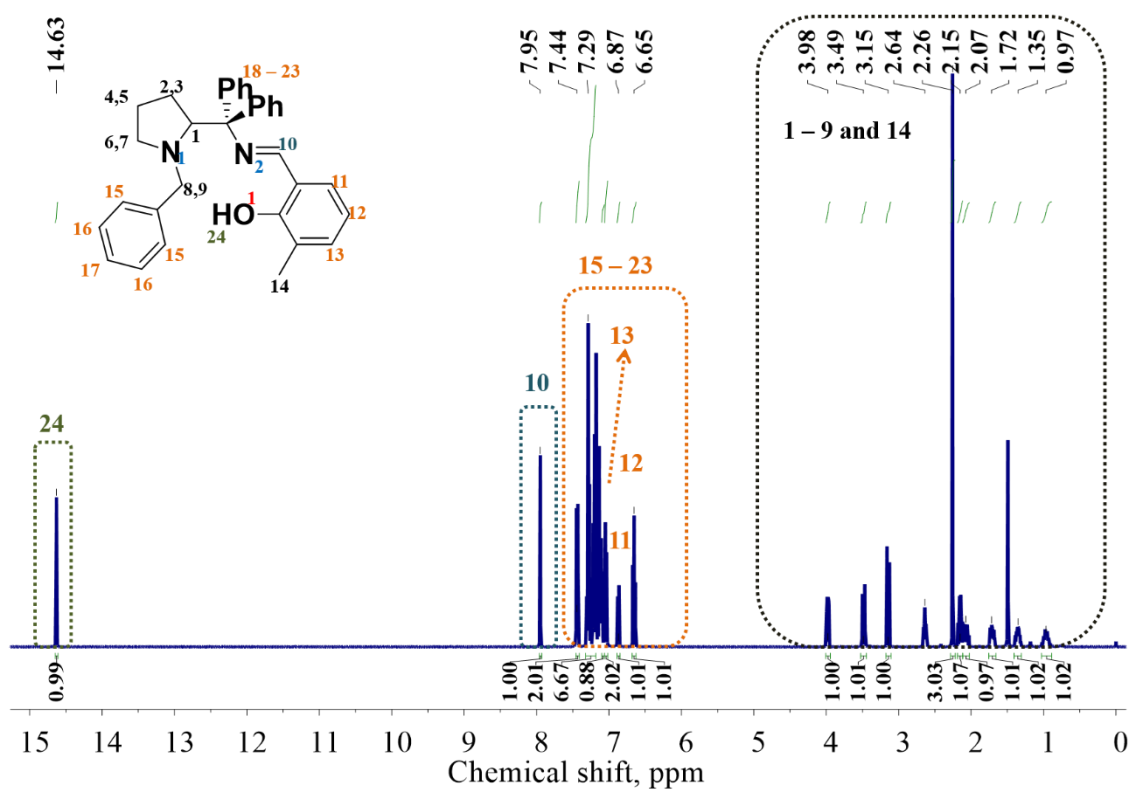

**Figure S7.**  $^1\text{H}$ NMR spectrum of HL3 in CDCl<sub>3</sub> at room temperature.

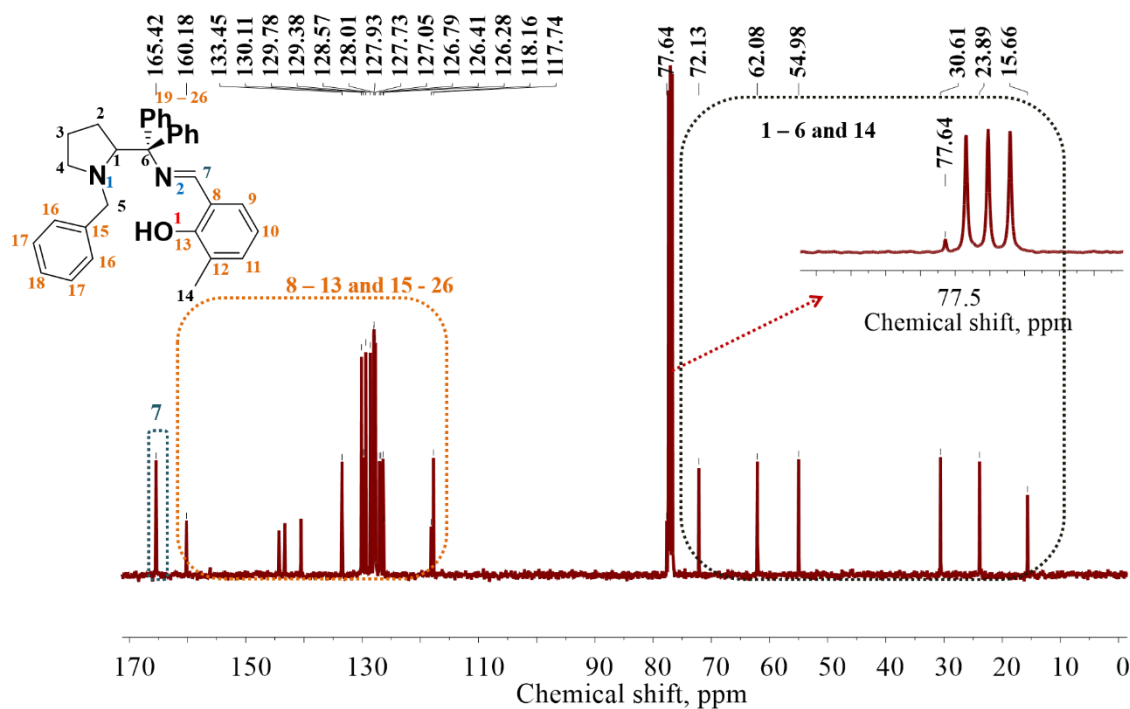

**Figure S8.**  $^{13}\text{C}$ NMR spectrum of HL3 in CDCl<sub>3</sub> at room temperature.

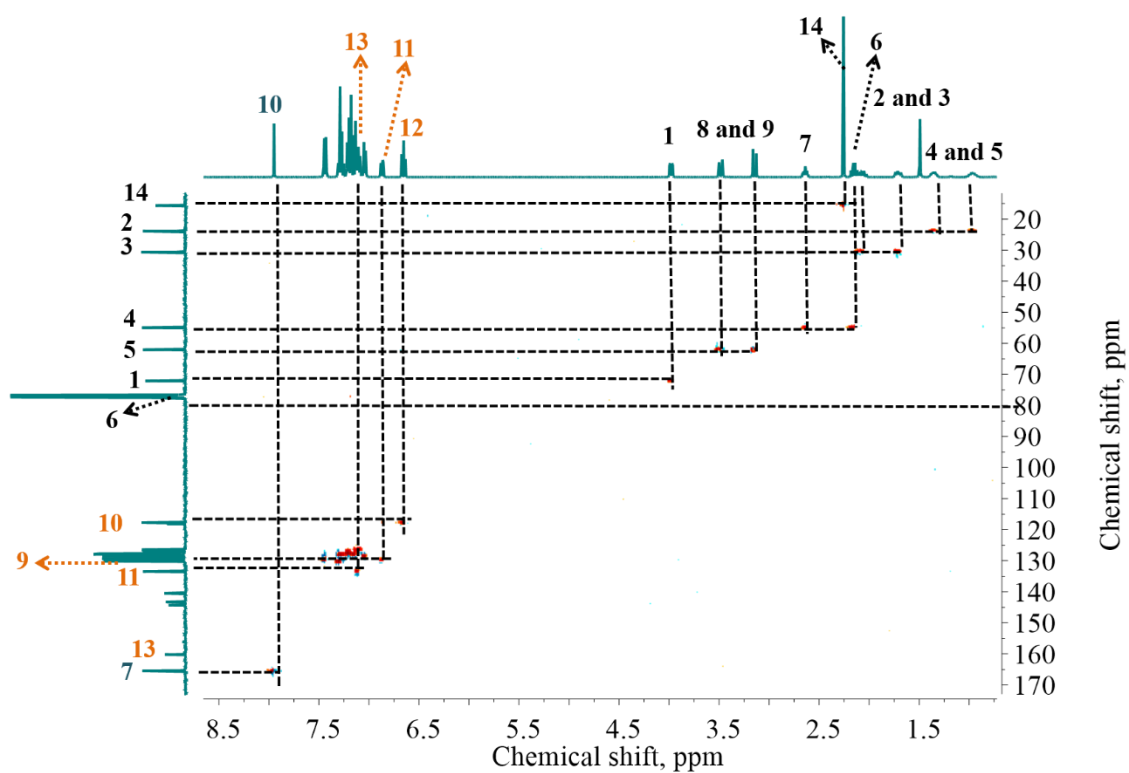

**Figure S9.**HSQC NMR spectrum of HL3 in  $\text{CDCl}_3$  at room temperature.

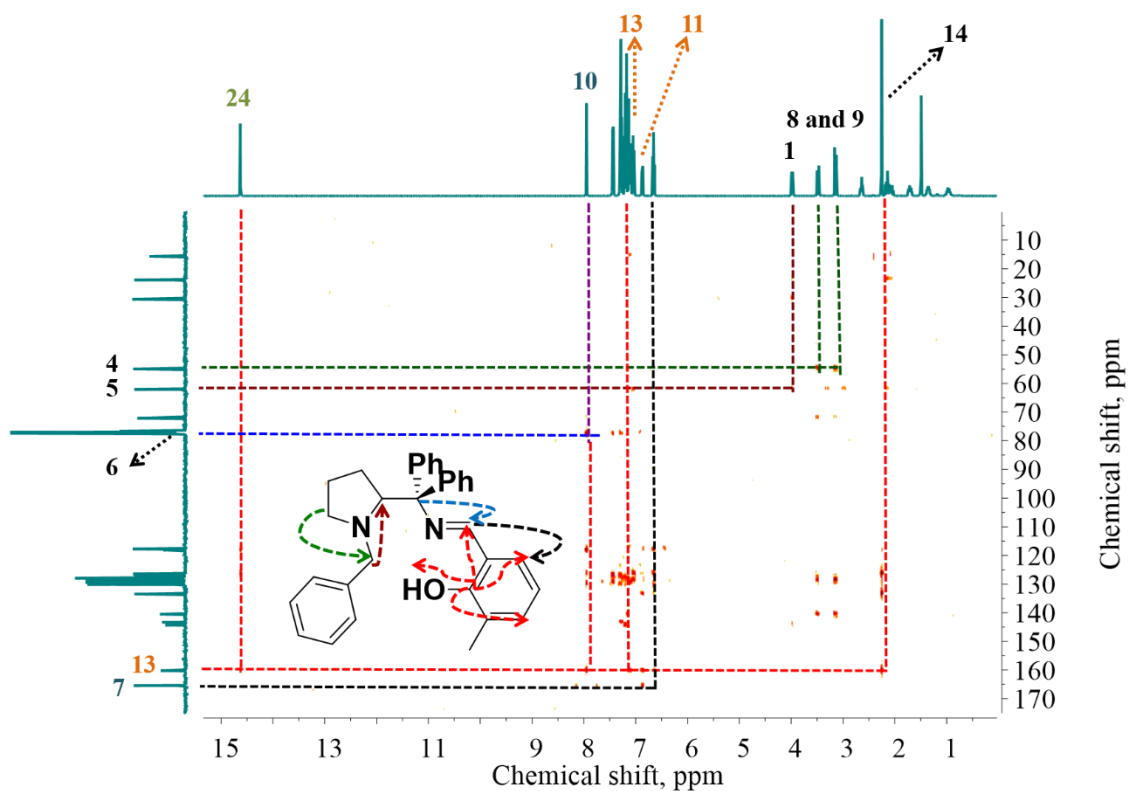

**Figure S10.**HMBC NMR spectrum of HL3 in  $\text{CDCl}_3$  at room temperature.

**Figure S11.** Spectra RMN  $^1\text{H}$  of HL4 in  $\text{CDCl}_3$  at room temperature.

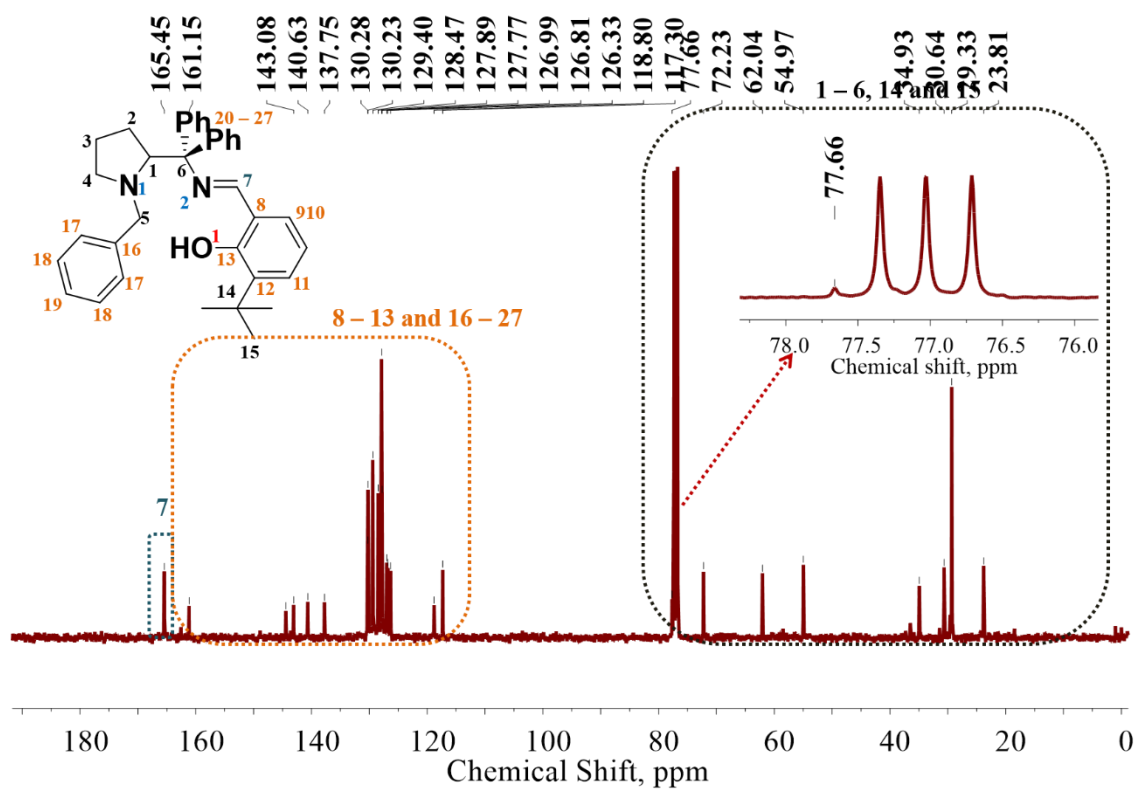

**Figure S12.**  $^{13}\text{C}$  NMR spectrum of HL4 in  $\text{CDCl}_3$  at room temperature.

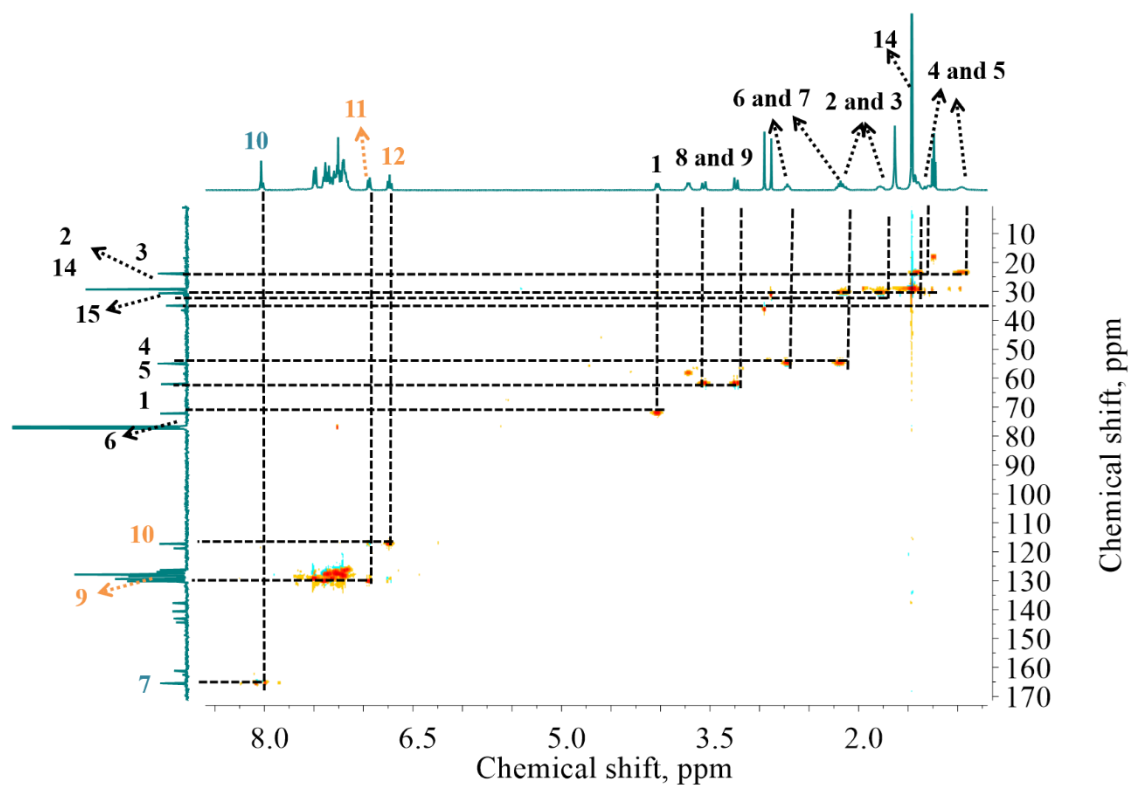

**Figure S13.** HSQC NMR spectrum of HL4 in  $\text{CDCl}_3$  at room temperature.

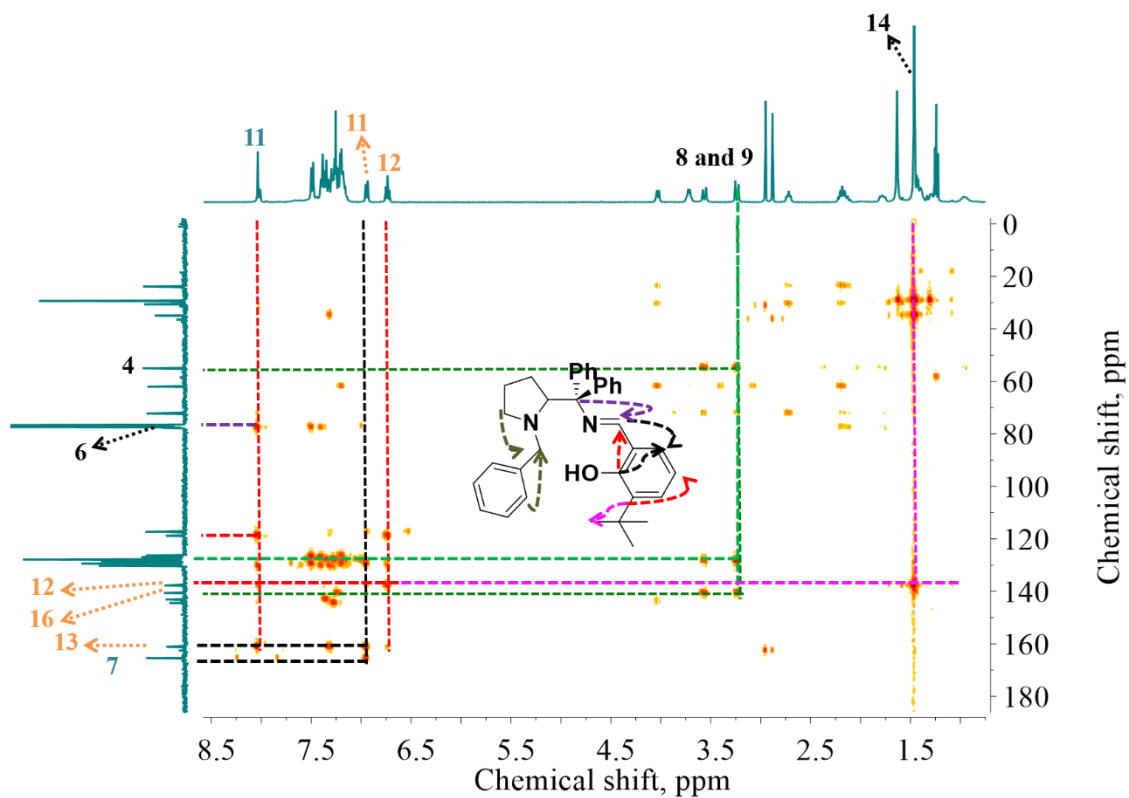

**Figure S14.** HBMC NMR spectrum of HL4 in CDCl<sub>3</sub> at room temperature.

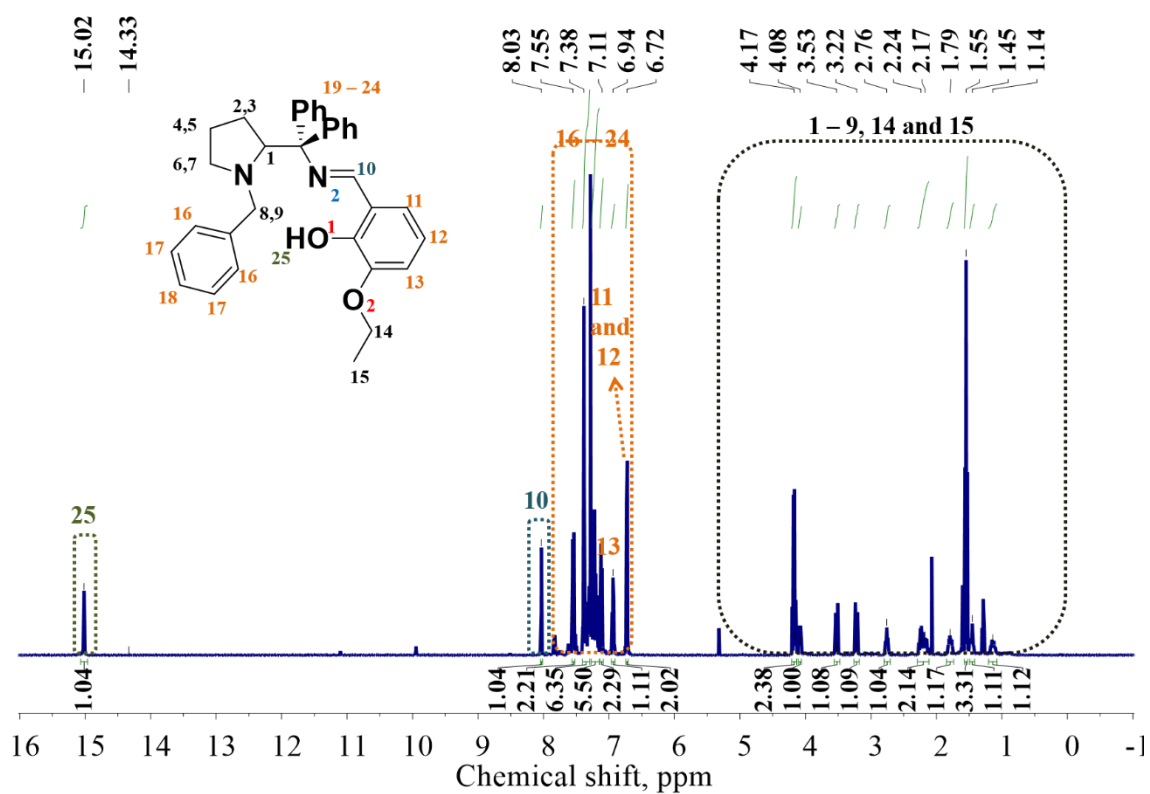

**Figure S15.** <sup>1</sup>H NMR spectrum of HL5 in CDCl<sub>3</sub> at room temperature.

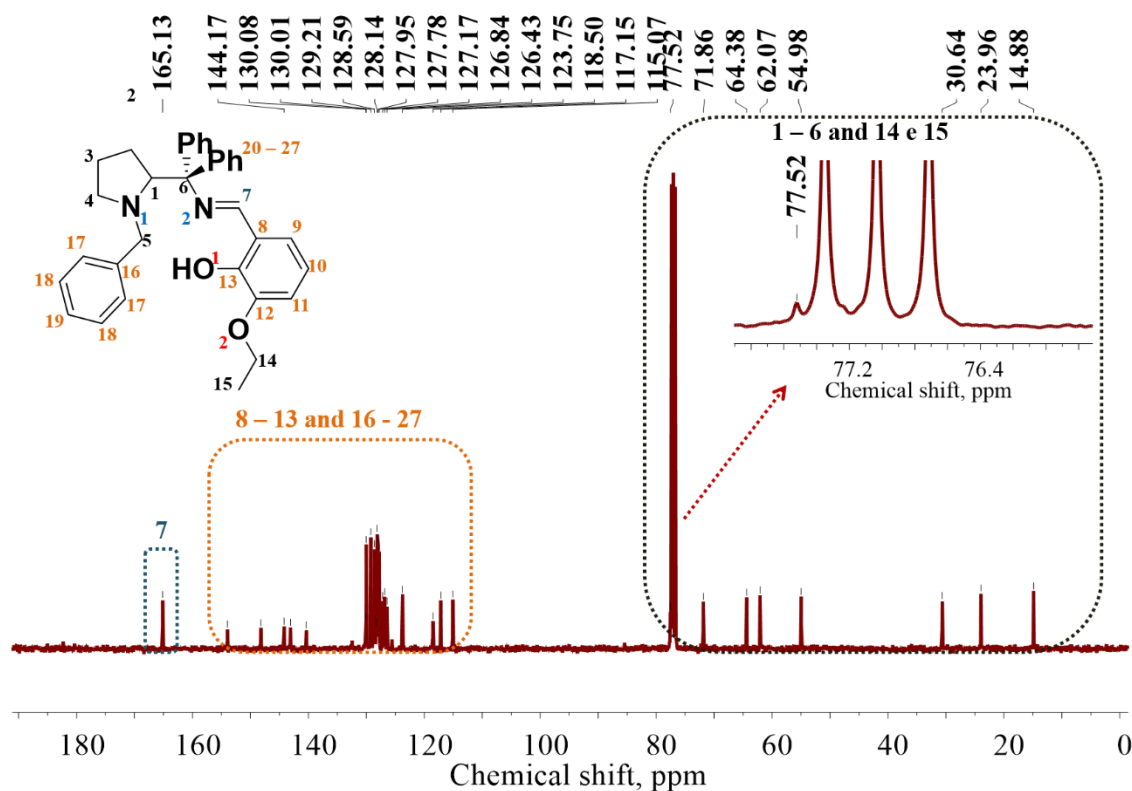

**Figure S16.**  $^{13}\text{C}$  NMR spectrum of HL5 in  $\text{CDCl}_3$  at room temperature.

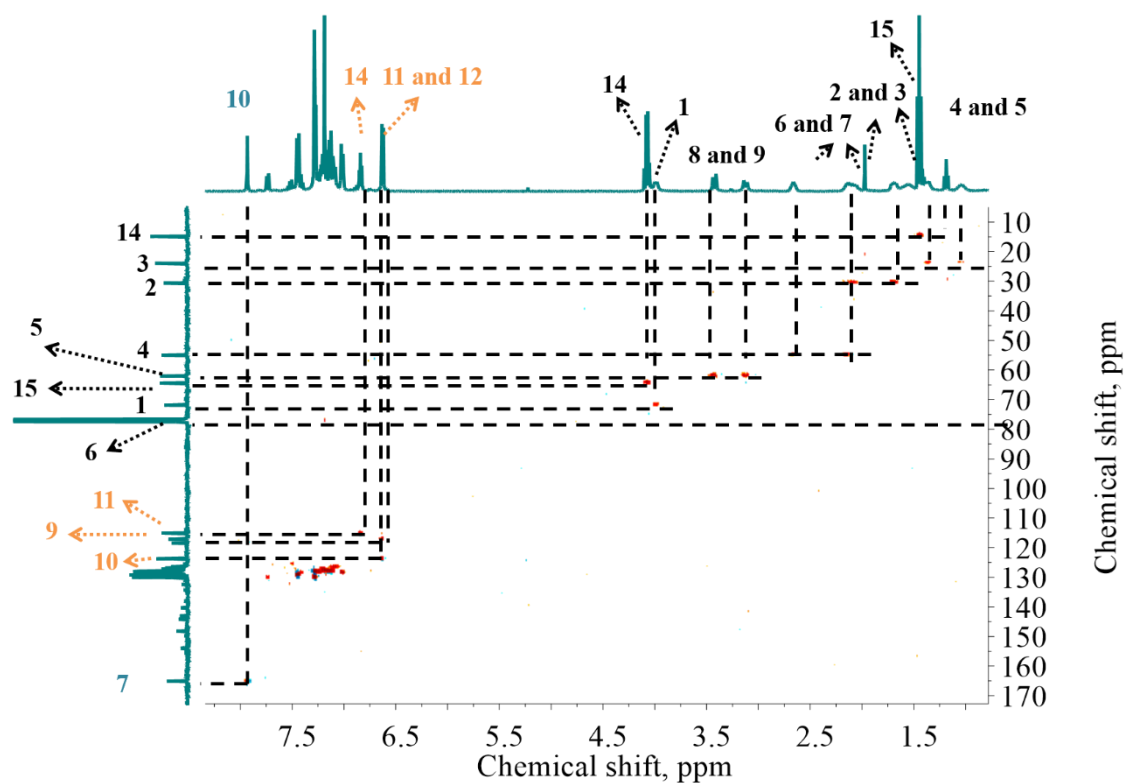

**Figure S17.** HSQC NMR spectrum of HL5 in  $\text{CDCl}_3$  at room temperature.

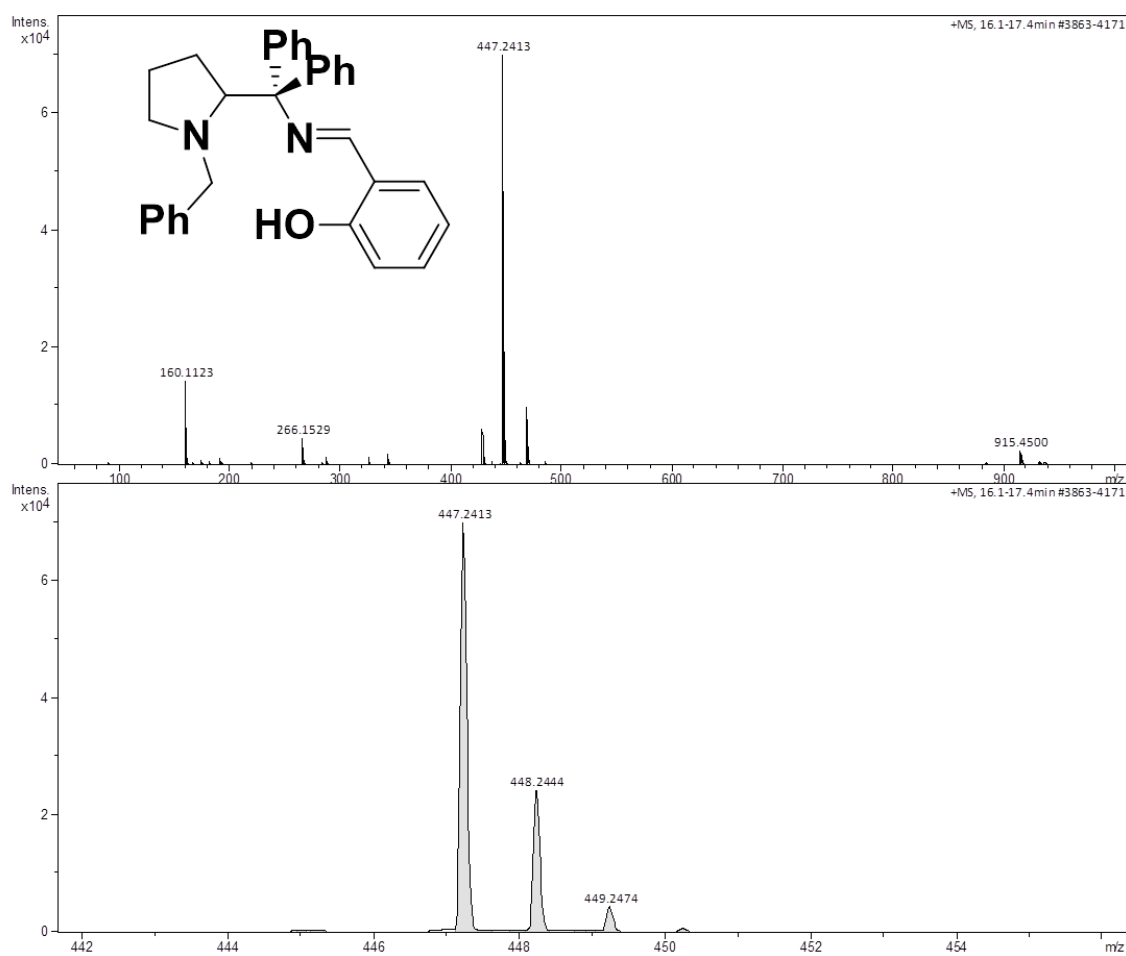

**Figura S18.**High Resolution Mass Spectra and Isotopic Pattern of HL1 in Ethyl Acetate/Methanol.

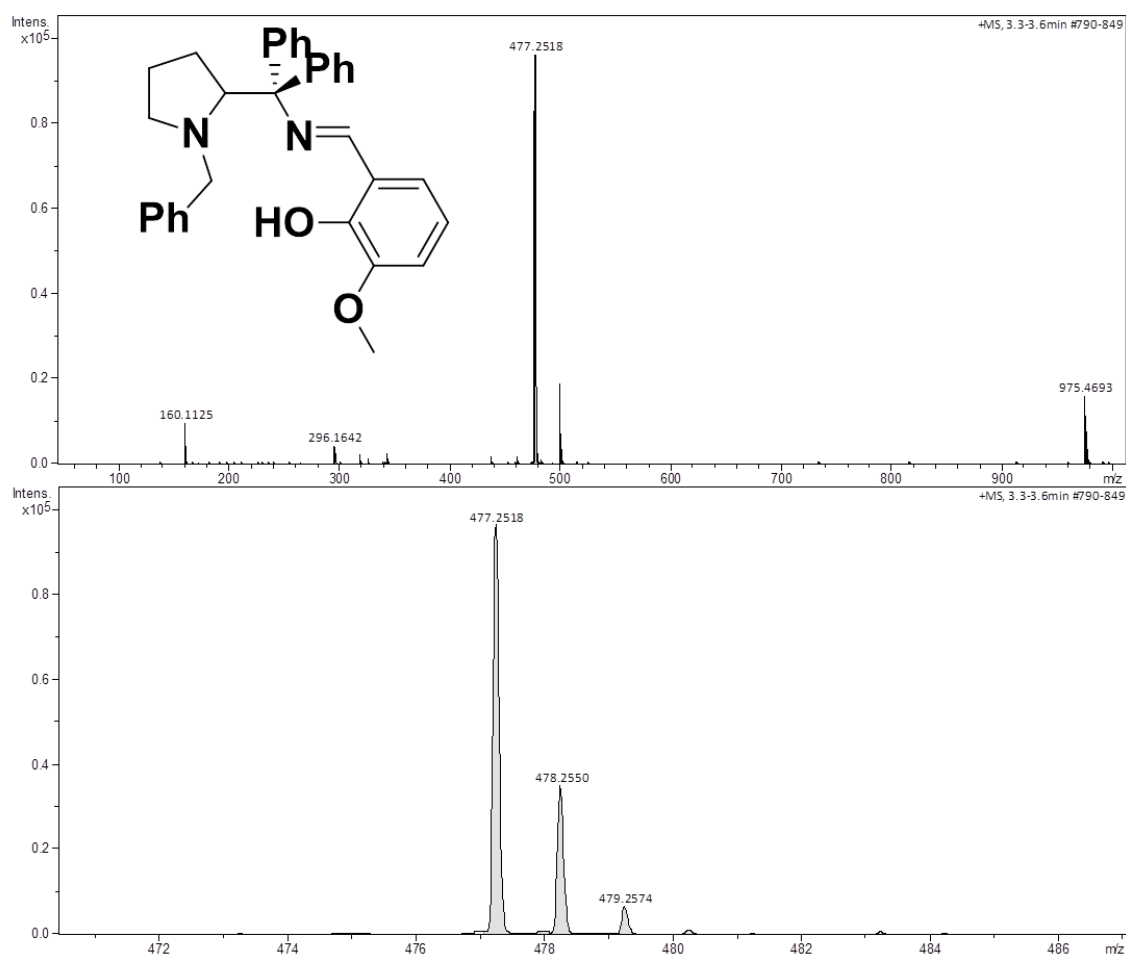

**Figura S19.**High Resolution Mass Spectra and Isotopic Pattern of HL2 in Ethyl Acetate/Methanol.

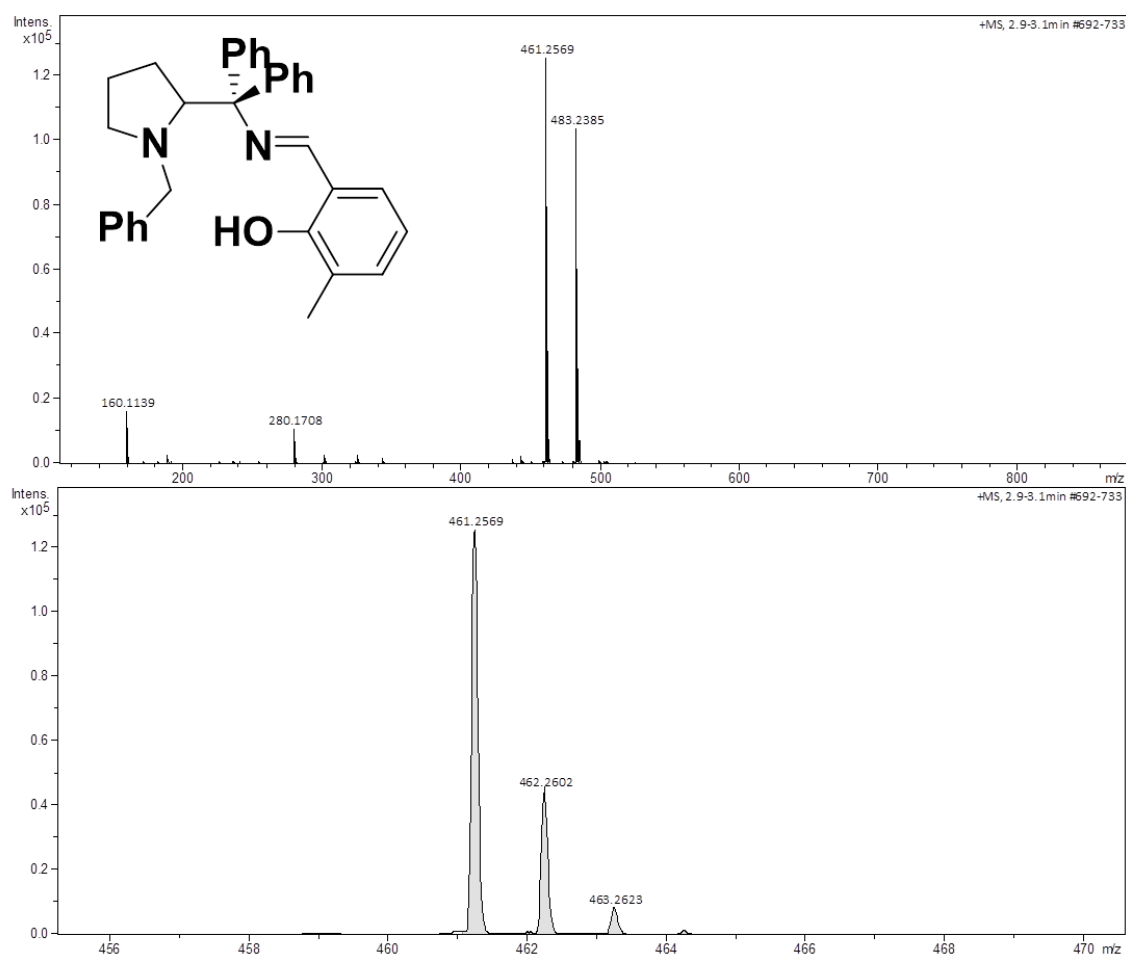

**Figura S20.**High Resolution Mass Spectra and Isotopic Pattern of HL3 in Ethyl Acetate/Methanol.

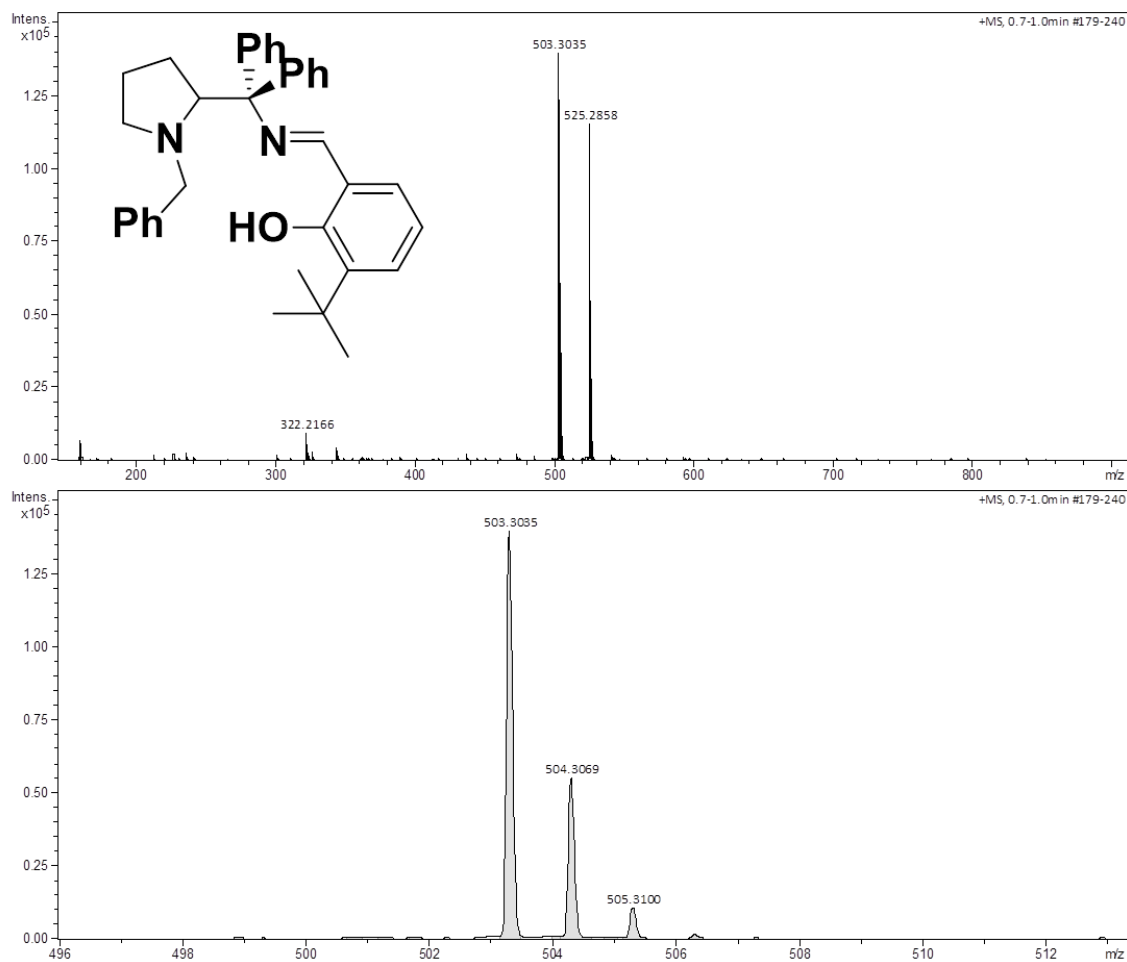

**Figura S21.**High Resolution Mass Spectra and Isotopic Pattern of HL4 in Ethyl Acetate/Methanol.

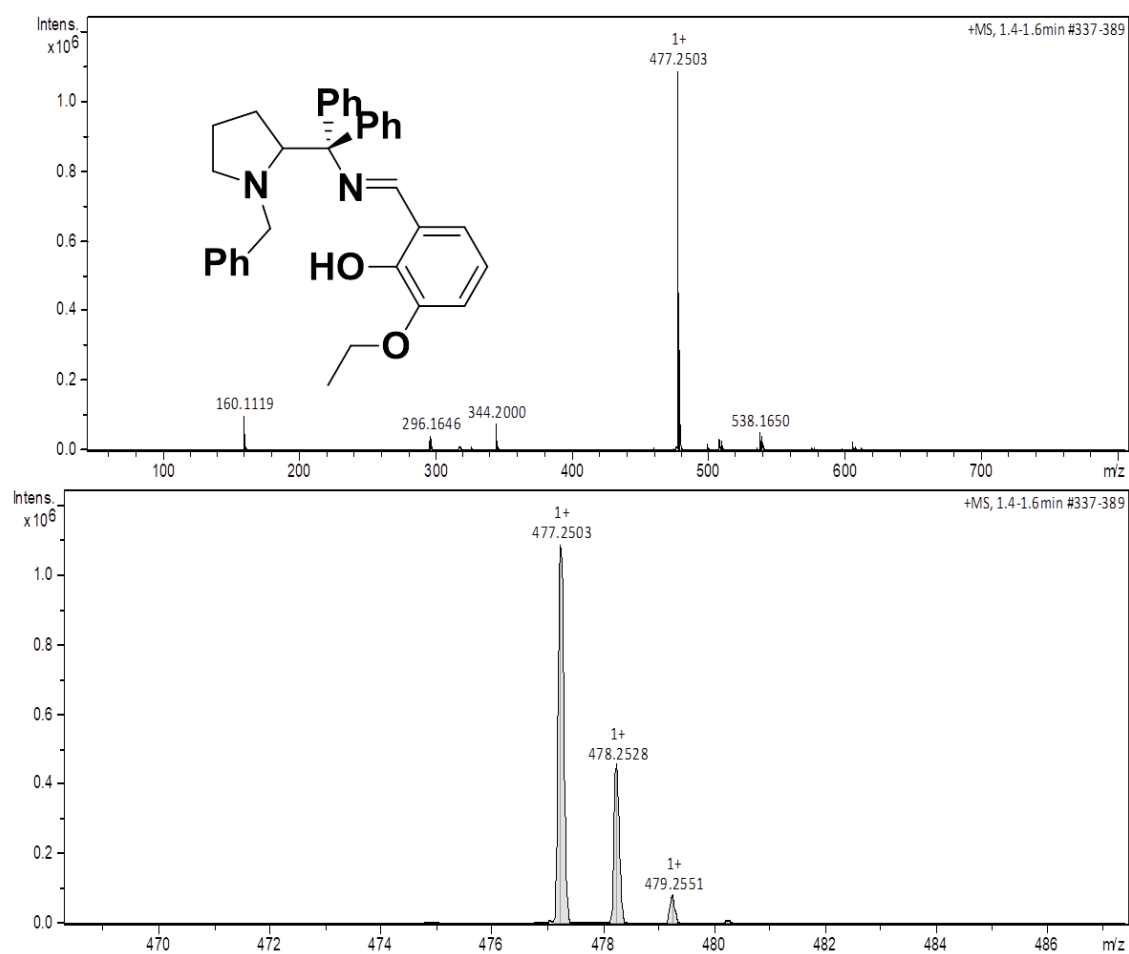

**Figura S22.**High Resolution Mass Spectra and Isotopic Pattern of HL5 in Ethyl Acetate/Methanol.

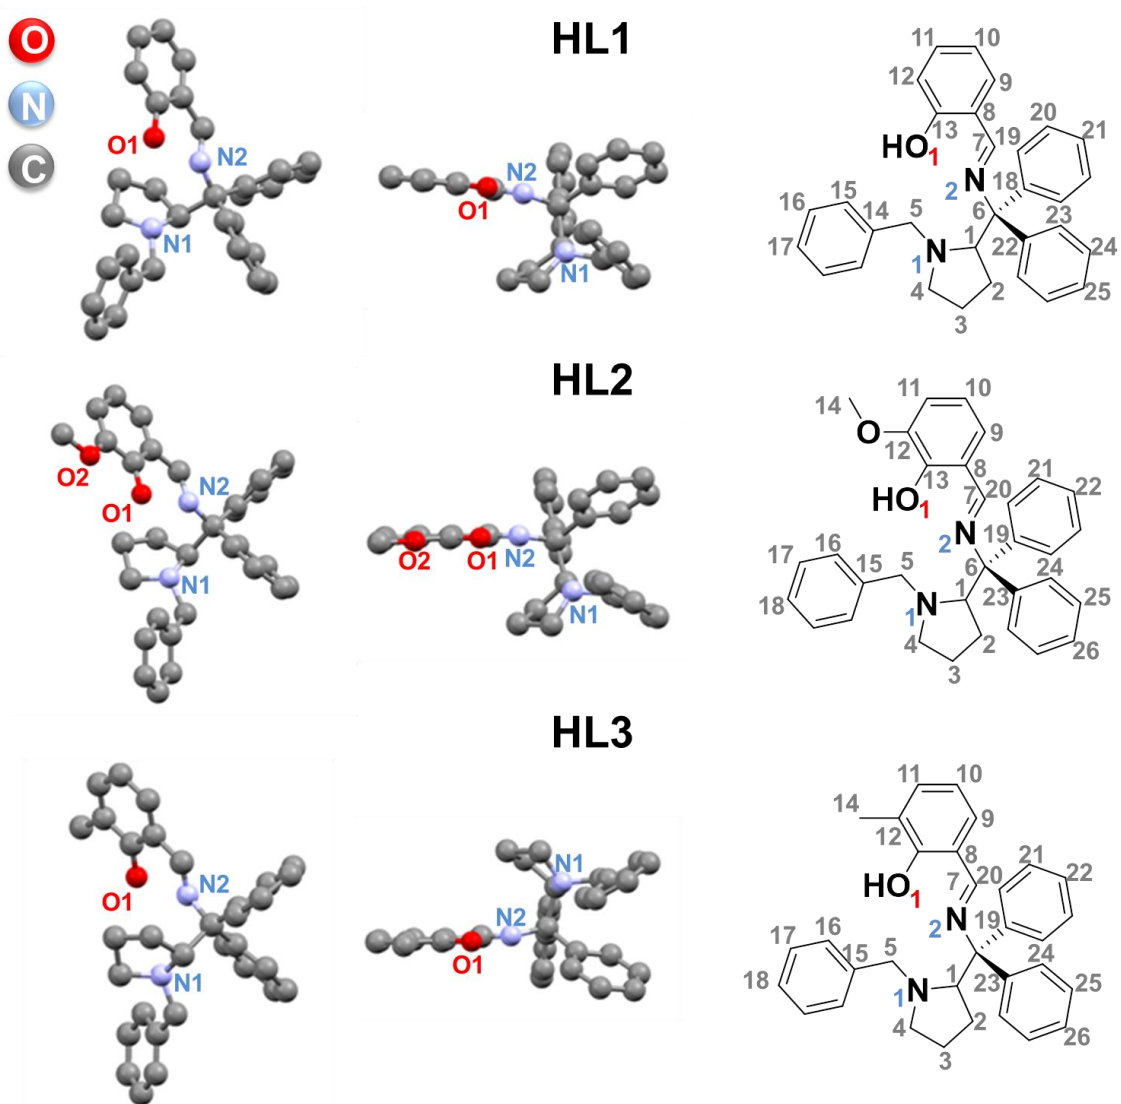

**Figure S23.**Optimized Crystalline Structure and numeric assignement of HL1, HL2 and HL3.

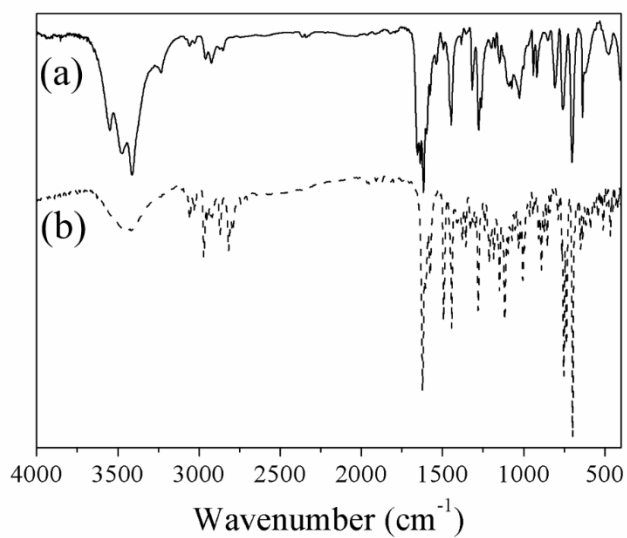

**Figure S24.** Comparison of FTIR spectra between (a) Cu<sup>II</sup>L1 and (b) HL1.

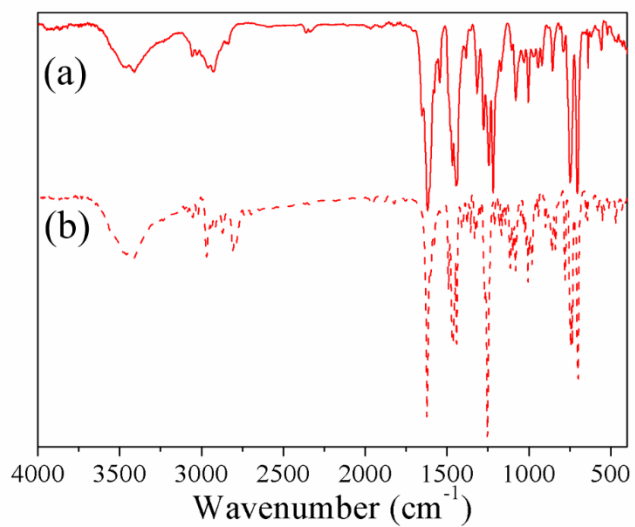

**Figure S25.** Comparison of FTIR spectra between (a) Cu<sup>II</sup>L2 and (b) HL2.

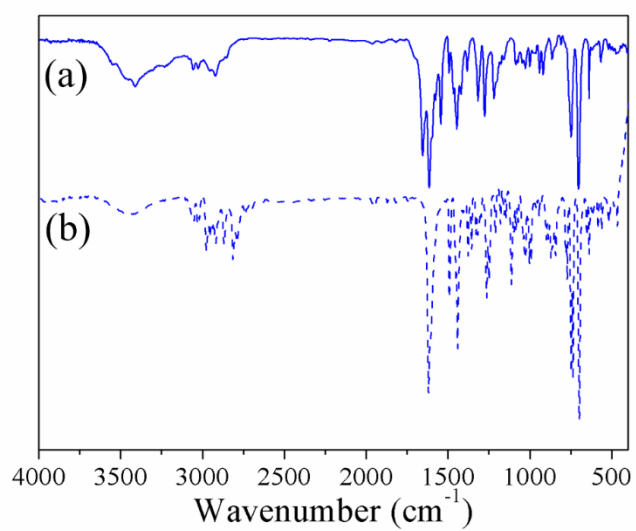

**Figure S26.** Comparison of FTIR spectra between (a)  $\text{Cu}^{\text{II}}\text{L3}$  and (b) HL3.

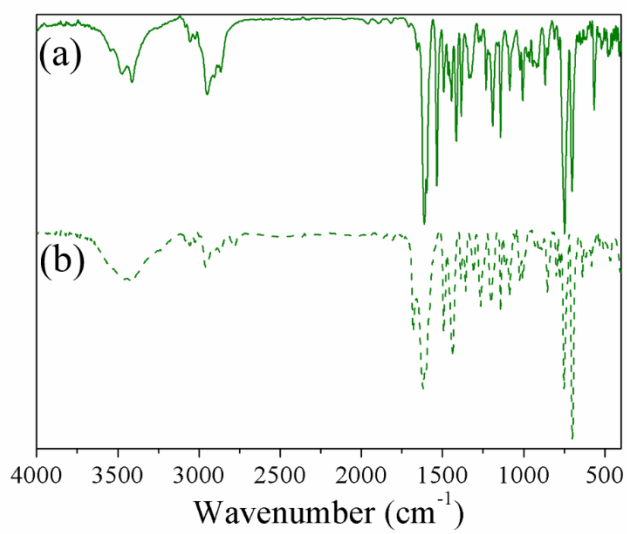

**Figure S27.** Comparison of FTIR spectra between (a)  $\text{Cu}^{\text{II}}\text{L4}$  and (b) HL4.

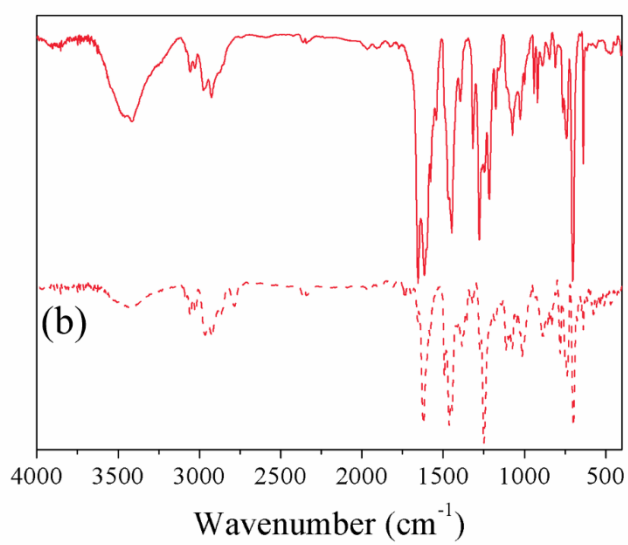

**Figure S28.** Comparison of FTIR spectra between (a) Cu<sup>II</sup>L5 and (b) HL5 dispersed in KBr.

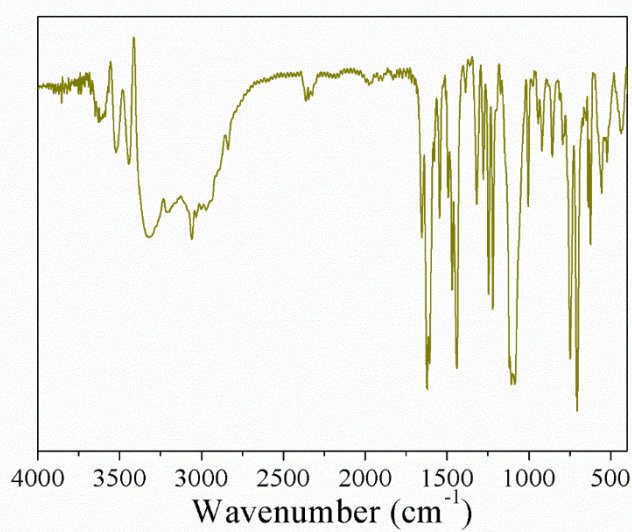

**Figure S29.** FTIR spectrum of [Cu<sup>II</sup>L2(CH<sub>3</sub>OH)]ClO<sub>4</sub> dispersed in KBr.

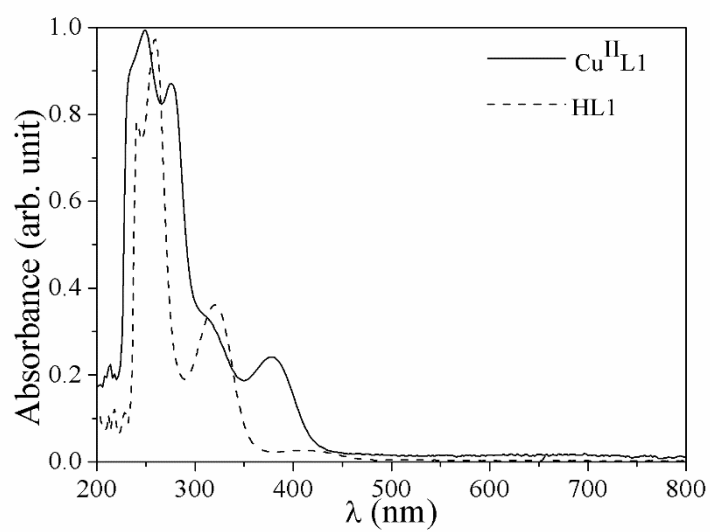

**Figure S30.** Comparison of UV-Vis spectra between  $\text{Cu}^{\text{II}}\text{L1}$  and HL1 in dichloromethane.

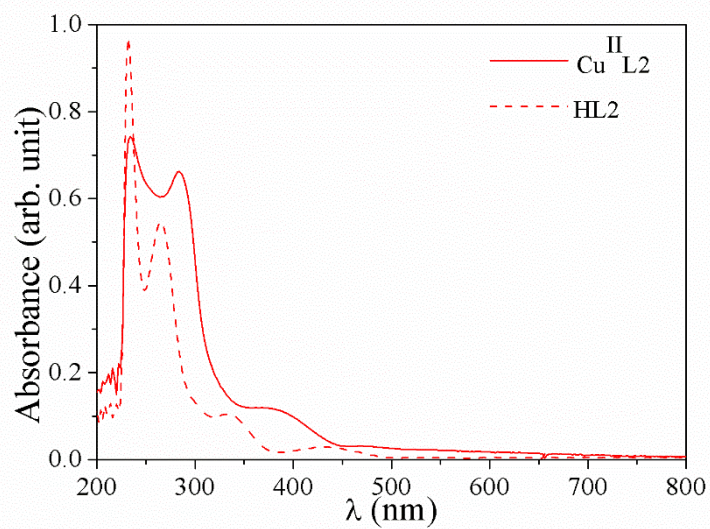

**Figure S31.** Comparison of UV-Vis spectra between  $\text{Cu}^{\text{II}}\text{L2}$  and HL2 in dichloromethane.

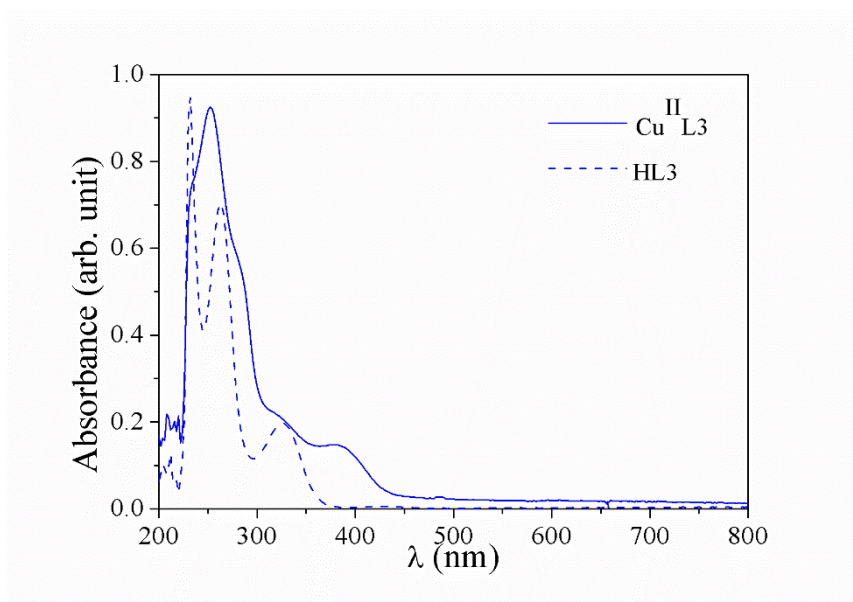

**Figure S32.** Comparison of UV-Vis spectra between  $\text{Cu}^{\text{II}}\text{L3}$  and  $\text{HL3}$  in dichloromethane.

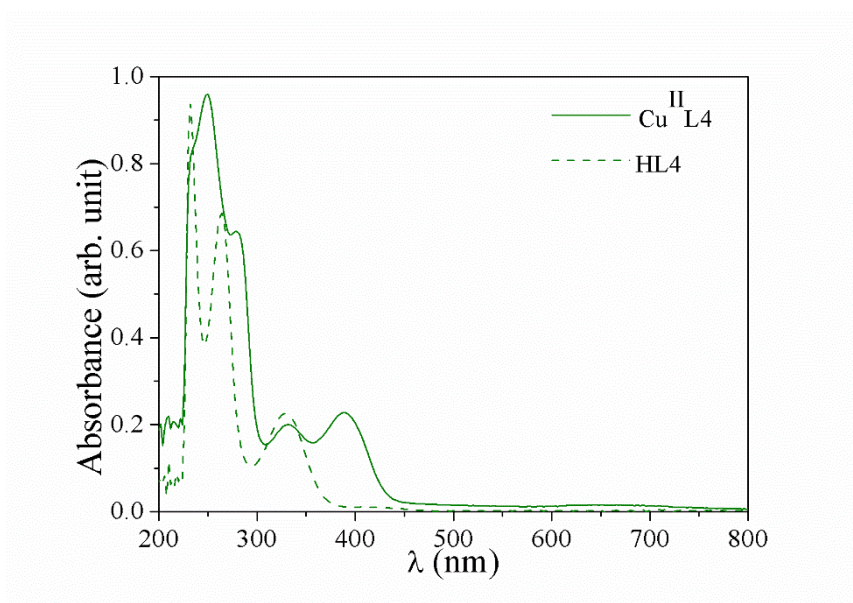

**Figure S33.** Comparison of UV-Vis spectra between  $\text{Cu}^{\text{II}}\text{L4}$  and  $\text{HL4}$  dichloromethane.

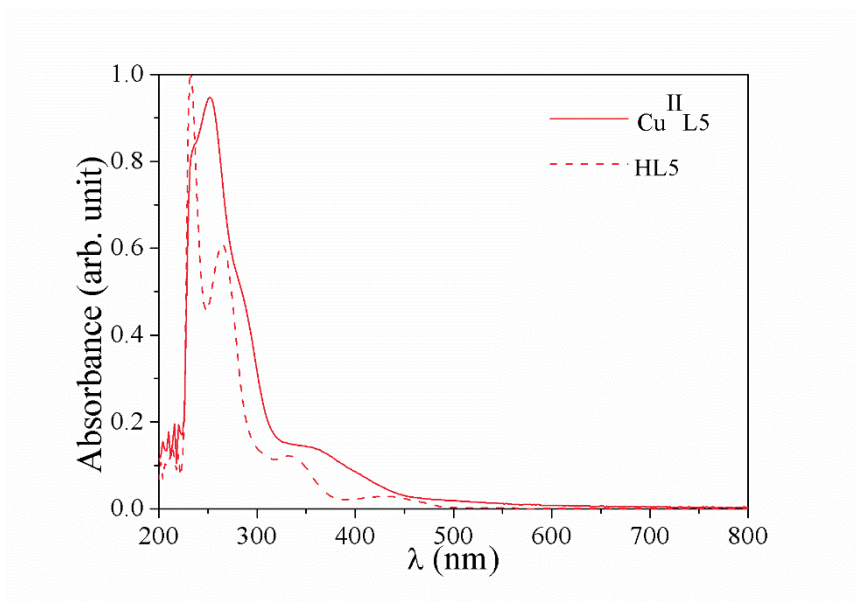

**Figure S34.** Comparison of UV-Vis spectra between  $\text{Cu}^{\text{II}}\text{L5}$  and HL5 in dichloromethane.

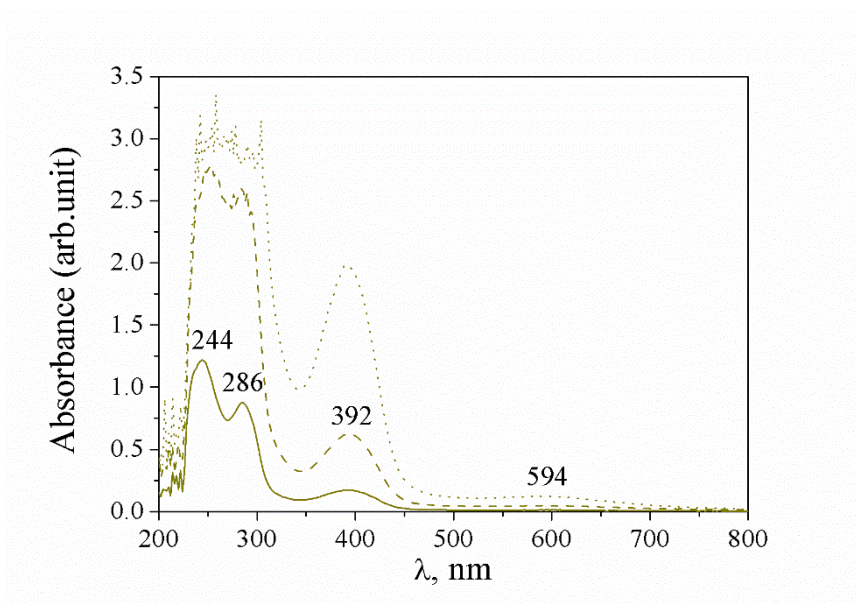

**Figure S35.** UV-Vis spectrum of  $[\text{Cu}^{\text{II}}\text{L5}(\text{CH}_3\text{OH})]\text{ClO}_4$  in dichloromethane.

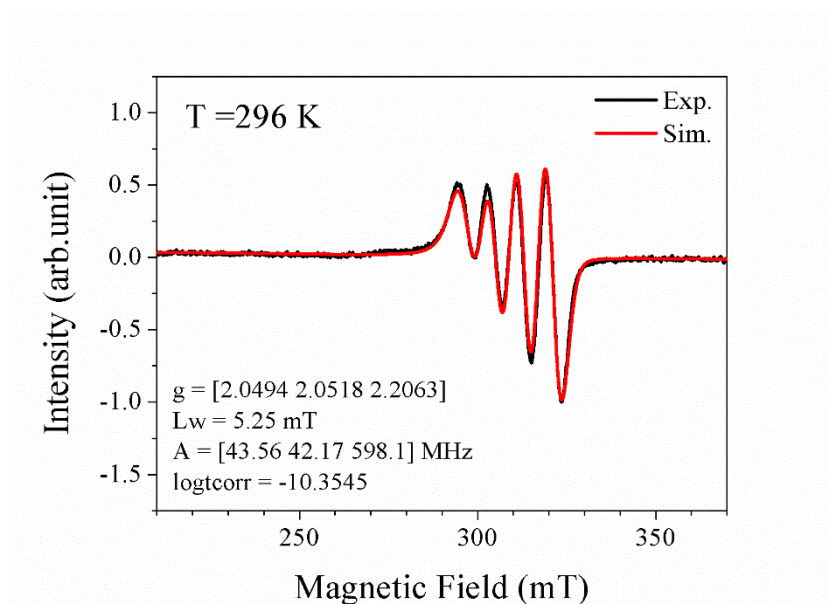

**Figure S36.**Simulation of EPR spectrum in dichloromethane at 298 K for Cu<sup>II</sup>L1.

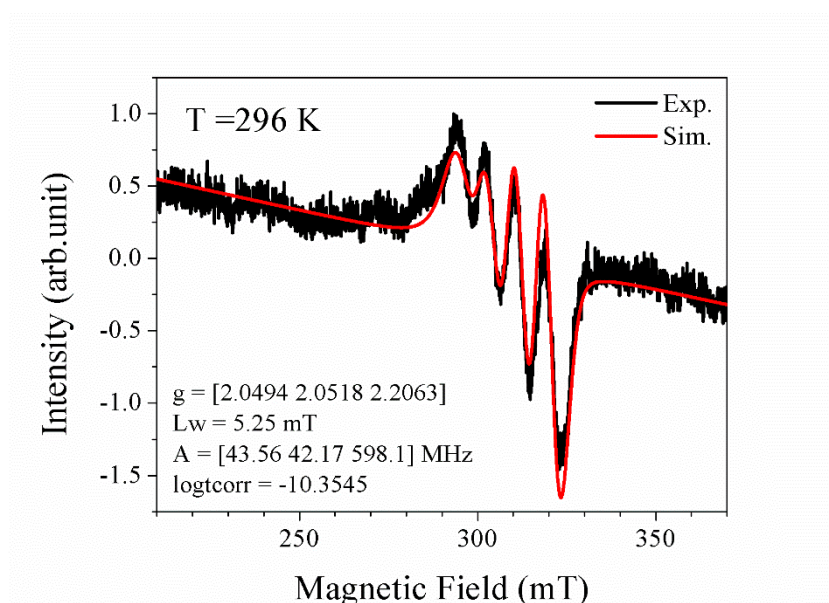

**Figure S37.**Simulation of EPR spectrum in dichloromethane at 298 K for Cu<sup>II</sup>L2.

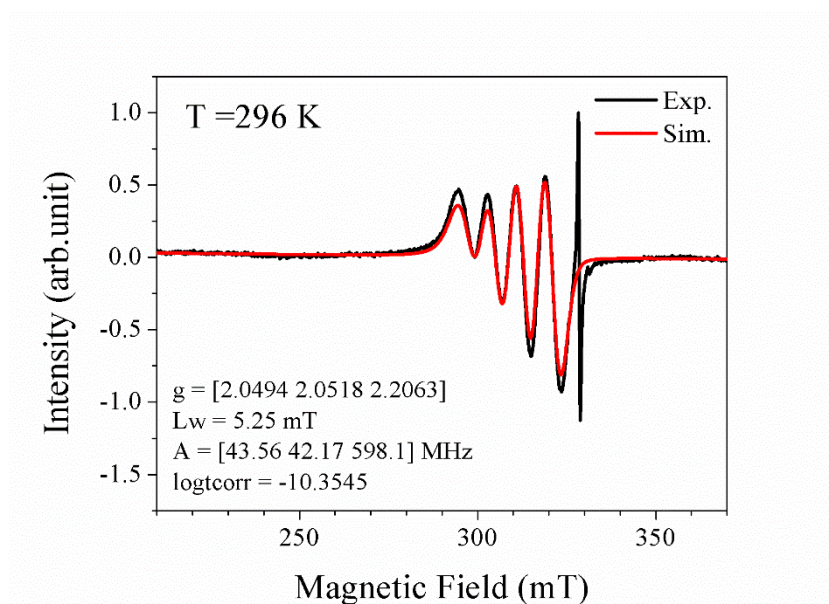

**Figure S38.**Simulation of EPR spectrum in dichloromethane at 298 K for Cu<sup>II</sup>L3.

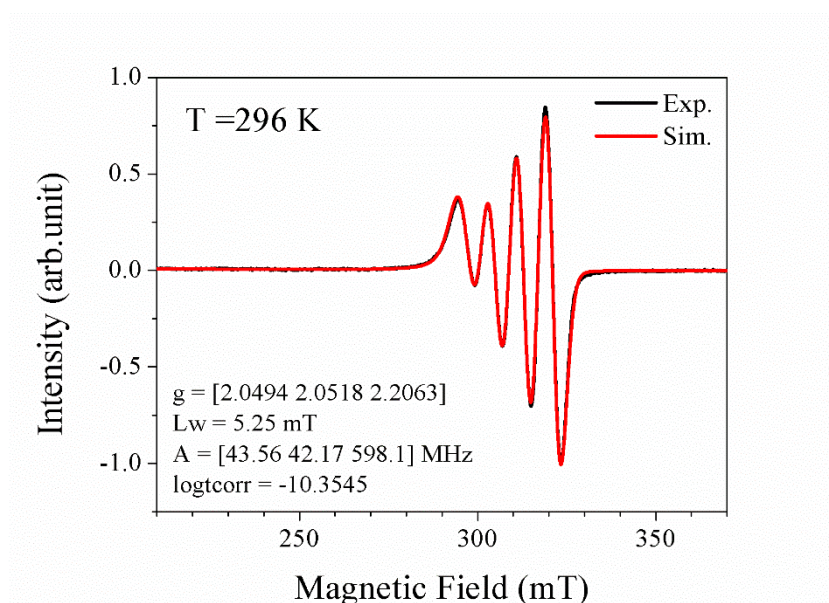

**Figure S39.**Simulation of EPR spectrum in dichloromethane at 298 K for Cu<sup>II</sup>L4.

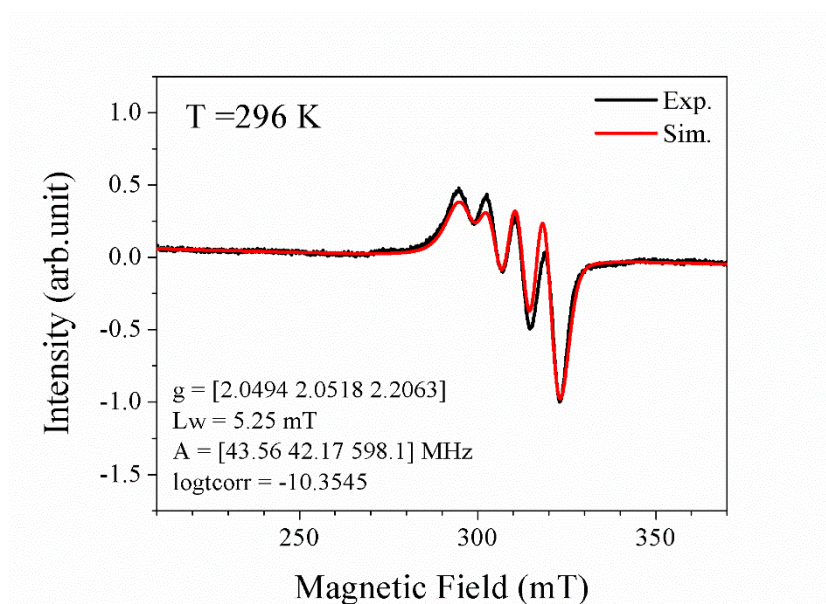

**Figure S40.**Simulation of EPR spectrum in dichloromethane at 298 K for Cu<sup>II</sup>L5.

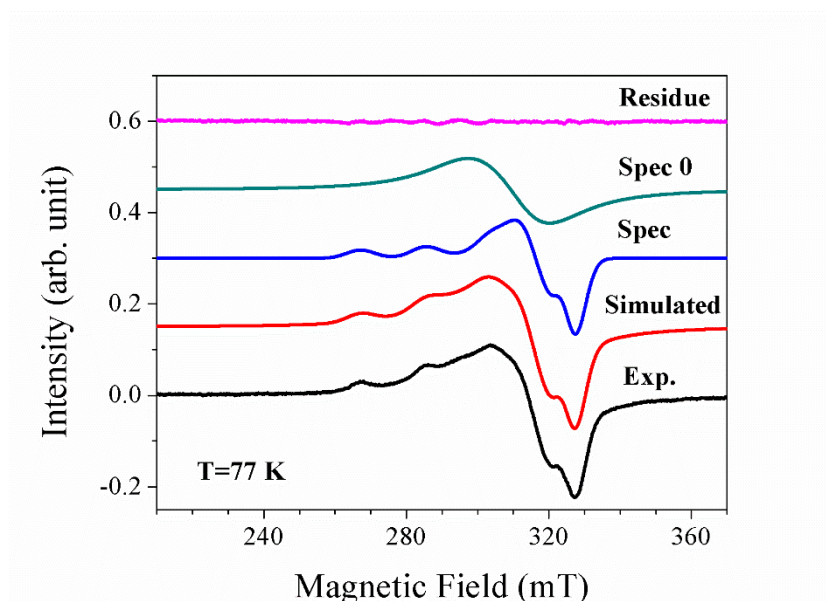

**Figure S41.**EPR spectral simulation of the Cu<sup>II</sup>L1 complex at 77 K. “Spec” indicates the spectrum of the monomeric structure and “Spec0” of the dimeric structures.

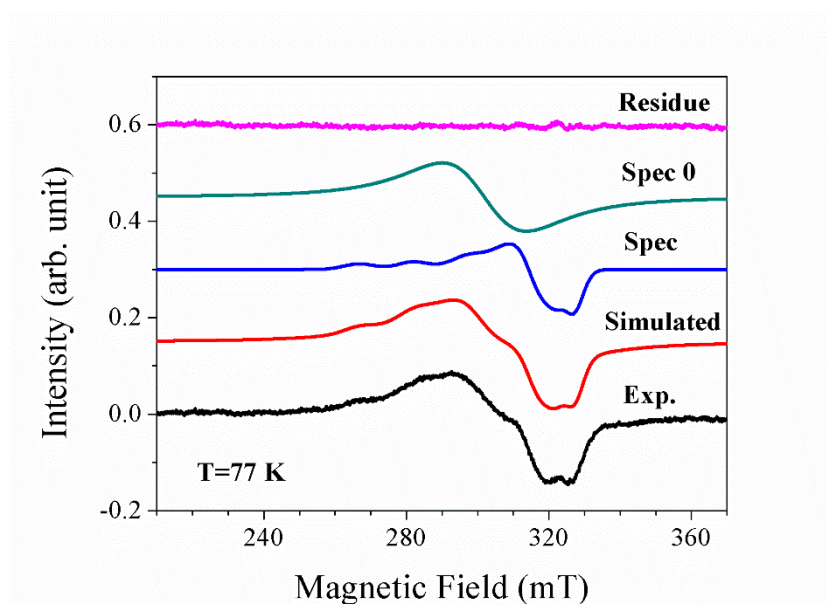

**Figure S42.** EPR spectral simulation of the Cu<sup>II</sup>L2 complex at 77 K. “Spec” indicates the spectrum of the monomeric structure and “Spec0” of the dimeric structures.

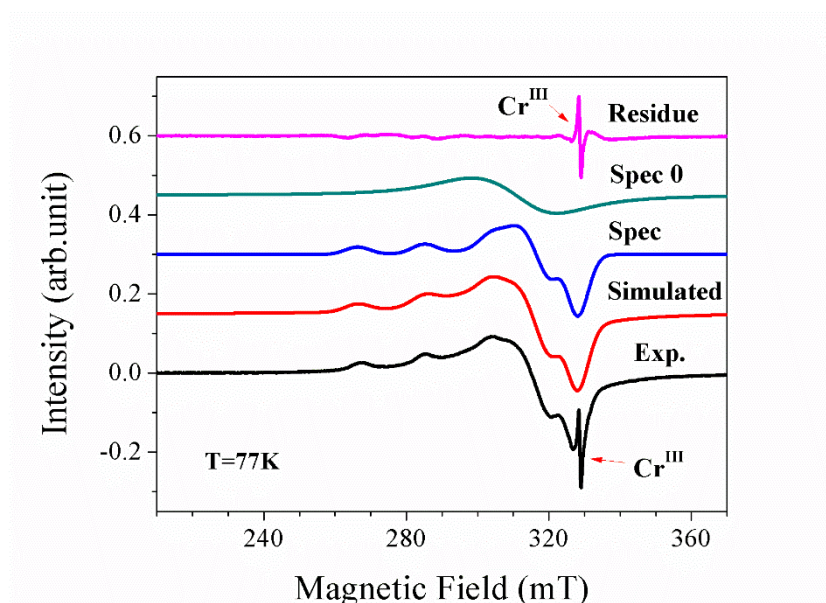

**Figure S43.** Spectral simulation of the Cu<sup>II</sup>L3 complex at 77 K. “Spec” indicates the spectrum of the monomeric structure and “Spec0” of the dimeric structures.

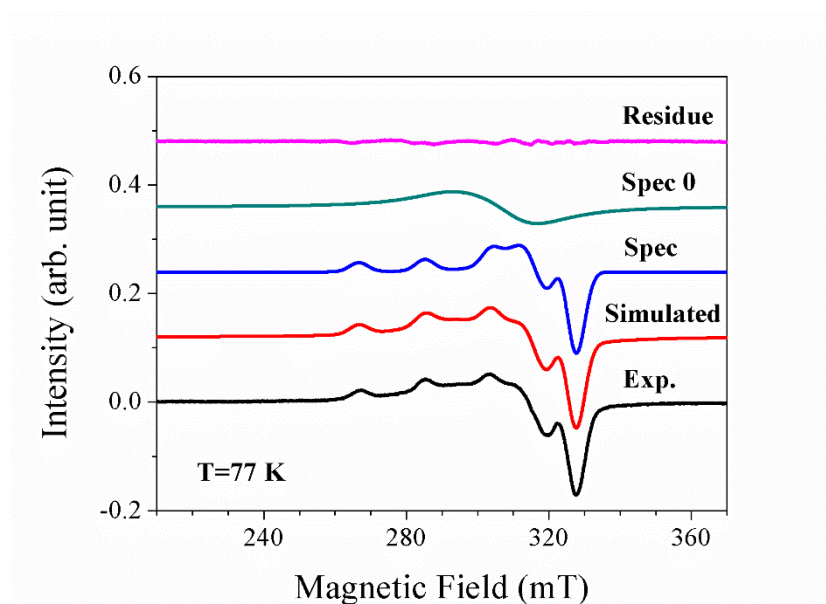

**Figure S44.** EPR spectral simulation of the  $\text{Cu}^{\text{II}}\text{L5}$  complex at 77 K. “Spec” indicates the spectrum of the monomeric structure and “Spec0” of the dimeric structures.

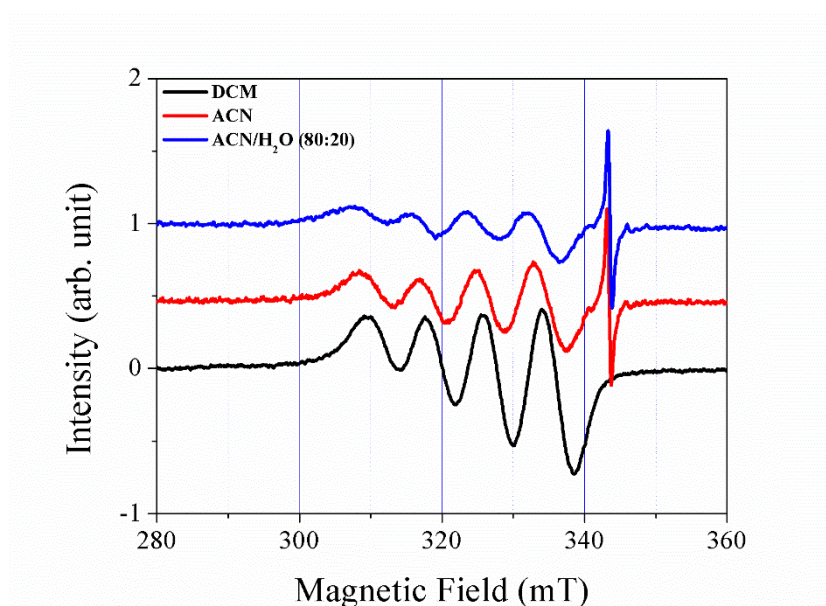

**Figure S45.** Comparison of the EPR spectra in dichloromethane, acetonitrile and acetonitrile/water (80:20) mixture at 298 K for the  $\text{Cu}^{\text{II}}\text{L1}$  complex.

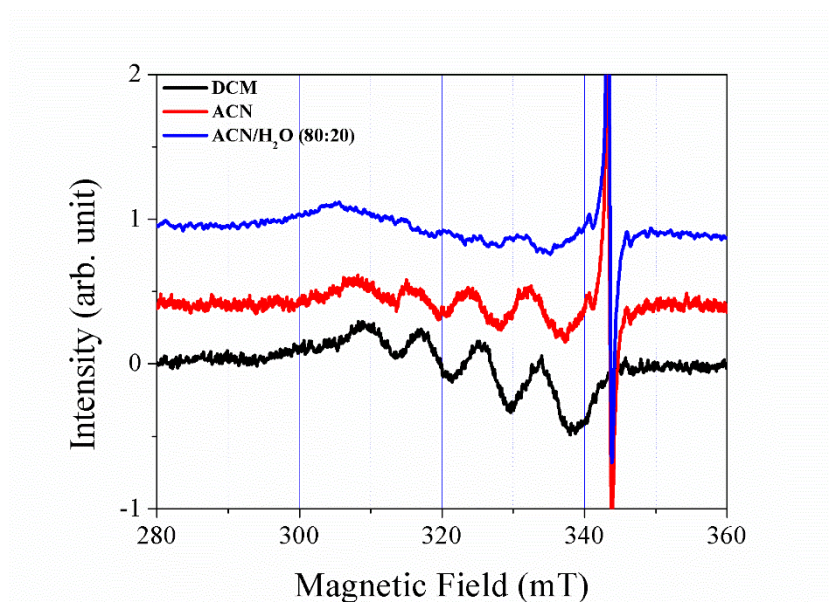

**Figure S46.** Comparison of the EPR spectra in dichloromethane, acetonitrile and acetonitrile/water (80:20) mixture at 298 K for the  $\text{Cu}^{\text{II}}\text{L2}$  complex.

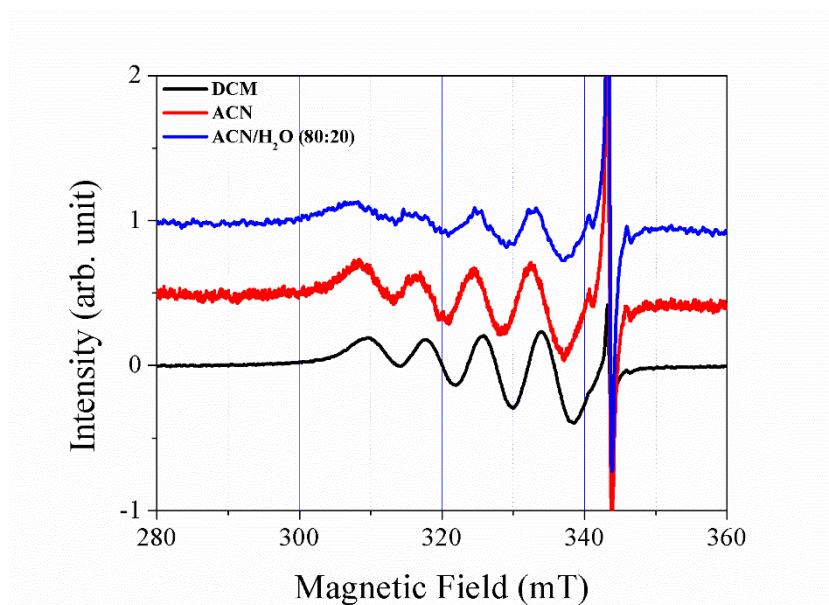

**Figure S47.** Comparison of the EPR spectra in dichloromethane, acetonitrile and acetonitrile/water (80:20) mixture at 298 K for the  $\text{Cu}^{\text{II}}\text{L3}$  complex.

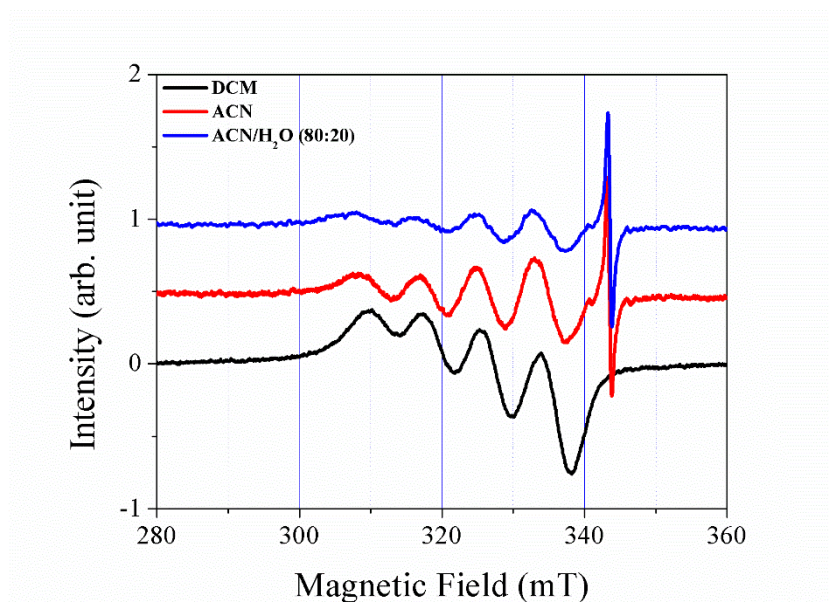

**Figure S48.** Comparison of the EPR spectra in dichloromethane, acetonitrile and acetonitrile/water (80:20) mixture at 298 K for the Cu<sup>II</sup> L5 complex.

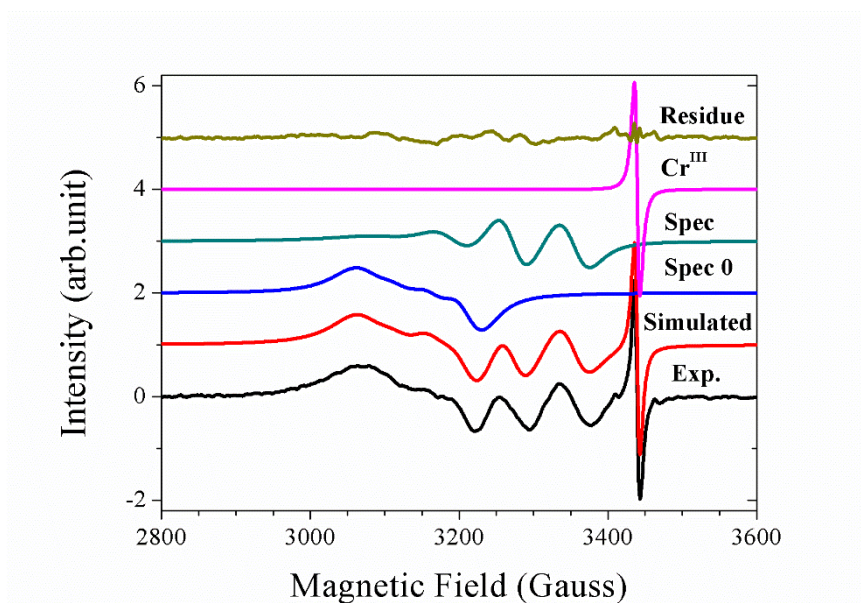

**Figure S49.** EPR spectral simulation of the Cu<sup>II</sup> L2 complex at 298 K in methanol. “Spec” indicates the spectrum of the monomeric structure and “Spec0” of the dimeric structures.

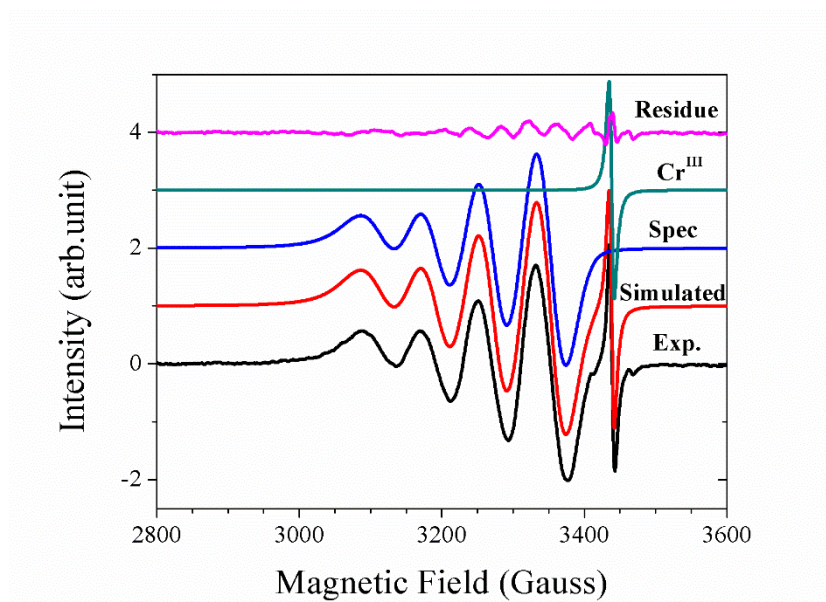

**Figure S50.** EPR spectral simulation of the  $[\text{Cu}^{\text{II}}\text{L2}(\text{CH}_3\text{OH})]\text{ClO}_4$  complex at 298 K in methanol. “Spec” indicates the spectrum of the monomeric structure.

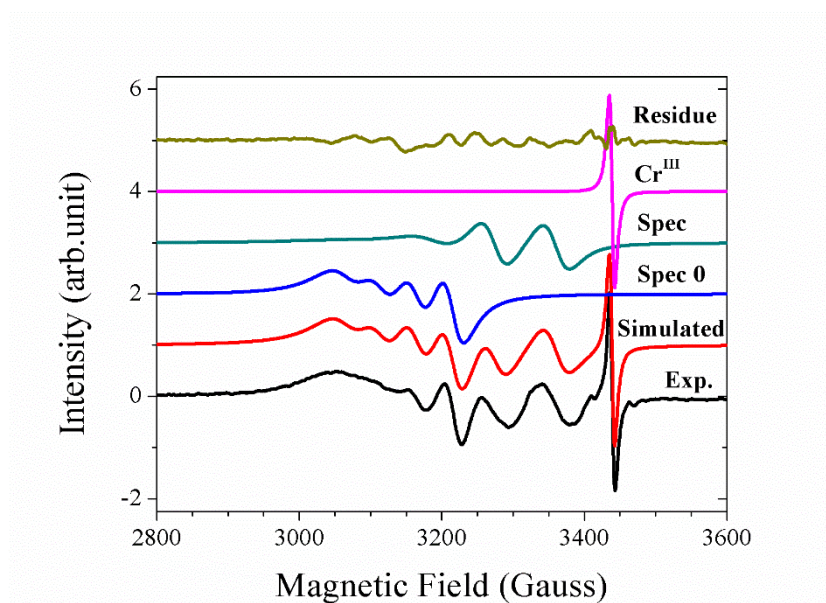

**Figure S51.** EPR spectral simulation of the  $\text{Cu}^{\text{II}}\text{L2}$  complex at 298 K in methanol/water (80:20). “Spec” indicates the spectrum of the monomeric structure and “Spec0” of the dimeric structures.

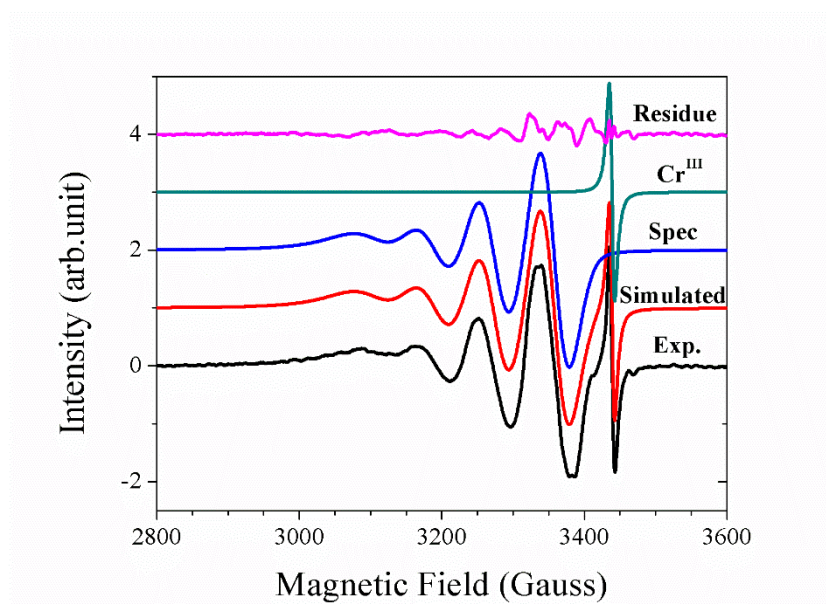

**Figure S52.** EPR spectral simulation of the  $[\text{Cu}^{\text{II}}\text{L2}(\text{CH}_3\text{OH})]\text{ClO}_4$  complex at 298 K in methanol/water (80:20). “Spec” indicates the spectrum of the monomeric structure.

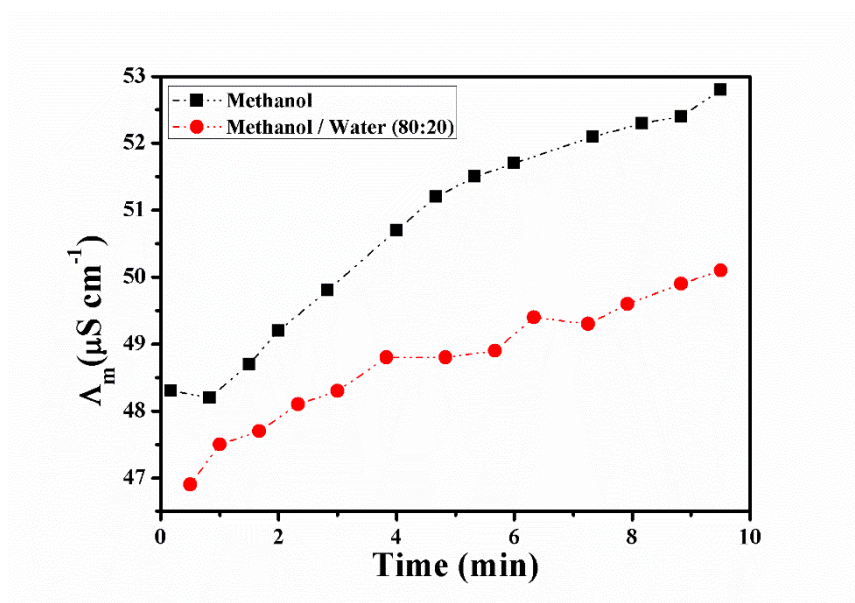

**Figure S53.** Conductivity measurements over time in (black) methanol and (red) methanol/water mixture for  $\text{Cu}^{\text{II}}\text{L2}(\text{Cl})$  complex.

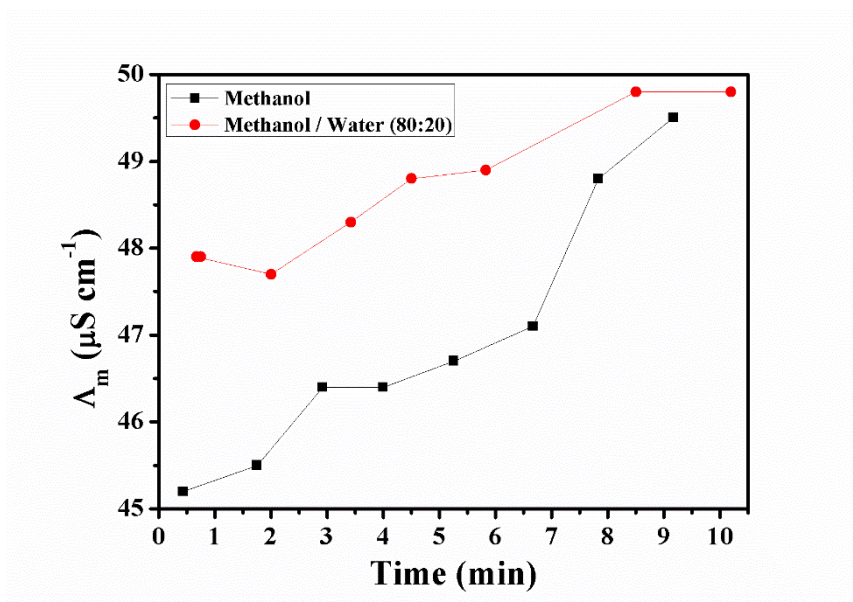

**Figure S54.** Conductivity measurements over time in (black) methanol and (red) methanol/water mixture for  $\text{Cu}^{\text{II}}\text{L3}(\text{Cl})$  complex.

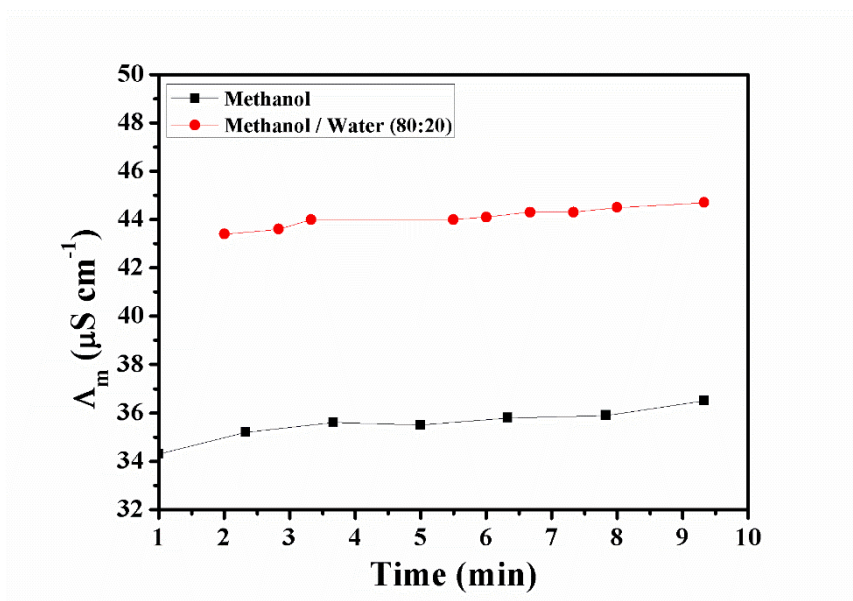

**Figure S55.** Conductivity measurements over time in (black) methanol and (red) methanol/water mixture for  $\text{Cu}^{\text{II}}\text{L4}(\text{Cl})$  complex.

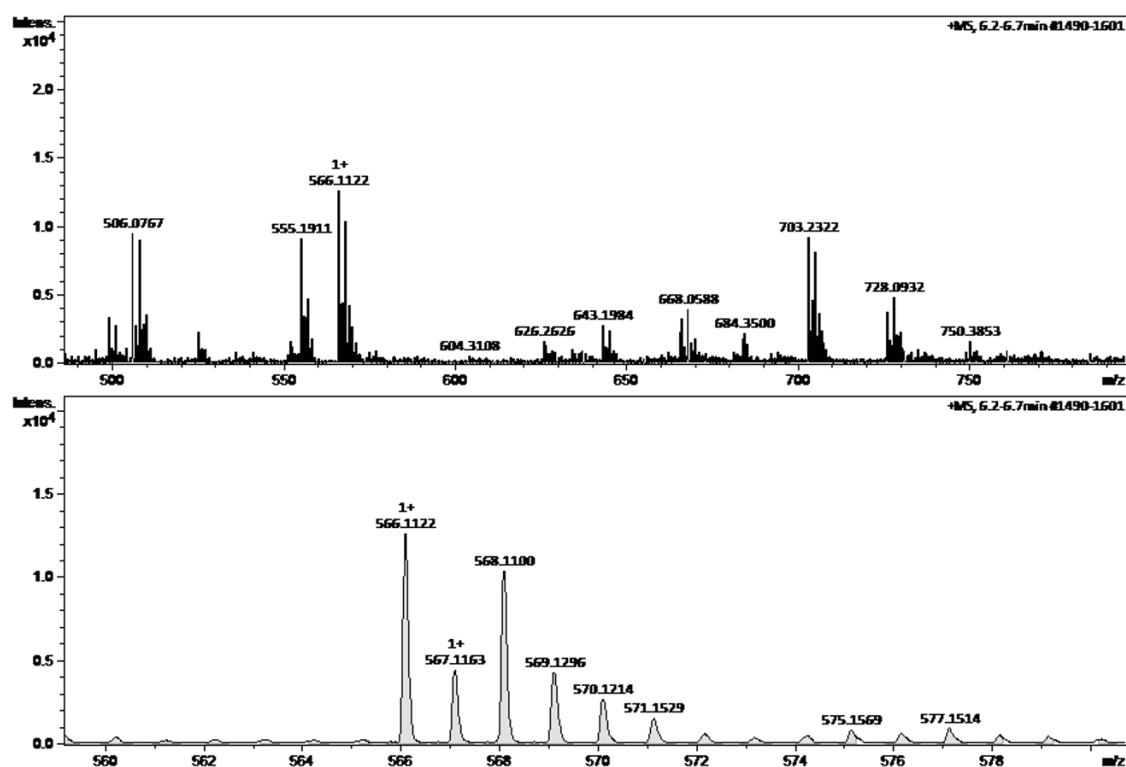

**Figura S56.** High Resolution Mass Spectra and Isotopic Pattern of Cu<sup>II</sup>L1 from the peak of molecular ion attributed to the illustrated structure with calculated  $m/z$  566.1162  $[M + Na^+]^+$ .



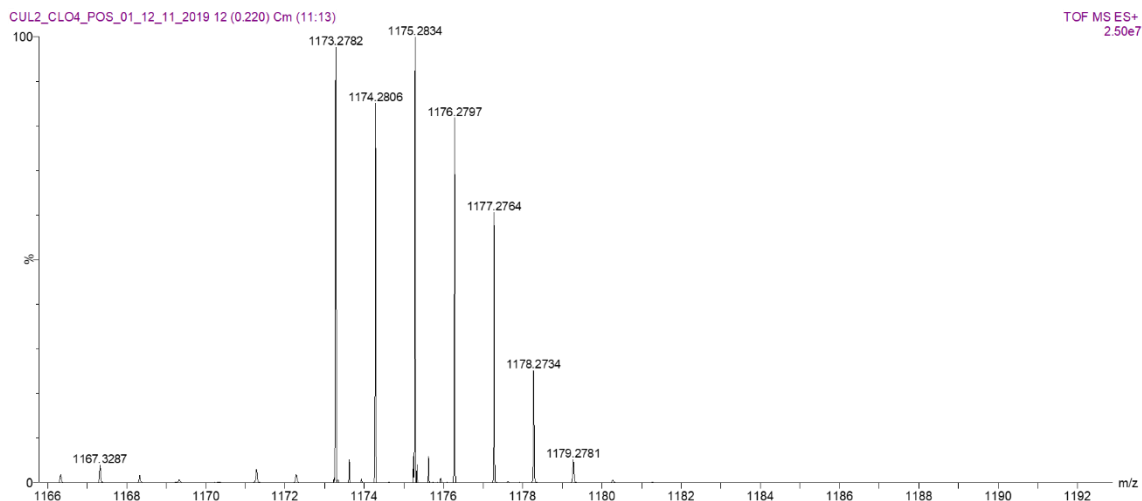

**Figure S59.** High Resolution Mass Spectra and Isotopic Pattern of  $[\text{Cu}^{\text{II}}\text{L2ClO}_4]$  from the peak of molecular ion attributed to the illustrated structure with calculated  $m/z$  1175.2834  $[2\text{M} - \text{ClO}_4]^+$ . “M” indicates the molecular mass of  $1277.2075 \text{ g mol}^{-1}$ .

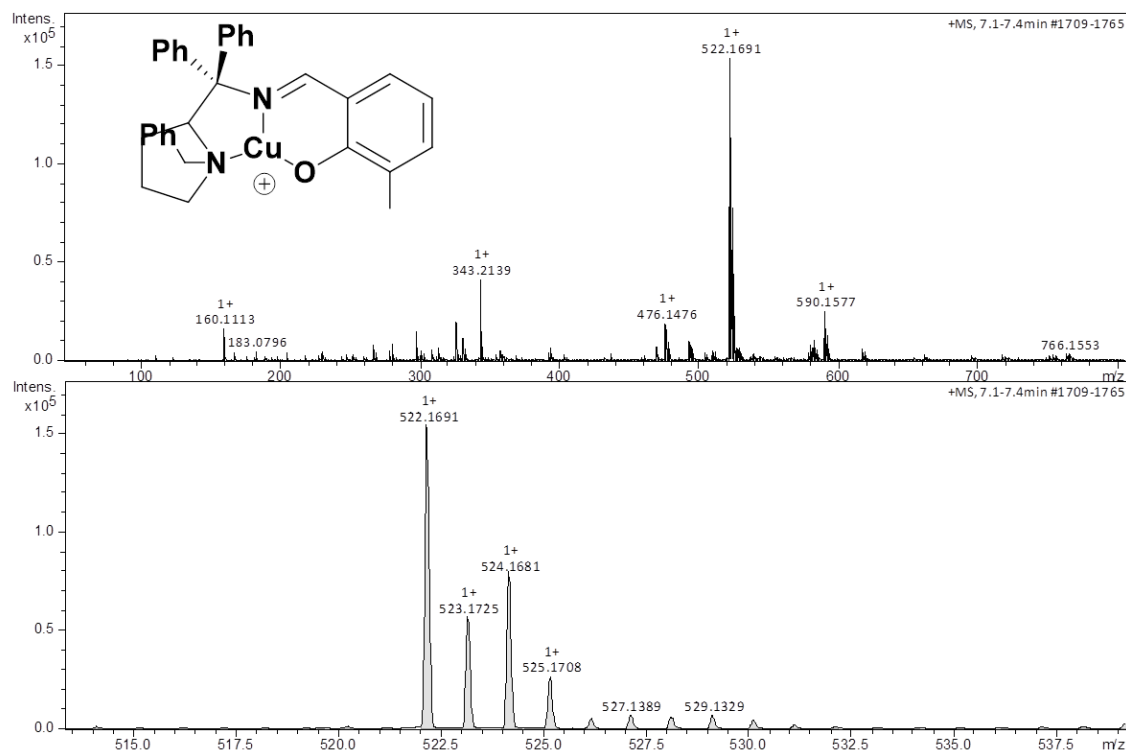

**Figura S60.** High Resolution Mass Spectra and Isotopic Pattern of Cu<sup>II</sup>L3 from the peak of molecular ion attributed to the illustrated structure with calculated  $m/z$  522.1727

$[M - HCl]^+$ . “M” indicates the molecular mass of 558.6090 g mol<sup>-1</sup>.

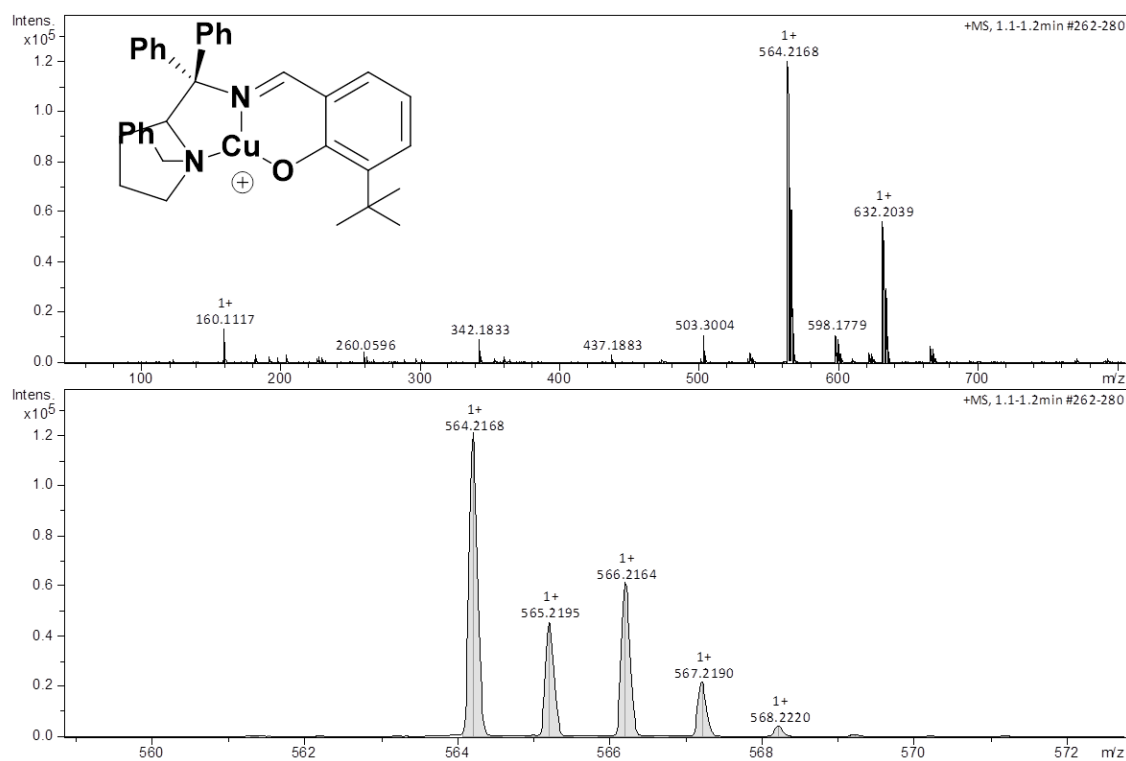

**Figura S61.** High Resolution Mass Spectra and Isotopic Pattern of Cu<sup>II</sup>L4 from the peak of molecular ion attributed to the illustrated structure with calculated  $m/z$  564.2196

$[M - HCl]^+$ . “M” indicates the molecular mass of 600.6900 g mol<sup>-1</sup>.

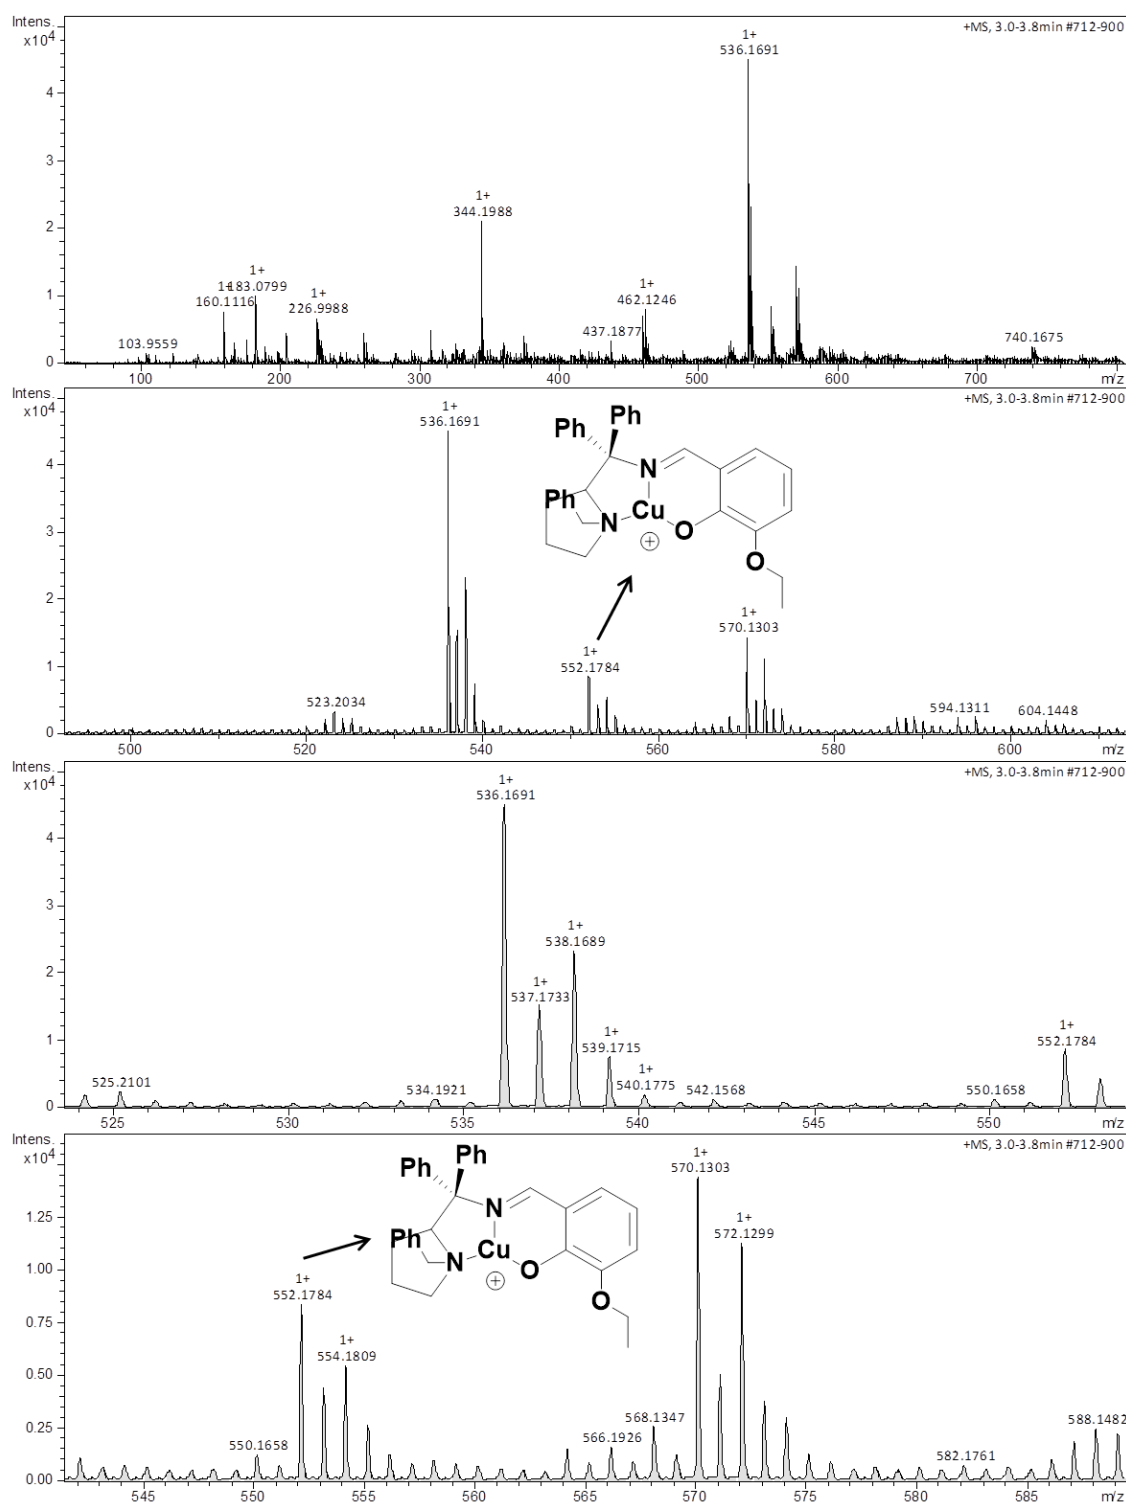

**Figure S62.** High Resolution Mass Spectra and Isotopic Pattern of  $\text{Cu}^{\text{II}}\text{L5}$  from the peak of molecular ion attributed to the illustrated structure with calculated  $m/z$  536.1691  $[\text{M} - \text{HCl}]^+$  to the  $\text{Cu}^{\text{II}}\text{L5}$  by loss of a methane molecule with calculated  $m/z$  552.1833  $[\text{M} - \text{CH}_4 - \text{HCl}]^+$ . “M” indicates the molecular mass of 588.6350  $\text{g mol}^{-1}$ .

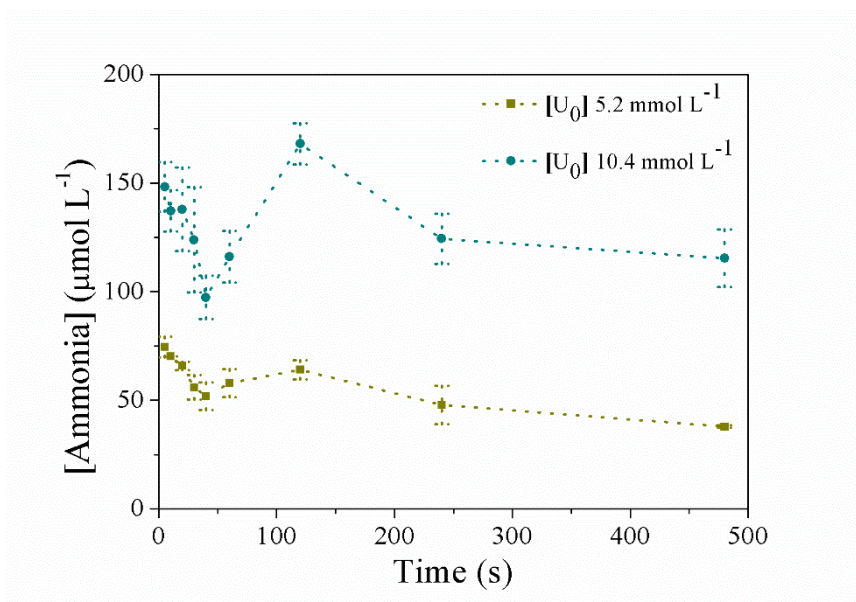

**Figure S63.**Ammonia quantification produced by Cu<sup>II</sup>L1 complex in acetonitrile/water and mixture up to 480 at 308 K.

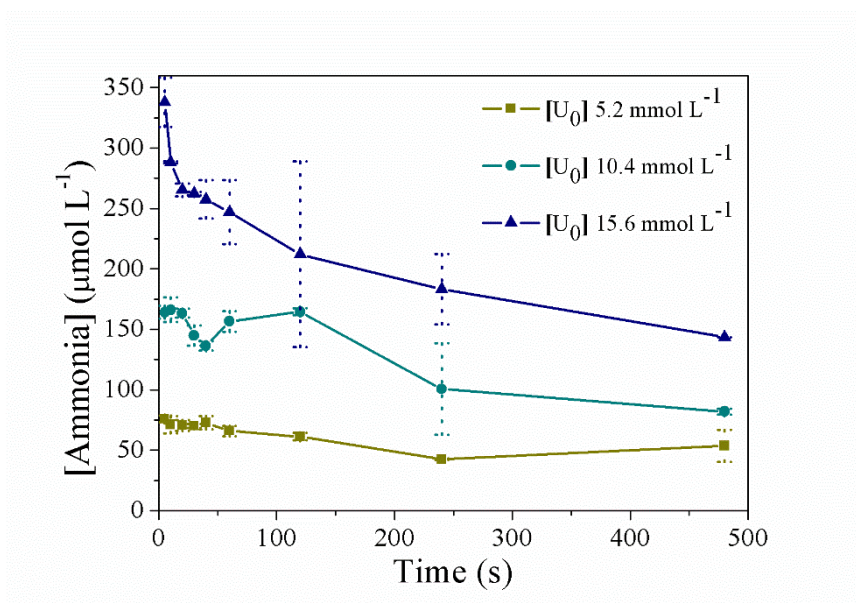

**Figure S64.**Ammonia quantification produced by Cu<sup>II</sup>L3 complex in acetonitrile/water and mixture up to 480 at 308 K.

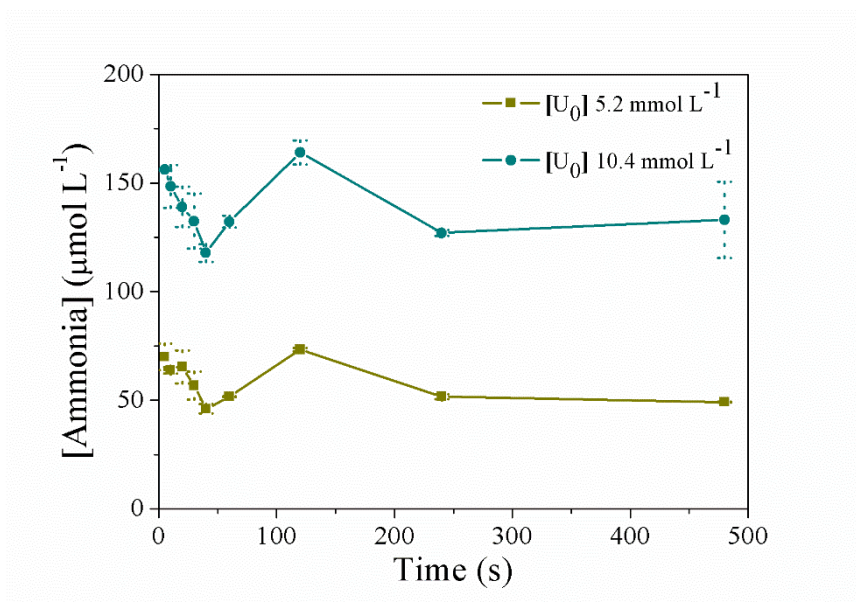

**Figure S65.**Ammonia quantification produced by Cu<sup>II</sup>L4 complex in acetonitrile/water and mixture up to 480 at 308 K.

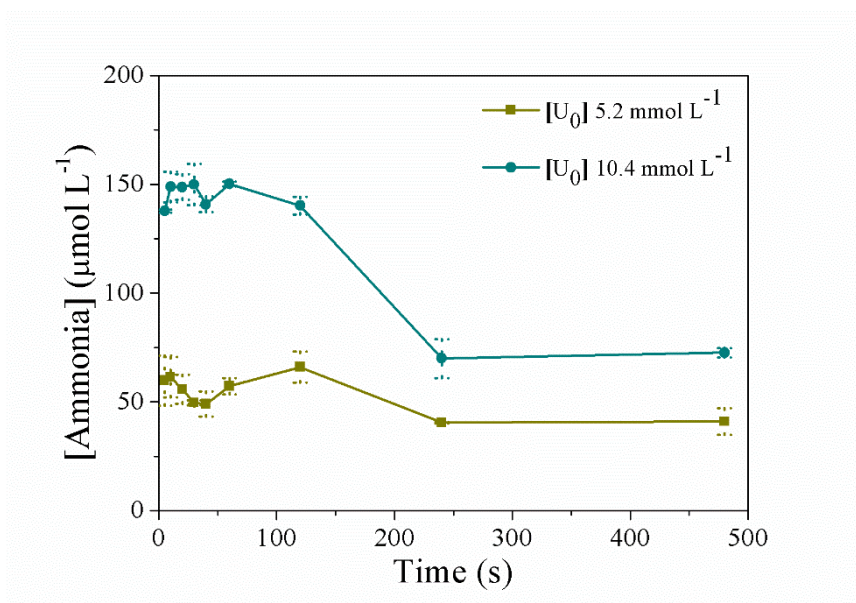

**Figure S66.**Ammonia quantification produced by Cu<sup>II</sup>L5 complex in acetonitrile/water and mixture up to 480 at 308 K.

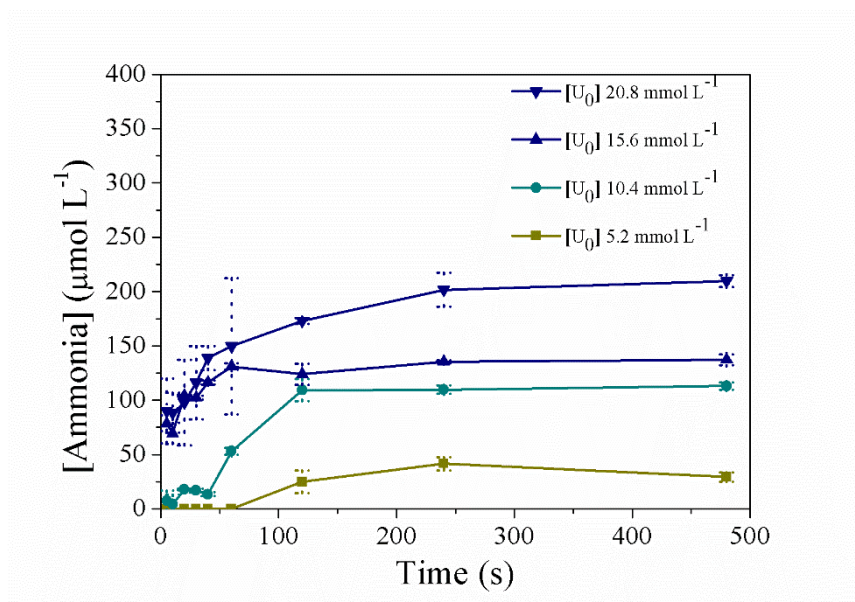

**Figure S67.**Ammonia quantification produced by  $\text{Cu}^{\text{II}}\text{L4}$  complex in methanol/water and mixture up to 480 at 308 K.

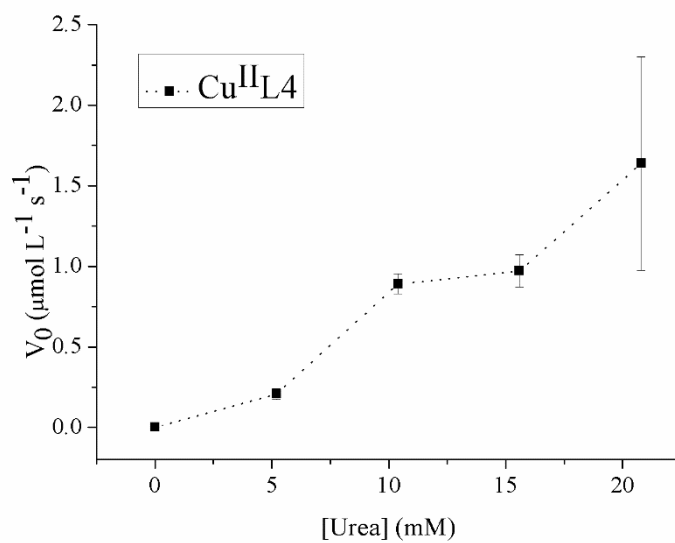

**Figure S68.**Initial velocity of ammonia production by  $\text{Cu}^{\text{II}}\text{L4}$  complex in methanol/water mixture at different urea concentrations.

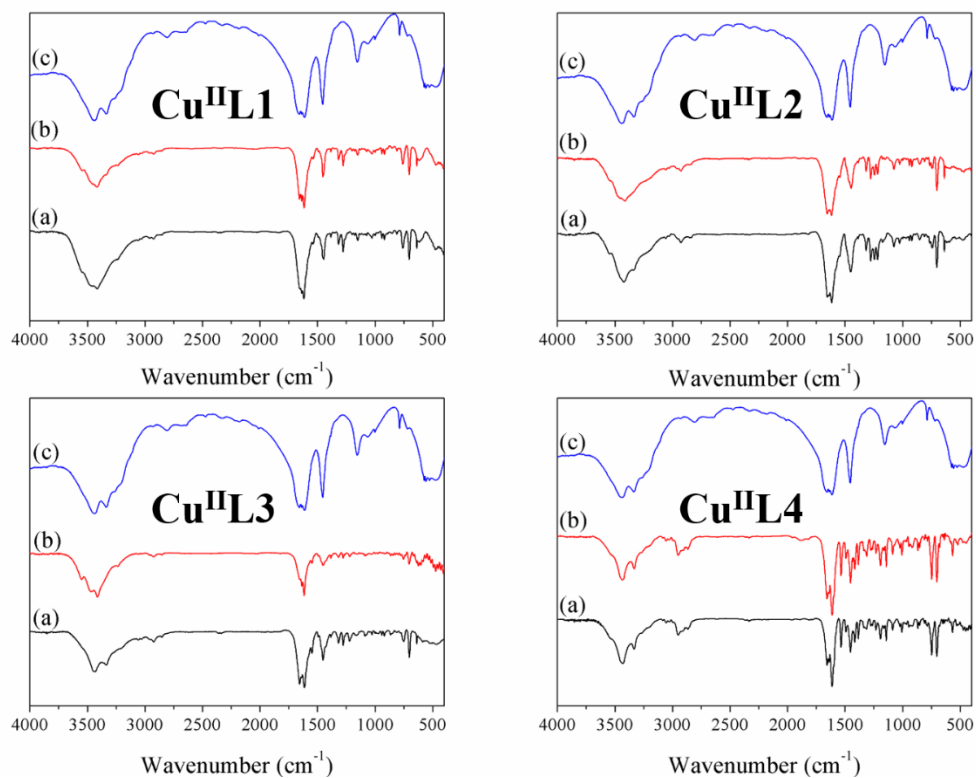

**Figure S69.** Infrared spectra of reactions of the complexes (a) 30 s, (b) 600 s and with (c) urea.

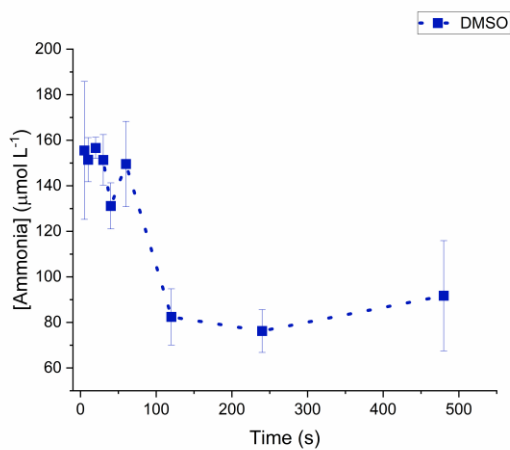

**Figure S70.** Ammonia quantification produced by  $[\text{CuIIL3}]$  complex in DMSO/water (20%) 15  $\text{mmol L}^{-1}$  urea concentration.

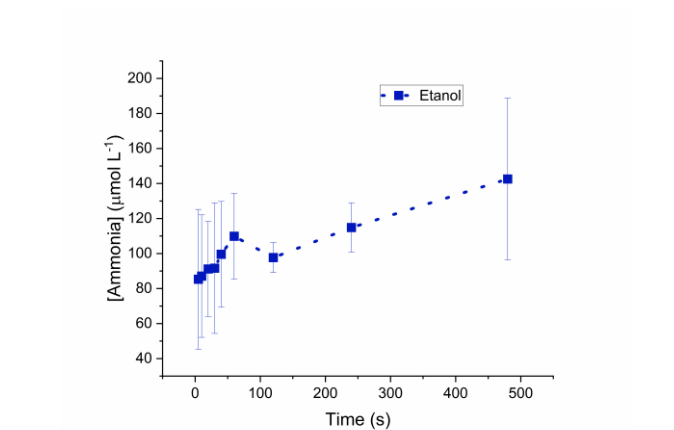

**Figure S71.** Ammonia quantification produced by [CuIIL3] complex in Ethanol/water (20%) 15mmol L<sup>-1</sup> urea concentration.

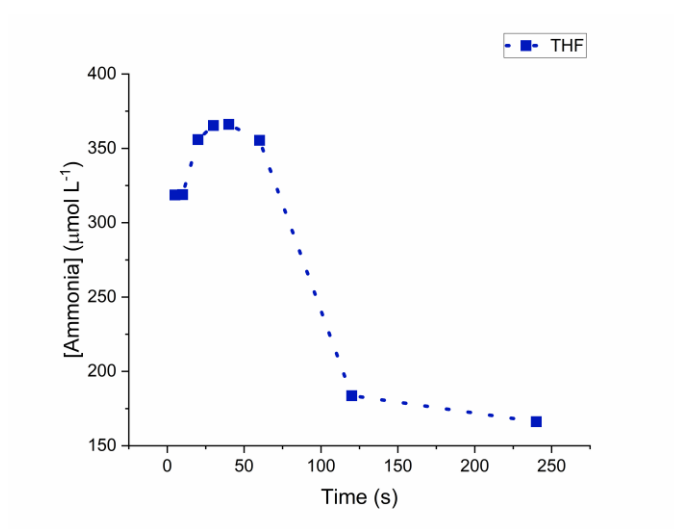

**Figure S72.** Ammonia quantification produced by [CuIIL3] complex in THF/water (20%) 15mmol L<sup>-1</sup> urea concentration.

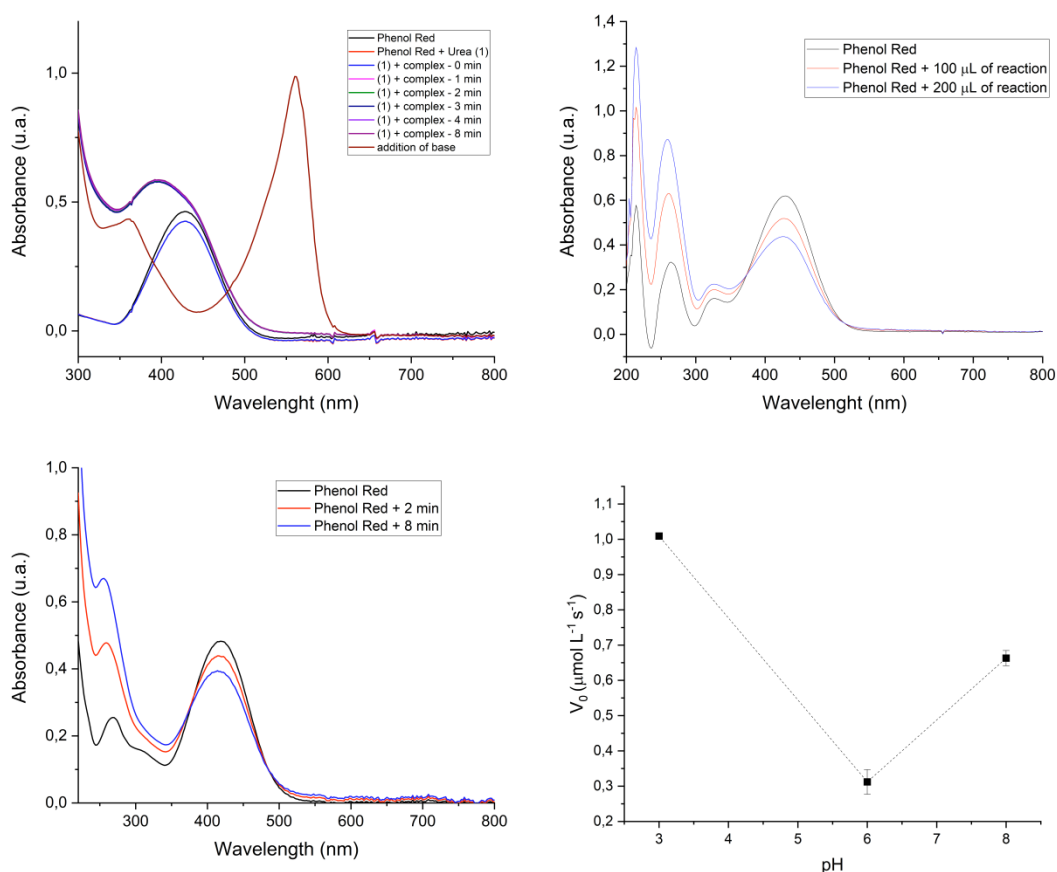

**Figure S73.** Study of the pH variation during the reaction and the effect of buffered solutions in the reaction rate. Reaction performed in MeOH/H<sub>2</sub>O (30%) mixture using [CuIIL3] complex and 15mmol L<sup>-1</sup> urea concentration, in presence of phenol red (A) and in the absence of phenol red, in which the addition of the reaction mixture was added to a phenol red solution (B). Reaction performed in ACN/H<sub>2</sub>O (30%) mixture using [CuIIL3] complex and 15mmol L<sup>-1</sup> urea concentration. The addition of the reaction mixture was added to a phenol red solution (C). Reaction rates measured from reactions performed in MeOH/H<sub>2</sub>O (30%) mixtures using [CuIIL3] complex and buffered solutions (0.1M of phosphate) of 15mmol L<sup>-1</sup> urea concentration.

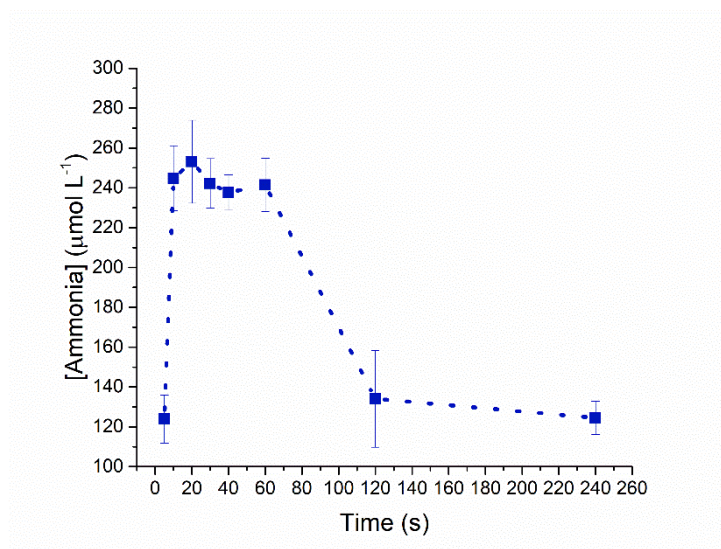

**Figure S74.**Ammonia quantification produced by CuIIL3 complex in (a) acetonitrile/water mixture (2% v:v) over 240 seconds at 308 K and at 15.6 mmolL<sup>-1</sup> concentration of urea.

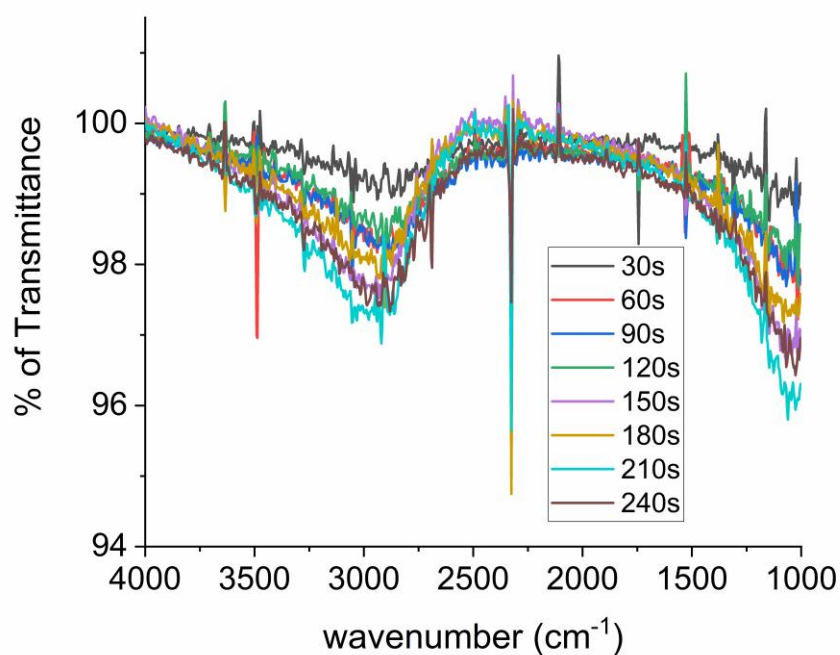

**Figure S75.***In situ* FTIR spectra of the reaction in the 4000-1000cm<sup>-1</sup> region over 240 seconds of reaction, indicating the increase of the band centered at 3000 cm<sup>-1</sup>. The reaction started with the addition of a 15mM solution of urea, reaching a 10% volume of added water to the methanolic solution of complex CuIIL3.

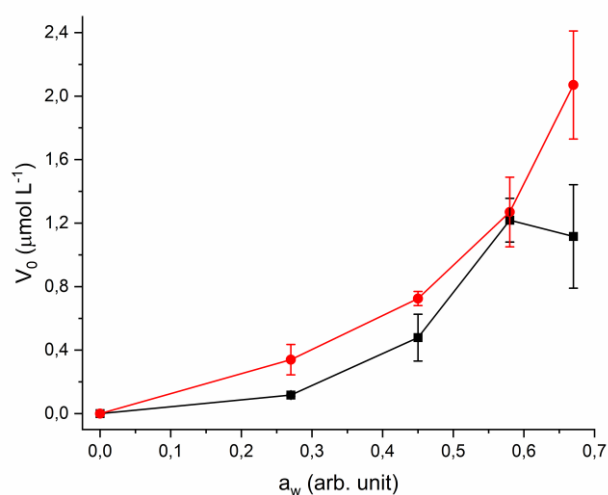

**Figure S76.**Initial rate of urea hydrolysis reaction versus urea concentration performed by Cu<sup>II</sup>L2(*red line, circles*) and Cu<sup>II</sup>L3 (*black line, squares*) with the increase in water content of the reaction from 0 to 40%

**Table S1.** Crystal data and structure refinement of L<sub>1</sub> – L<sub>3</sub>.

|                          | L <sub>1</sub>                                      | L <sub>2</sub>                                                | L <sub>3</sub>                                   |
|--------------------------|-----------------------------------------------------|---------------------------------------------------------------|--------------------------------------------------|
| <b>Empirical formula</b> | C <sub>15.5</sub> H <sub>15</sub> NO <sub>0.5</sub> | C <sub>32</sub> H <sub>32</sub> N <sub>2</sub> O <sub>2</sub> | C <sub>32</sub> H <sub>32</sub> N <sub>2</sub> O |
| <b>Formula weight</b>    | 223.28                                              | 476.59                                                        | 460.59                                           |
| <b>Colour, shapes</b>    | Yellowish green                                     | Bright yellow                                                 | Yellowish green                                  |
| <b>Temperature/K</b>     | 298                                                 | 298                                                           | 298                                              |
| <b>Crystal system</b>    | orthorhombic                                        | Orthorhombic                                                  | orthorhombic                                     |
| <b>Space group</b>       | P2 <sub>1</sub> 2 <sub>1</sub> 2 <sub>1</sub>       | P2 <sub>1</sub> 2 <sub>1</sub> 2 <sub>1</sub>                 | P2 <sub>1</sub> 2 <sub>1</sub> 2 <sub>1</sub>    |
| <b>a/Å</b>               | 11.1917(6)                                          | 11.5740(15)                                                   | 11.4294(5)                                       |
| <b>b/Å</b>               | 14.7510(8)                                          | 14.9910(8)                                                    | 14.6241(7)                                       |
| <b>c/Å</b>               | 14.8637(8)                                          | 15.1410(13)                                                   | 15.2779(7)                                       |
| <b>α/°</b>               | 90                                                  | 90                                                            | 90                                               |
| <b>β/°</b>               | 90                                                  | 90                                                            | 90                                               |

|                                                |                                                               |                                                          |                                                               |
|------------------------------------------------|---------------------------------------------------------------|----------------------------------------------------------|---------------------------------------------------------------|
| $\gamma/^\circ$                                | 90                                                            | 90                                                       | 90                                                            |
| Volume/ $\text{\AA}^3$                         | 2453.8(2)                                                     | 2627.1(4)                                                | 2553.6(2)                                                     |
| Z                                              | 8                                                             | 4                                                        | 4                                                             |
| $\rho_{\text{calc}}/\text{cm}^3$               | 1.209                                                         | 1.205                                                    | 1.198                                                         |
| $\mu/\text{mm}^{-1}$                           | 0.073                                                         | 0.075                                                    | 0.072                                                         |
| F(000)                                         | 952.0                                                         | 1016.0                                                   | 984.0                                                         |
| Crystal size/ $\text{mm}^3$                    | $0.25 \times 0.23 \times 0.2$                                 | $0.25 \times 0.2 \times 0.18$                            | $0.4 \times 0.32 \times 0.3$                                  |
| Radiation                                      | MoK $\alpha$ ( $\lambda = 0.71073$ )                          | MoK $\alpha$ ( $\lambda = 0.71073$ )                     | MoK $\alpha$ ( $\lambda = 0.71073$ )                          |
| 2 $\Theta$ range for data collection/ $^\circ$ | 5.328 to 56.542                                               | 6.064 to 52.744                                          | 5.25 to 68.828                                                |
| Index ranges                                   | $-10 \leq h \leq 14, -19 \leq k \leq 19, -15 \leq l \leq 19$  | $? \leq h \leq ?, ? \leq k \leq ?, ? \leq l \leq ?$      | $-17 \leq h \leq 13, -21 \leq k \leq 20, -10 \leq l \leq 24$  |
| Reflections collected                          | 16738                                                         | 5370                                                     | 21809                                                         |
| Independent reflections                        | 6054 [ $R_{\text{int}} = 0.0238, R_{\text{sigma}} = 0.0287$ ] | 5370 [ $R_{\text{int}} = ?, R_{\text{sigma}} = 0.0541$ ] | 9811 [ $R_{\text{int}} = 0.0205, R_{\text{sigma}} = 0.0339$ ] |
| Data/restraints/parameters                     | 6054/0/311                                                    | 5370/48/331                                              | 9811/0/318                                                    |
| Goodness-of-fit on $F^2$                       | 1.069                                                         | 1.027                                                    | 1.034                                                         |
| Final R indexes [ $I \geq 2\sigma(I)$ ]        | $R_1 = 0.0414, wR_2 = 0.0902$                                 | $R_1 = 0.0704, wR_2 = 0.1683$                            | $R_1 = 0.0527, wR_2 = 0.1109$                                 |
| Final R indexes [all data]                     | $R_1 = 0.0632, wR_2 = 0.1024$                                 | $R_1 = 0.1182, wR_2 = 0.2054$                            | $R_1 = 0.1026, wR_2 = 0.1386$                                 |
| Largest diff. peak/hole / $e \text{\AA}^{-3}$  | 0.12/-0.18                                                    | 0.18/-0.24                                               | 0.14/-0.21                                                    |
| Flack parameter                                | -0.9(6)                                                       | -1.4(10)                                                 | 0.4(6)                                                        |

**Table S2.** Bond lengthfor L<sub>1</sub> – L<sub>3</sub>.

| L <sub>1</sub>    |                    |                      |                    |                    |                      |
|-------------------|--------------------|----------------------|--------------------|--------------------|----------------------|
| Atom              | Atom               | Length/ $\text{\AA}$ | Atom               | Atom               | Length/ $\text{\AA}$ |
| N <sup>(2)</sup>  | C <sup>(7)</sup>   | 1.270(3)             | C <sup>(18)</sup>  | C <sup>(19A)</sup> |                      |
| N <sup>(2)</sup>  | C <sup>(6)</sup>   | 1.469(3)             | C <sup>(18)</sup>  | C <sup>(19)</sup>  |                      |
| N <sup>(1)</sup>  | C <sup>(1)</sup>   | 1.475(3)             | C <sup>(3)</sup>   | C <sup>(4)</sup>   |                      |
| N <sup>(1)</sup>  | C <sup>(5)</sup>   | 1.453(3)             | C <sup>(24)</sup>  | C <sup>(23)</sup>  |                      |
| N <sup>(1)</sup>  | C <sup>(4)</sup>   | 1.459(3)             | C <sup>(24)</sup>  | C <sup>(25)</sup>  |                      |
| O <sup>(1)</sup>  | C <sup>(13)</sup>  | 1.344(3)             | C <sup>(20)</sup>  | C <sup>(19)</sup>  |                      |
| C <sup>(14)</sup> | C <sup>(5)</sup>   | 1.505(3)             | C <sup>(20)</sup>  | C <sup>(21)</sup>  |                      |
| C <sup>(14)</sup> | C <sup>(15)</sup>  | 1.383(3)             | C <sup>(23A)</sup> | C <sup>(24A)</sup> |                      |
| C <sup>(14)</sup> | C <sup>(15A)</sup> | 1.377(3)             | C <sup>(13)</sup>  | C <sup>(12)</sup>  |                      |
| C <sup>(7)</sup>  | C <sup>(8)</sup>   | 1.454(3)             | C <sup>(19A)</sup> | C <sup>(20A)</sup> |                      |
| C <sup>(22)</sup> | C <sup>(23)</sup>  | 1.394(3)             | C <sup>(25)</sup>  | C <sup>(24A)</sup> |                      |
| C <sup>(22)</sup> | C <sup>(6)</sup>   | 1.531(3)             | C <sup>(9)</sup>   | C <sup>(10)</sup>  |                      |
| C <sup>(22)</sup> | C <sup>(23A)</sup> | 1.383(3)             | C <sup>(20A)</sup> | C <sup>(21)</sup>  |                      |

|                   |                   |          |                    |                    |
|-------------------|-------------------|----------|--------------------|--------------------|
| C <sup>(2)</sup>  | C <sup>(1)</sup>  | 1.540(3) | C <sup>(15)</sup>  | C <sup>(16)</sup>  |
| C <sup>(2)</sup>  | C <sup>(3)</sup>  | 1.518(3) | C <sup>(15A)</sup> | C <sup>(16A)</sup> |
| C <sup>(8)</sup>  | C <sup>(13)</sup> | 1.397(3) | C <sup>(16A)</sup> | C <sup>(17)</sup>  |
| C <sup>(8)</sup>  | C <sup>(9)</sup>  | 1.395(3) | C <sup>(11)</sup>  | C <sup>(10)</sup>  |
| C <sup>(1)</sup>  | C <sup>(6)</sup>  | 1.574(3) | C <sup>(11)</sup>  | C <sup>(12)</sup>  |
| C <sup>(18)</sup> | C <sup>(6)</sup>  | 1.528(3) | C <sup>(17)</sup>  | C <sup>(16)</sup>  |

L<sub>2</sub>

| Atom               | Atom               | Length/ Å | Atom               | Atom               | Length/ Å |
|--------------------|--------------------|-----------|--------------------|--------------------|-----------|
| N <sup>(2)</sup>   | C <sup>(7)</sup>   | 1.278(6)  | C <sup>(6)</sup>   | C <sup>(23)</sup>  | 1.526(7)  |
| N <sup>(2)</sup>   | C <sup>(6)</sup>   | 1.478(6)  | C <sup>(6)</sup>   | C <sup>(1)</sup>   | 1.581(6)  |
| O <sup>(1)</sup>   | C <sup>(13)</sup>  | 1.347(6)  | C <sup>(23)</sup>  | C <sup>(24A)</sup> | 1.393(7)  |
| C <sup>(7)</sup>   | C <sup>(8)</sup>   | 1.457(7)  | C <sup>(15)</sup>  | C <sup>(16A)</sup> | 1.381(11) |
| O <sup>(2)</sup>   | C <sup>(12)</sup>  | 1.367(6)  | C <sup>(15)</sup>  | C <sup>(16)</sup>  | 1.357(10) |
| O <sup>(2)</sup>   | C <sup>(14)</sup>  | 1.421(8)  | C <sup>(9)</sup>   | C <sup>(10)</sup>  | 1.364(9)  |
| C <sup>(20A)</sup> | C <sup>(19)</sup>  | 1.395(8)  | C <sup>(1)</sup>   | C <sup>(2)</sup>   | 1.544(7)  |
| C <sup>(20A)</sup> | C <sup>(21A)</sup> | 1.366(7)  | C <sup>(21A)</sup> | C <sup>(22)</sup>  | 1.364(8)  |
| C <sup>(8)</sup>   | C <sup>(13)</sup>  | 1.395(7)  | C <sup>(11)</sup>  | C <sup>(10)</sup>  | 1.387(9)  |
| C <sup>(8)</sup>   | C <sup>(9)</sup>   | 1.396(7)  | C <sup>(2)</sup>   | C <sup>(3)</sup>   | 1.525(9)  |
| N <sup>(1)</sup>   | C <sup>(5)</sup>   | 1.462(7)  | C <sup>(22)</sup>  | C <sup>(21)</sup>  | 1.377(9)  |
| N <sup>(1)</sup>   | C <sup>(1)</sup>   | 1.474(6)  | C <sup>(24A)</sup> | C <sup>(25A)</sup> | 1.372(8)  |
| N <sup>(1)</sup>   | C <sup>(4)</sup>   | 1.470(8)  | C <sup>(20)</sup>  | C <sup>(21)</sup>  | 1.380(8)  |
| C <sup>(19)</sup>  | C <sup>(6)</sup>   | 1.530(7)  | C <sup>(4)</sup>   | C <sup>(3)</sup>   | 1.506(8)  |
| C <sup>(19)</sup>  | C <sup>(20)</sup>  | 1.374(7)  | C <sup>(16A)</sup> | C <sup>(17A)</sup> | 1.347(13) |
| C <sup>(5)</sup>   | C <sup>(15)</sup>  | 1.505(8)  | C <sup>(25A)</sup> | C <sup>(26)</sup>  | 1.381(10) |
| C <sup>(13)</sup>  | C <sup>(12)</sup>  | 1.408(7)  | C <sup>(25)</sup>  | C <sup>(26)</sup>  | 1.365(10) |
| C <sup>(12)</sup>  | C <sup>(11)</sup>  | 1.363(7)  | C <sup>(16)</sup>  | C <sup>(17)</sup>  | 1.410(10) |
| C <sup>(24)</sup>  | C <sup>(23)</sup>  | 1.406(7)  | C <sup>(17A)</sup> | C <sup>(18)</sup>  | 1.340(16) |
| C <sup>(24)</sup>  | C <sup>(25)</sup>  | 1.375(8)  | C <sup>(17)</sup>  | C <sup>(18)</sup>  | 1.379(16) |

L<sub>3</sub>

| Atom              | Atom              | Length/ Å | Atom              | Atom              | Length/ Å |
|-------------------|-------------------|-----------|-------------------|-------------------|-----------|
| O <sup>(34)</sup> | C <sup>(6)</sup>  | 1.346(3)  | C <sup>(22)</sup> | C <sup>(27)</sup> | 1.370(3)  |
| N <sup>(8)</sup>  | C <sup>(7)</sup>  | 1.272(3)  | C <sup>(15)</sup> | C <sup>(14)</sup> | 1.375(3)  |
| N <sup>(8)</sup>  | C <sup>(9)</sup>  | 1.474(2)  | C <sup>(33)</sup> | C <sup>(32)</sup> | 1.377(3)  |
| N <sup>(20)</sup> | C <sup>(16)</sup> | 1.474(3)  | C <sup>(14)</sup> | C <sup>(13)</sup> | 1.365(3)  |
| N <sup>(20)</sup> | C <sup>(21)</sup> | 1.454(3)  | C <sup>(11)</sup> | C <sup>(12)</sup> | 1.377(3)  |
| N <sup>(20)</sup> | C <sup>(19)</sup> | 1.461(3)  | C <sup>(5)</sup>  | C <sup>(4)</sup>  | 1.368(4)  |
| C <sup>(7)</sup>  | C <sup>(1)</sup>  | 1.454(3)  | C <sup>(5)</sup>  | C <sup>(35)</sup> | 1.500(4)  |
| C <sup>(10)</sup> | C <sup>(9)</sup>  | 1.528(3)  | C <sup>(17)</sup> | C <sup>(18)</sup> | 1.518(3)  |
| C <sup>(10)</sup> | C <sup>(15)</sup> | 1.390(3)  | C <sup>(13)</sup> | C <sup>(12)</sup> | 1.374(4)  |
| C <sup>(10)</sup> | C <sup>(11)</sup> | 1.386(3)  | C <sup>(29)</sup> | C <sup>(30)</sup> | 1.386(4)  |
| C <sup>(1)</sup>  | C <sup>(6)</sup>  | 1.400(3)  | C <sup>(19)</sup> | C <sup>(18)</sup> | 1.507(3)  |
| C <sup>(1)</sup>  | C <sup>(2)</sup>  | 1.390(3)  | C <sup>(32)</sup> | C <sup>(31)</sup> | 1.370(4)  |
| C <sup>(16)</sup> | C <sup>(9)</sup>  | 1.575(3)  | C <sup>(23)</sup> | C <sup>(24)</sup> | 1.378(4)  |
| C <sup>(16)</sup> | C <sup>(17)</sup> | 1.542(3)  | C <sup>(27)</sup> | C <sup>(26)</sup> | 1.403(4)  |
| C <sup>(28)</sup> | C <sup>(9)</sup>  | 1.528(3)  | C <sup>(4)</sup>  | C <sup>(3)</sup>  | 1.374(4)  |
| C <sup>(28)</sup> | C <sup>(33)</sup> | 1.393(3)  | C <sup>(2)</sup>  | C <sup>(3)</sup>  | 1.375(4)  |
| C <sup>(28)</sup> | C <sup>(29)</sup> | 1.387(3)  | C <sup>(31)</sup> | C <sup>(30)</sup> | 1.368(5)  |

|                   |                   |          |                   |                   |          |
|-------------------|-------------------|----------|-------------------|-------------------|----------|
| C <sup>(6)</sup>  | C <sup>(5)</sup>  | 1.396(3) | C <sup>(26)</sup> | C <sup>(25)</sup> | 1.385(5) |
| C <sup>(22)</sup> | C <sup>(21)</sup> | 1.511(3) | C <sup>(25)</sup> | C <sup>(24)</sup> | 1.348(5) |
| C <sup>(22)</sup> | C <sup>(23)</sup> | 1.387(3) |                   |                   |          |

**Table S3.** Bond angles for L<sub>1</sub> – L<sub>3</sub>.

| L <sub>1</sub>     |                    |                   |            |                    |                    |                    |            |
|--------------------|--------------------|-------------------|------------|--------------------|--------------------|--------------------|------------|
| Atom               | Atom               | Atom              | Length/ Å  | Atom               | Atom               | Atom               | Length/ Å  |
| C <sup>(7)</sup>   | N <sup>(2)</sup>   | C <sup>(6)</sup>  | 123.37(18) | N <sup>(2)</sup>   | C <sup>(6)</sup>   | C <sup>(22)</sup>  | 113.37(16) |
| C <sup>(5)</sup>   | N <sup>(1)</sup>   | C <sup>(1)</sup>  | 114.34(17) | N <sup>(2)</sup>   | C <sup>(6)</sup>   | C <sup>(1)</sup>   | 104.95(16) |
| C <sup>(5)</sup>   | N <sup>(1)</sup>   | C <sup>(4)</sup>  | 112.83(18) | N <sup>(2)</sup>   | C <sup>(6)</sup>   | C <sup>(18)</sup>  | 109.24(16) |
| C <sup>(4)</sup>   | N <sup>(1)</sup>   | C <sup>(1)</sup>  | 108.85(17) | C <sup>(22)</sup>  | C <sup>(6)</sup>   | C <sup>(1)</sup>   | 112.57(15) |
| C <sup>(15)</sup>  | C <sup>(14)</sup>  | C <sup>(5)</sup>  | 118.9(2)   | C <sup>(18)</sup>  | C <sup>(6)</sup>   | C <sup>(22)</sup>  | 108.44(17) |
| C <sup>(15A)</sup> | C <sup>(14)</sup>  | C <sup>(5)</sup>  | 122.2(2)   | C <sup>(18)</sup>  | C <sup>(6)</sup>   | C <sup>(1)</sup>   | 108.10(16) |
| C <sup>(15A)</sup> | C <sup>(14)</sup>  | C <sup>(15)</sup> | 118.8(2)   | C <sup>(24A)</sup> | C <sup>(23A)</sup> | C <sup>(22)</sup>  | 120.8(2)   |
| N <sup>(2)</sup>   | C <sup>(7)</sup>   | C <sup>(8)</sup>  | 121.1(2)   | O <sup>(1)</sup>   | C <sup>(13)</sup>  | C <sup>(8)</sup>   | 121.4(2)   |
| C <sup>(23)</sup>  | C <sup>(22)</sup>  | C <sup>(6)</sup>  | 117.91(18) | O <sup>(1)</sup>   | C <sup>(13)</sup>  | C <sup>(12)</sup>  | 119.1(3)   |
| C <sup>(23A)</sup> | C <sup>(22)</sup>  | C <sup>(23)</sup> | 117.5(2)   | C <sup>(12)</sup>  | C <sup>(13)</sup>  | C <sup>(8)</sup>   | 119.5(3)   |
| C <sup>(23A)</sup> | C <sup>(22)</sup>  | C <sup>(6)</sup>  | 124.55(19) | C <sup>(20A)</sup> | C <sup>(19A)</sup> | C <sup>(18)</sup>  | 120.8(2)   |
| C <sup>(3)</sup>   | C <sup>(2)</sup>   | C <sup>(1)</sup>  | 104.79(17) | C <sup>(24)</sup>  | C <sup>(25)</sup>  | C <sup>(24A)</sup> | 119.8(2)   |
| C <sup>(13)</sup>  | C <sup>(8)</sup>   | C <sup>(7)</sup>  | 120.9(2)   | C <sup>(20)</sup>  | C <sup>(19)</sup>  | C <sup>(18)</sup>  | 121.0(2)   |
| C <sup>(9)</sup>   | C <sup>(8)</sup>   | C <sup>(7)</sup>  | 120.1(2)   | C <sup>(10)</sup>  | C <sup>(9)</sup>   | C <sup>(8)</sup>   | 120.7(3)   |
| C <sup>(9)</sup>   | C <sup>(8)</sup>   | C <sup>(13)</sup> | 118.8(2)   | C <sup>(21)</sup>  | C <sup>(20A)</sup> | C <sup>(19A)</sup> | 120.9(2)   |
| N <sup>(1)</sup>   | C <sup>(1)</sup>   | C <sup>(2)</sup>  | 105.32(17) | N <sup>(1)</sup>   | C <sup>(4)</sup>   | C <sup>(3)</sup>   | 104.89(19) |
| N <sup>(1)</sup>   | C <sup>(1)</sup>   | C <sup>(6)</sup>  | 111.00(16) | C <sup>(25)</sup>  | C <sup>(24A)</sup> | C <sup>(23A)</sup> | 120.5(2)   |
| C <sup>(2)</sup>   | C <sup>(1)</sup>   | C <sup>(6)</sup>  | 113.70(17) | C <sup>(20)</sup>  | C <sup>(21)</sup>  | C <sup>(20A)</sup> | 118.9(2)   |
| C <sup>(19A)</sup> | C <sup>(18)</sup>  | C <sup>(6)</sup>  | 123.1(2)   | C <sup>(16)</sup>  | C <sup>(15)</sup>  | C <sup>(14)</sup>  | 121.2(3)   |
| C <sup>(19A)</sup> | C <sup>(18)</sup>  | C <sup>(19)</sup> | 117.8(2)   | C <sup>(14)</sup>  | C <sup>(15A)</sup> | C <sup>(16A)</sup> | 120.0(3)   |
| C <sup>(19)</sup>  | C <sup>(18)</sup>  | C <sup>(6)</sup>  | 118.81(19) | C <sup>(17)</sup>  | C <sup>(16A)</sup> | C <sup>(15A)</sup> | 119.8(3)   |
| N <sup>(1)</sup>   | C <sup>(5)</sup>   | C <sup>(14)</sup> | 113.78(19) | C <sup>(12)</sup>  | C <sup>(11)</sup>  | C <sup>(10)</sup>  | 121.4(3)   |
| C <sup>(4)</sup>   | C <sup>(3)</sup>   | C <sup>(2)</sup>  | 102.81(19) | C <sup>(11)</sup>  | C <sup>(10)</sup>  | C <sup>(9)</sup>   | 119.4(3)   |
| C <sup>(25)</sup>  | C <sup>(24)</sup>  | C <sup>(23)</sup> | 119.9(2)   | C <sup>(11)</sup>  | C <sup>(12)</sup>  | C <sup>(13)</sup>  | 120.2(3)   |
| C <sup>(24)</sup>  | C <sup>(23)</sup>  | C <sup>(22)</sup> | 121.6(2)   | C <sup>(16)</sup>  | C <sup>(17)</sup>  | C <sup>(16A)</sup> | 120.3(3)   |
| C <sup>(21)</sup>  | C <sup>(20)</sup>  | C <sup>(19)</sup> | 120.6(2)   | C <sup>(17)</sup>  | C <sup>(16)</sup>  | C <sup>(15)</sup>  | 120.0(3)   |
| L <sub>2</sub>     |                    |                   |            |                    |                    |                    |            |
| Atom               | Atom               | Atom              | Length/ Å  | Atom               | Atom               | Atom               | Length/ Å  |
| C <sup>(7)</sup>   | N <sup>(2)</sup>   | C <sup>(6)</sup>  | 121.2(4)   | C <sup>(24A)</sup> | C <sup>(23)</sup>  | C <sup>(24)</sup>  | 117.3(5)   |
| N <sup>(2)</sup>   | C <sup>(7)</sup>   | C <sup>(8)</sup>  | 121.9(4)   | C <sup>(24A)</sup> | C <sup>(23)</sup>  | C <sup>(6)</sup>   | 125.1(5)   |
| C <sup>(12)</sup>  | O <sup>(2)</sup>   | C <sup>(14)</sup> | 116.1(5)   | C <sup>(16A)</sup> | C <sup>(15)</sup>  | C <sup>(5)</sup>   | 120.0(8)   |
| C <sup>(21A)</sup> | C <sup>(20A)</sup> | C <sup>(19)</sup> | 121.3(5)   | C <sup>(16)</sup>  | C <sup>(15)</sup>  | C <sup>(5)</sup>   | 123.5(6)   |
| C <sup>(13)</sup>  | C <sup>(8)</sup>   | C <sup>(7)</sup>  | 121.0(4)   | C <sup>(16)</sup>  | C <sup>(15)</sup>  | C <sup>(16A)</sup> | 116.5(7)   |
| C <sup>(13)</sup>  | C <sup>(8)</sup>   | C <sup>(9)</sup>  | 119.3(5)   | C <sup>(10)</sup>  | C <sup>(9)</sup>   | C <sup>(8)</sup>   | 120.5(5)   |
| C <sup>(9)</sup>   | C <sup>(8)</sup>   | C <sup>(7)</sup>  | 119.7(5)   | N <sup>(1)</sup>   | C <sup>(1)</sup>   | C <sup>(6)</sup>   | 111.7(3)   |

|                    |                   |                    |          |                    |                    |                    |           |
|--------------------|-------------------|--------------------|----------|--------------------|--------------------|--------------------|-----------|
| C <sup>(5)</sup>   | N <sup>(1)</sup>  | C <sup>(1)</sup>   | 113.9(4) | N <sup>(1)</sup>   | C <sup>(1)</sup>   | C <sup>(2)</sup>   | 105.1(4)  |
| C <sup>(5)</sup>   | N <sup>(1)</sup>  | C <sup>(4)</sup>   | 112.9(4) | C <sup>(2)</sup>   | C <sup>(1)</sup>   | C <sup>(6)</sup>   | 114.1(4)  |
| C <sup>(4)</sup>   | N <sup>(1)</sup>  | C <sup>(1)</sup>   | 108.1(4) | C <sup>(22)</sup>  | C <sup>(21A)</sup> | C <sup>(20A)</sup> | 121.0(5)  |
| C <sup>(20A)</sup> | C <sup>(19)</sup> | C <sup>(6)</sup>   | 118.6(4) | C <sup>(12)</sup>  | C <sup>(11)</sup>  | C <sup>(10)</sup>  | 121.6(6)  |
| C <sup>(20)</sup>  | C <sup>(19)</sup> | C <sup>(20A)</sup> | 117.2(5) | C <sup>(3)</sup>   | C <sup>(2)</sup>   | C <sup>(1)</sup>   | 104.4(4)  |
| C <sup>(20)</sup>  | C <sup>(19)</sup> | C <sup>(6)</sup>   | 124.1(5) | C <sup>(21A)</sup> | C <sup>(22)</sup>  | C <sup>(21)</sup>  | 118.7(5)  |
| N <sup>(1)</sup>   | C <sup>(5)</sup>  | C <sup>(15)</sup>  | 113.1(5) | C <sup>(25A)</sup> | C <sup>(24A)</sup> | C <sup>(23)</sup>  | 120.9(6)  |
| O <sup>(1)</sup>   | C <sup>(13)</sup> | C <sup>(8)</sup>   | 122.3(5) | C <sup>(19)</sup>  | C <sup>(20)</sup>  | C <sup>(21)</sup>  | 121.4(5)  |
| O <sup>(1)</sup>   | C <sup>(13)</sup> | C <sup>(12)</sup>  | 117.9(4) | N <sup>(1)</sup>   | C <sup>(4)</sup>   | C <sup>(3)</sup>   | 104.6(4)  |
| C <sup>(8)</sup>   | C <sup>(13)</sup> | C <sup>(12)</sup>  | 119.7(4) | C <sup>(22)</sup>  | C <sup>(21)</sup>  | C <sup>(20)</sup>  | 120.5(5)  |
| O <sup>(2)</sup>   | C <sup>(12)</sup> | C <sup>(13)</sup>  | 115.7(4) | C <sup>(17A)</sup> | C <sup>(16A)</sup> | C <sup>(15)</sup>  | 123.7(12) |
| C <sup>(11)</sup>  | C <sup>(12)</sup> | O <sup>(2)</sup>   | 125.3(5) | C <sup>(9)</sup>   | C <sup>(10)</sup>  | C <sup>(11)</sup>  | 119.7(5)  |
| C <sup>(11)</sup>  | C <sup>(12)</sup> | C <sup>(13)</sup>  | 119.0(5) | C <sup>(24A)</sup> | C <sup>(25A)</sup> | C <sup>(26)</sup>  | 120.4(6)  |
| C <sup>(25)</sup>  | C <sup>(24)</sup> | C <sup>(23)</sup>  | 121.3(5) | C <sup>(26)</sup>  | C <sup>(25)</sup>  | C <sup>(24)</sup>  | 119.9(6)  |
| N <sup>(2)</sup>   | C <sup>(6)</sup>  | C <sup>(19)</sup>  | 108.9(4) | C <sup>(4)</sup>   | C <sup>(3)</sup>   | C <sup>(2)</sup>   | 101.2(5)  |
| N <sup>(2)</sup>   | C <sup>(6)</sup>  | C <sup>(23)</sup>  | 113.2(4) | C <sup>(25)</sup>  | C <sup>(26)</sup>  | C <sup>(25A)</sup> | 120.1(6)  |
| N <sup>(2)</sup>   | C <sup>(6)</sup>  | C <sup>(1)</sup>   | 104.9(4) | C <sup>(15)</sup>  | C <sup>(16)</sup>  | C <sup>(17)</sup>  | 121.2(9)  |
| C <sup>(19)</sup>  | C <sup>(6)</sup>  | C <sup>(1)</sup>   | 107.8(3) | C <sup>(18)</sup>  | C <sup>(17A)</sup> | C <sup>(16A)</sup> | 119.4(11) |
| C <sup>(23)</sup>  | C <sup>(6)</sup>  | C <sup>(19)</sup>  | 109.0(4) | C <sup>(18)</sup>  | C <sup>(17)</sup>  | C <sup>(16)</sup>  | 118.5(11) |
| C <sup>(23)</sup>  | C <sup>(6)</sup>  | C <sup>(1)</sup>   | 112.8(4) | C <sup>(17A)</sup> | C <sup>(18)</sup>  | C <sup>(17)</sup>  | 120.6(9)  |
| C <sup>(24)</sup>  | C <sup>(23)</sup> | C <sup>(6)</sup>   | 117.6(4) |                    |                    |                    |           |

**L<sub>3</sub>**

| Atom              | Atom              | Atom              | Length/ Å  | Atom              | Atom              | Atom              | Length/ Å  |
|-------------------|-------------------|-------------------|------------|-------------------|-------------------|-------------------|------------|
| C <sup>(7)</sup>  | N <sup>(8)</sup>  | C <sup>(9)</sup>  | 121.90(16) | C <sup>(27)</sup> | C <sup>(22)</sup> | C <sup>(21)</sup> | 122.8(2)   |
| C <sup>(21)</sup> | N <sup>(20)</sup> | C <sup>(16)</sup> | 113.40(16) | C <sup>(27)</sup> | C <sup>(22)</sup> | C <sup>(23)</sup> | 119.2(2)   |
| C <sup>(21)</sup> | N <sup>(20)</sup> | C <sup>(19)</sup> | 112.86(18) | C <sup>(14)</sup> | C <sup>(15)</sup> | C <sup>(10)</sup> | 121.4(2)   |
| C <sup>(19)</sup> | N <sup>(20)</sup> | C <sup>(16)</sup> | 108.49(17) | C <sup>(32)</sup> | C <sup>(33)</sup> | C <sup>(28)</sup> | 121.6(2)   |
| N <sup>(8)</sup>  | C <sup>(7)</sup>  | C <sup>(1)</sup>  | 121.71(19) | C <sup>(13)</sup> | C <sup>(14)</sup> | C <sup>(15)</sup> | 120.4(2)   |
| C <sup>(15)</sup> | C <sup>(10)</sup> | C <sup>(9)</sup>  | 119.32(18) | C <sup>(12)</sup> | C <sup>(11)</sup> | C <sup>(10)</sup> | 120.7(2)   |
| C <sup>(11)</sup> | C <sup>(10)</sup> | C <sup>(9)</sup>  | 122.90(18) | C <sup>(6)</sup>  | C <sup>(5)</sup>  | C <sup>(35)</sup> | 119.9(3)   |
| C <sup>(11)</sup> | C <sup>(10)</sup> | C <sup>(15)</sup> | 117.5(2)   | C <sup>(4)</sup>  | C <sup>(5)</sup>  | C <sup>(6)</sup>  | 118.0(2)   |
| C <sup>(6)</sup>  | C <sup>(1)</sup>  | C <sup>(7)</sup>  | 121.25(19) | C <sup>(4)</sup>  | C <sup>(5)</sup>  | C <sup>(35)</sup> | 122.0(2)   |
| C <sup>(2)</sup>  | C <sup>(1)</sup>  | C <sup>(7)</sup>  | 119.6(2)   | N <sup>(20)</sup> | C <sup>(21)</sup> | C <sup>(22)</sup> | 114.29(18) |
| C <sup>(2)</sup>  | C <sup>(1)</sup>  | C <sup>(6)</sup>  | 119.1(2)   | C <sup>(18)</sup> | C <sup>(17)</sup> | C <sup>(16)</sup> | 104.42(17) |
| N <sup>(20)</sup> | C <sup>(16)</sup> | C <sup>(9)</sup>  | 111.84(15) | C <sup>(14)</sup> | C <sup>(13)</sup> | C <sup>(12)</sup> | 119.1(2)   |
| N <sup>(20)</sup> | C <sup>(16)</sup> | C <sup>(17)</sup> | 105.04(16) | C <sup>(30)</sup> | C <sup>(29)</sup> | C <sup>(28)</sup> | 120.7(3)   |
| C <sup>(17)</sup> | C <sup>(16)</sup> | C <sup>(9)</sup>  | 113.99(17) | N <sup>(20)</sup> | C <sup>(19)</sup> | C <sup>(18)</sup> | 104.49(18) |
| C <sup>(33)</sup> | C <sup>(28)</sup> | C <sup>(9)</sup>  | 117.81(18) | C <sup>(13)</sup> | C <sup>(12)</sup> | C <sup>(11)</sup> | 120.9(2)   |
| C <sup>(29)</sup> | C <sup>(28)</sup> | C <sup>(9)</sup>  | 124.9(2)   | C <sup>(31)</sup> | C <sup>(32)</sup> | C <sup>(33)</sup> | 120.1(3)   |
| C <sup>(29)</sup> | C <sup>(28)</sup> | C <sup>(33)</sup> | 117.3(2)   | C <sup>(19)</sup> | C <sup>(18)</sup> | C <sup>(17)</sup> | 101.79(19) |
| N <sup>(8)</sup>  | C <sup>(9)</sup>  | C <sup>(10)</sup> | 109.08(15) | C <sup>(24)</sup> | C <sup>(23)</sup> | C <sup>(22)</sup> | 120.8(3)   |
| N <sup>(8)</sup>  | C <sup>(9)</sup>  | C <sup>(16)</sup> | 105.39(15) | C <sup>(22)</sup> | C <sup>(27)</sup> | C <sup>(26)</sup> | 119.7(3)   |
| N <sup>(8)</sup>  | C <sup>(9)</sup>  | C <sup>(28)</sup> | 112.45(16) | C <sup>(5)</sup>  | C <sup>(4)</sup>  | C <sup>(3)</sup>  | 122.5(2)   |
| C <sup>(10)</sup> | C <sup>(9)</sup>  | C <sup>(16)</sup> | 107.89(15) | C <sup>(3)</sup>  | C <sup>(2)</sup>  | C <sup>(1)</sup>  | 120.2(3)   |
| C <sup>(10)</sup> | C <sup>(9)</sup>  | C <sup>(28)</sup> | 109.74(16) | C <sup>(30)</sup> | C <sup>(31)</sup> | C <sup>(32)</sup> | 119.6(2)   |
| C <sup>(28)</sup> | C <sup>(9)</sup>  | C <sup>(16)</sup> | 112.10(15) | C <sup>(25)</sup> | C <sup>(26)</sup> | C <sup>(27)</sup> | 119.5(3)   |
| O <sup>(34)</sup> | C <sup>(6)</sup>  | C <sup>(1)</sup>  | 121.36(19) | C <sup>(31)</sup> | C <sup>(30)</sup> | C <sup>(29)</sup> | 120.7(3)   |

|                   |                   |                   |          |                   |                   |                   |          |
|-------------------|-------------------|-------------------|----------|-------------------|-------------------|-------------------|----------|
| O <sup>(34)</sup> | C <sup>(6)</sup>  | C <sup>(5)</sup>  | 118.1(2) | C <sup>(24)</sup> | C <sup>(25)</sup> | C <sup>(26)</sup> | 120.6(3) |
| C <sup>(5)</sup>  | C <sup>(6)</sup>  | C <sup>(1)</sup>  | 120.6(2) | C <sup>(4)</sup>  | C <sup>(3)</sup>  | C <sup>(2)</sup>  | 119.5(3) |
| C <sup>(23)</sup> | C <sup>(22)</sup> | C <sup>(21)</sup> | 117.9(2) | C <sup>(25)</sup> | C <sup>(24)</sup> | C <sup>(23)</sup> | 120.0(3) |

**Table S4.**Comparison of the main infrared bands between ligands and complexes.

| <b>Compostos</b>         | <b><math>\nu</math> C=N</b> | <b><math>\nu</math> C – O</b> | <b><math>\nu</math> C – N</b> | <b><math>\nu</math> Cu – O</b> | <b><math>\nu</math> Cu – O</b> |
|--------------------------|-----------------------------|-------------------------------|-------------------------------|--------------------------------|--------------------------------|
| <b>HL1</b>               | 1623                        | 1280                          | 1116, 1097                    | -                              | -                              |
| <b>Cu<sup>II</sup>L1</b> | 1654, 1637,<br>1617         | 1317, 1276,<br>1261           | 1089, 1074,<br>1028           | 638                            | 474                            |
| <b>HL2</b>               | 1623                        | 1269                          | 1114, 1097                    | -                              | -                              |
| <b>Cu<sup>II</sup>L2</b> | 1619                        | 1316, 1276                    | 1081, 1004                    | 638                            | 557                            |
| <b>HL3</b>               | 1619                        | 1265                          | 1112, 1099                    | -                              | -                              |
| <b>Cu<sup>II</sup>L3</b> | 1654                        | 1317, 1276                    | 638                           | 638                            | 567                            |
| <b>HL4</b>               | 1617                        | 1264                          | 1143, 1114                    | -                              | -                              |
| <b>Cu<sup>II</sup>L4</b> | 1611                        | 1336, 1326                    | 1143, 1085                    | -                              | 567                            |
| <b>HL5</b>               | 1621                        | 1272                          | 1114, 1015                    | -                              | -                              |
| <b>Cu<sup>II</sup>L5</b> | 1654, 1615                  | 1317, 1278                    | 1073, 1028                    | 638                            | -                              |

**Table S5.** Comparison of transitions in the ultravioleta and visible region between ligands and complexes.

| Compostos                | $\pi \rightarrow \pi^*_{C=C}$<br>$\lambda$ nm ( $\epsilon_{\max}$<br>$\text{mol}^{-1} \text{cm}^{-1}$<br>L) | $\pi \rightarrow \pi^*_{C=C}$<br>$\lambda$ nm ( $\epsilon_{\max}$<br>$\text{mol}^{-1} \text{cm}^{-1}$<br>L) | $\pi \rightarrow \pi^*_{C=N}$<br>$\lambda$ nm ( $\epsilon_{\max}$<br>$\text{mol}^{-1} \text{cm}^{-1}$<br>L) | $n \rightarrow \pi^*_{C=C}$<br>$\lambda$ nm ( $\epsilon_{\max}$<br>$\text{mol}^{-1} \text{cm}^{-1}$<br>L) | d – d<br>$\lambda$ nm ( $\epsilon_{\max}$<br>$\text{mol}^{-1} \text{cm}^{-1}$<br>L) |
|--------------------------|-------------------------------------------------------------------------------------------------------------|-------------------------------------------------------------------------------------------------------------|-------------------------------------------------------------------------------------------------------------|-----------------------------------------------------------------------------------------------------------|-------------------------------------------------------------------------------------|
| <b>HL1</b>               | 240 (8140)                                                                                                  | 260 (9513)                                                                                                  | 320 (3729)                                                                                                  | 414 (450)                                                                                                 | -                                                                                   |
| <b>Cu<sup>II</sup>L1</b> | 248 (18246)                                                                                                 | 276 (16002)                                                                                                 | 380 (4383)                                                                                                  | -                                                                                                         | 636 (265)                                                                           |
| <b>HL2</b>               | 232 (27271)                                                                                                 | 262 (15775)                                                                                                 | 324 (3046)                                                                                                  | 432 (871)                                                                                                 | -                                                                                   |
| <b>Cu<sup>II</sup>L2</b> | 234 (15660)                                                                                                 | 284 (13953)                                                                                                 | 362 (2479)                                                                                                  | -                                                                                                         | 600<                                                                                |
| <b>HL3</b>               | 232 (24009)                                                                                                 | 262 (18426)                                                                                                 | 326 (5085)                                                                                                  | 420 (358)                                                                                                 | -                                                                                   |
| <b>Cu<sup>II</sup>L3</b> | 252 (19765)                                                                                                 | 280 (12308)                                                                                                 | 378 (3053)                                                                                                  | -                                                                                                         | 600 – 700                                                                           |
| <b>HL4</b>               | 232 (22025)                                                                                                 | 264 (16192)                                                                                                 | 330 (5320)                                                                                                  | 400 (269)                                                                                                 | -                                                                                   |
| <b>Cu<sup>II</sup>L4</b> | 250 (18922)                                                                                                 | 278 (12694)                                                                                                 | 332 (3959)<br>e 388<br>(4499)                                                                               | -                                                                                                         | 650 (294)                                                                           |
| <b>HL5</b>               | 232 (15984)                                                                                                 | 264 (9288)                                                                                                  | 332 (2716)                                                                                                  | 430 (622)                                                                                                 | -                                                                                   |
| <b>Cu<sup>II</sup>L5</b> | 236 (10803)                                                                                                 | 252 (15770)                                                                                                 | 356 (2348)                                                                                                  | -                                                                                                         | 600<                                                                                |

**Table S6.** Comparison of oxidation and reduction potentials due to the cyclic voltammetry of ligands and complexes.

| Compounds                | E, V             |                  |                   |                  |
|--------------------------|------------------|------------------|-------------------|------------------|
|                          | E <sub>pa1</sub> | E <sub>pa2</sub> | E <sub>pa 3</sub> | E <sub>pc1</sub> |
| <b>HL1</b>               | 0.992            | 1.531            | -                 | -                |
| <b>Cu<sup>II</sup>L1</b> | 0.776            | 1.375            | -                 | 0.723            |
| <b>HL2</b>               | 0.816            | 1.284            | 1.492             | -                |
| <b>Cu<sup>II</sup>L2</b> | 0.781            | 1.285            | -                 | 0.842            |
| <b>HL3</b>               | 0.928            | 1.424            | -                 | -                |
| <b>Cu<sup>II</sup>L3</b> | 0.821            | 1.220            | -                 | 0.814            |
| <b>HL4</b>               | 0.930            | 1.410            | -                 |                  |
| <b>Cu<sup>II</sup>L4</b> |                  |                  |                   |                  |
| <b>HL5</b>               | 0.800            | 1.260            | 1.426             | -                |
| <b>Cu<sup>II</sup>L5</b> |                  |                  |                   |                  |

**Table S7.** ESR parameters of aggregates and monomeric species of the Cu<sup>II</sup> complexes of this work in dichloromethane at 77 K.

| Compounds                | g*             |                |                | g0*             |                 |                 | A, cm <sup>-1</sup> (x10 <sup>-4</sup> ) |                |                |
|--------------------------|----------------|----------------|----------------|-----------------|-----------------|-----------------|------------------------------------------|----------------|----------------|
|                          | g <sub>x</sub> | g <sub>y</sub> | g <sub>z</sub> | g <sub>x0</sub> | g <sub>y0</sub> | g <sub>z0</sub> | A <sub>x</sub>                           | A <sub>y</sub> | A <sub>z</sub> |
| <b>Cu<sup>II</sup>L1</b> | 2.0364         | 2.0752         | 2.2115         | 2.0730          | 2.0699          | 2.1805          | 10.3                                     | 12.9           | 187.6          |
| <b>Cu<sup>II</sup>L2</b> | 2.0292         | 2.0926         | 2.2498         | 2.1540          | 2.1066          | 2.2070          | 33.1                                     | 1.3            | 158.0          |
| <b>Cu<sup>II</sup>L3</b> | 2.0339         | 2.0733         | 2.2111         | 2.0800          | 2.1771          | 2.0370          | 0.6                                      | 9.6            | 193.0          |
| <b>Cu<sup>II</sup>L4</b> | 2.0322         | 2.0779         | 2.2064         | 2.0510          | 2.1838          | 2.0400          | 0.5                                      | 15.6           | 185.4          |

|                          |        |        |        |       |        |        |     |      |       |
|--------------------------|--------|--------|--------|-------|--------|--------|-----|------|-------|
| <b>Cu<sup>II</sup>L5</b> | 2.0317 | 2.0709 | 2.2105 | 2.093 | 2.0878 | 2.2226 | 0.3 | 18.8 | 190.9 |
|--------------------------|--------|--------|--------|-------|--------|--------|-----|------|-------|

g indicates the g factor for monomeric species and g<sub>0</sub> for aggregates species.

**Table S8.** ESR parameters for the Cu<sup>II</sup> complexes of this work in acetonitrile at 298 K.

| Compounds                | g              |                |                | t <sub>corr</sub> , ps | A, cm <sup>-1</sup> (x10 <sup>-4</sup> ) |                |                |
|--------------------------|----------------|----------------|----------------|------------------------|------------------------------------------|----------------|----------------|
|                          | g <sub>x</sub> | g <sub>y</sub> | g <sub>z</sub> |                        | A <sub>x</sub>                           | A <sub>y</sub> | A <sub>z</sub> |
| <b>Cu<sup>II</sup>L1</b> | 2.0535         | 2.0531         | 2.2063         | 25.9                   | 14.53                                    | 14.06          | 198.7          |
| <b>Cu<sup>II</sup>L2</b> | 2.0695         | 2.0932         | 2.1653         | 47.6                   | 14.53                                    | 14.06          | 191.9          |
| <b>Cu<sup>II</sup>L3</b> | 2.0569         | 2.0566         | 2.2055         | 36.2                   | 14.53                                    | 14.06          | 193.8          |
| <b>Cu<sup>II</sup>L4</b> | 2.0512         | 2.0518         | 2.2063         | 36.2                   | 14.53                                    | 14.06          | 201.0          |
| <b>Cu<sup>II</sup>L5</b> | 2.0537         | 2.0537         | 2.2063         | 35.9                   | 14.53                                    | 14.06          | 201.4          |

**Table S9.** ESR parameters for the Cu<sup>II</sup> complexes of this work in acetonitrile/water (80/20) mixture at 298 K.

| Compounds                | g              |                |                | t <sub>corr</sub> , ps | A, cm <sup>-1</sup> (x10 <sup>-4</sup> ) |                |                |
|--------------------------|----------------|----------------|----------------|------------------------|------------------------------------------|----------------|----------------|
|                          | g <sub>x</sub> | g <sub>y</sub> | g <sub>z</sub> |                        | A <sub>x</sub>                           | A <sub>y</sub> | A <sub>z</sub> |
| <b>Cu<sup>II</sup>L1</b> | 2.0695         | 2.0789         | 2.1842         | 45.6                   | 14.53                                    | 11.51          | 197.8          |
| <b>Cu<sup>II</sup>L2</b> | 2.0695         | 2.0932         | 2.2022         | 39.7                   | 11.88                                    | 11.51          | 192.8          |
| <b>Cu<sup>II</sup>L3</b> | 2.0555         | 2.0555         | 2.2022         | 38.5                   | 13.62                                    | 13.62          | 192.8          |
| <b>Cu<sup>II</sup>L4</b> | 2.0494         | 2.0518         | 2.2063         | 44.2                   | 14.53                                    | 14.06          | 200.1          |
| <b>Cu<sup>II</sup>L5</b> | 2.0542         | 2.0537         | 2.2063         | 48.6                   | 14.53                                    | 14.06          | 197.0          |

**Table S10.** ESR parameters for the Cu<sup>II</sup>L2 and [Cu<sup>II</sup>L2(CH<sub>3</sub>OH)]ClO<sub>4</sub> of this work in methanol and methanol/water (80/20) mixture at 298 K.

| Complexes                                | Methanol       |                |                |                             | Methanol/Water (80:20) |                |                |                             |
|------------------------------------------|----------------|----------------|----------------|-----------------------------|------------------------|----------------|----------------|-----------------------------|
|                                          | g <sub>x</sub> | g <sub>y</sub> | g <sub>z</sub> | t <sub>corr</sub> ,<br>(ps) | g <sub>x</sub>         | g <sub>y</sub> | g <sub>z</sub> | t <sub>corr</sub> ,<br>(ps) |
| <b>Cu<sup>II</sup>L2 – 0<sup>a</sup></b> | 2.0082         | 2.0604         | 2.4230         | 18.8                        | 2.0388                 | 2.1059         | 2.3560         | 32.8                        |

|                                              |        |        |        |      |        |        |        |      |
|----------------------------------------------|--------|--------|--------|------|--------|--------|--------|------|
| <b>Cu<sup>II</sup>L2</b>                     | 2.0802 | 2.0783 | 2.1536 | 23.7 | 2.0758 | 2.0847 | 2.1513 | 44.9 |
| <b>[Cu<sup>II</sup>L2(CH<sub>3</sub>OH)]</b> | -      | -      | -      | -    | -      | -      | -      | -    |
| <b>ClO<sub>4</sub> – 0<sup>a</sup></b>       |        |        |        |      |        |        |        |      |
| <b>[Cu<sup>II</sup>L2(CH<sub>3</sub>OH)]</b> | 2.0627 | 2.0514 | 2.1969 | 66.0 | 2.0494 | 2.0419 | 2.2189 | 94.4 |
| <b>ClO<sub>4</sub></b>                       |        |        |        |      |        |        |        |      |

<sup>a</sup>Todimeric species.

**Table S11.** Maximum amount of ammonia formed by the complexes of this work under the conditions of acetonitrile/water and metanol/water mixture at 308 K.

| Compounds                | Urea concentration (mmol L <sup>-1</sup> ) Acetonitrile/water |                             |                             | Urea concentration (mmol L <sup>-1</sup> ) Acetonitrile/water |                            |                            |                            |
|--------------------------|---------------------------------------------------------------|-----------------------------|-----------------------------|---------------------------------------------------------------|----------------------------|----------------------------|----------------------------|
|                          | 5.2                                                           | 10.4                        | 15.6                        | 5.2                                                           | 10.4                       | 15.6                       | 20.8                       |
|                          | [Ammonia] <sub>max</sub> (μmol L <sup>-1</sup> )              |                             |                             |                                                               |                            |                            |                            |
| <b>Cu<sup>II</sup>L1</b> | 74.54 <sup>a</sup> ± 4.72                                     | 168.06 <sup>c</sup> ± 9.58  | -                           | -                                                             | -                          | -                          | -                          |
| <b>Cu<sup>II</sup>L2</b> | 70.68 <sup>b</sup> ± 9.61                                     | 185.73 <sup>c</sup> ± 6.51  | 270.90 <sup>a</sup> ± 9.76  | 42.88 <sup>g</sup> ± 7.75                                     | 111.16 <sup>g</sup> ± 3.32 | 129.95 <sup>e</sup> ± 3.31 | 203.28 <sup>g</sup> ± 3.51 |
| <b>Cu<sup>II</sup>L3</b> | 75.70 <sup>a</sup> ± 2.79                                     | 166.28 <sup>b</sup> ± 10.11 | 337.81 <sup>a</sup> ± 20.38 | -                                                             | -                          | -                          | -                          |
| <b>Cu<sup>II</sup>L4</b> | 69.99 <sup>a</sup> ± 6.08                                     | 156.05 <sup>a</sup> ± 0.49  | -                           | 41.56 <sup>f</sup> ± 6.04                                     | 113.09 <sup>g</sup> ± 3.26 | 137.32 <sup>g</sup> ± 4.82 | 209.67 <sup>g</sup> ± 5.37 |
| <b>Cu<sup>II</sup>L5</b> | 61.35 <sup>b</sup> ± 9.25                                     | 150.15 <sup>d</sup> ± 1.18  | -                           | -                                                             | -                          | -                          | -                          |

<sup>a</sup>5s. <sup>b</sup>10s. <sup>c</sup>20s. <sup>d</sup> 60s. <sup>e</sup> 120s. <sup>f</sup>240s. <sup>g</sup> 480s.

## Theoretical simulations

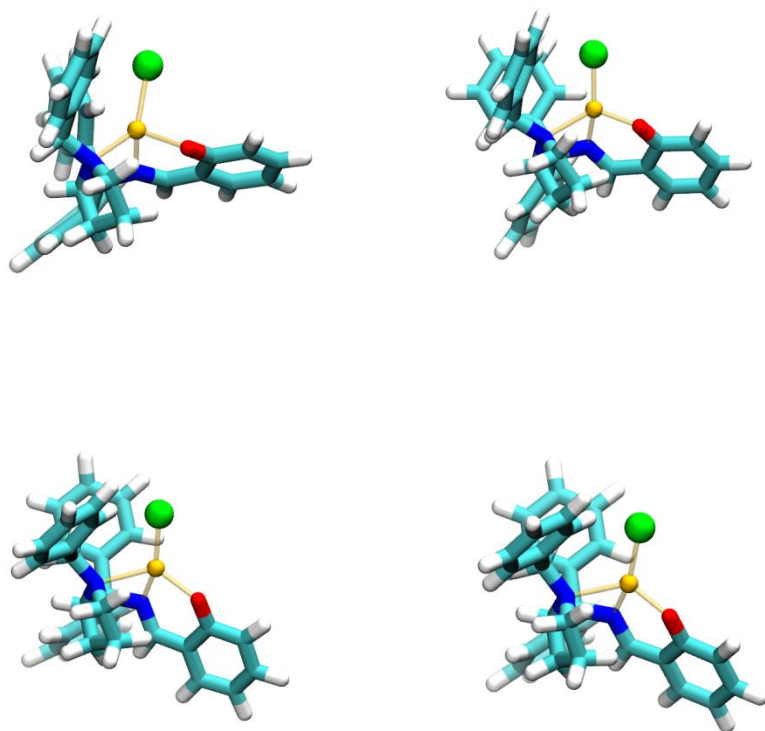

Figure S77 – Structures of the Cu<sup>II</sup>L1 monomer complex: initial structure (top left); structure obtained after first geometry optimization (top right); structure obtained after a 10 ps molecular dynamics run (bottom left) and structure obtained after final geometry optimization (bottom right). All calculations were performed considering the doublet multiplicity.

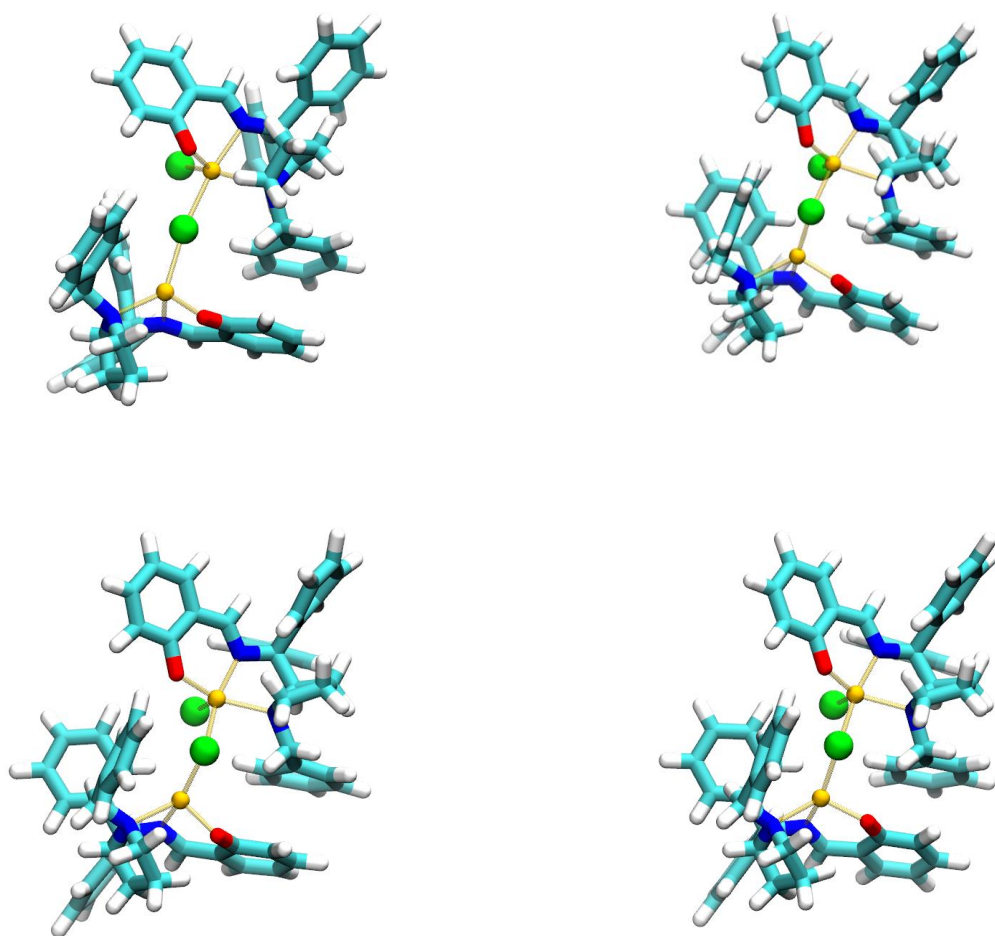

Figure S78 – Structures of the Cu<sup>II</sup>L1 dimer complex: initial structure (top left); structure obtained after first geometry optimization (top right); structure obtained after a 10 ps molecular dynamics run (bottom left) and structure obtained after final geometry optimization (bottom right). All calculations were performed considering the singlet multiplicity.

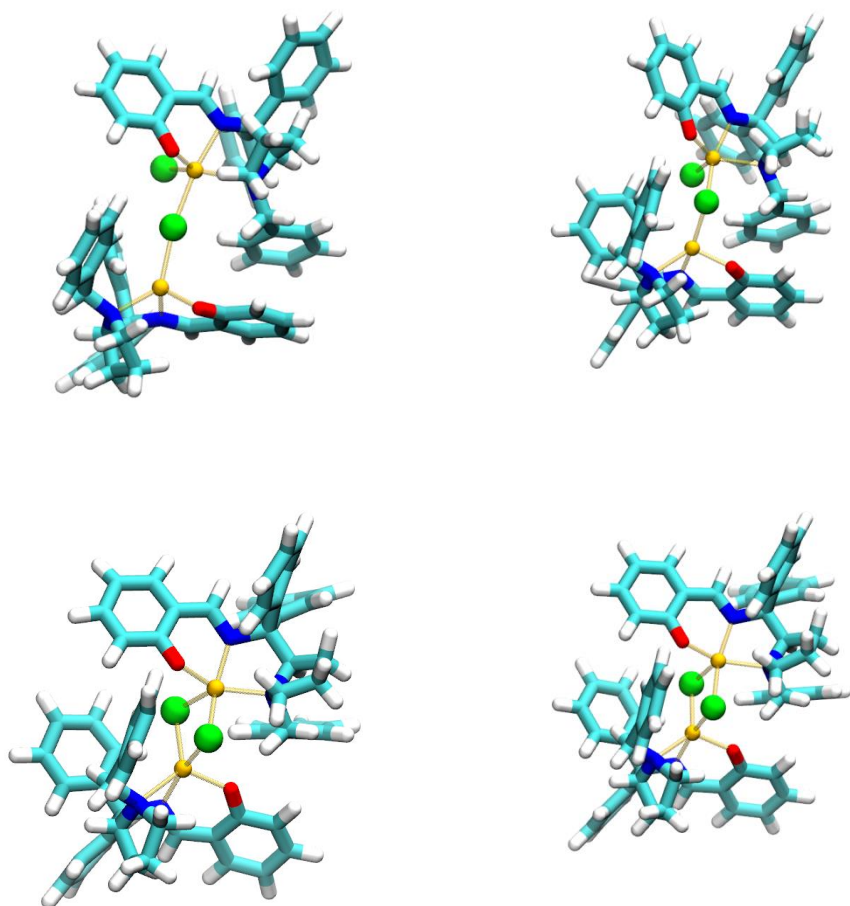

Figure S79 – Structures of the Cu<sup>II</sup>L1 dimer complex: initial structure (top left); structure obtained after first geometry optimization (top right); structure obtained after a 10 ps molecular dynamics run (bottom left) and structure obtained after final geometry optimization (bottom right). All calculations were performed considering the triplet multiplicity.

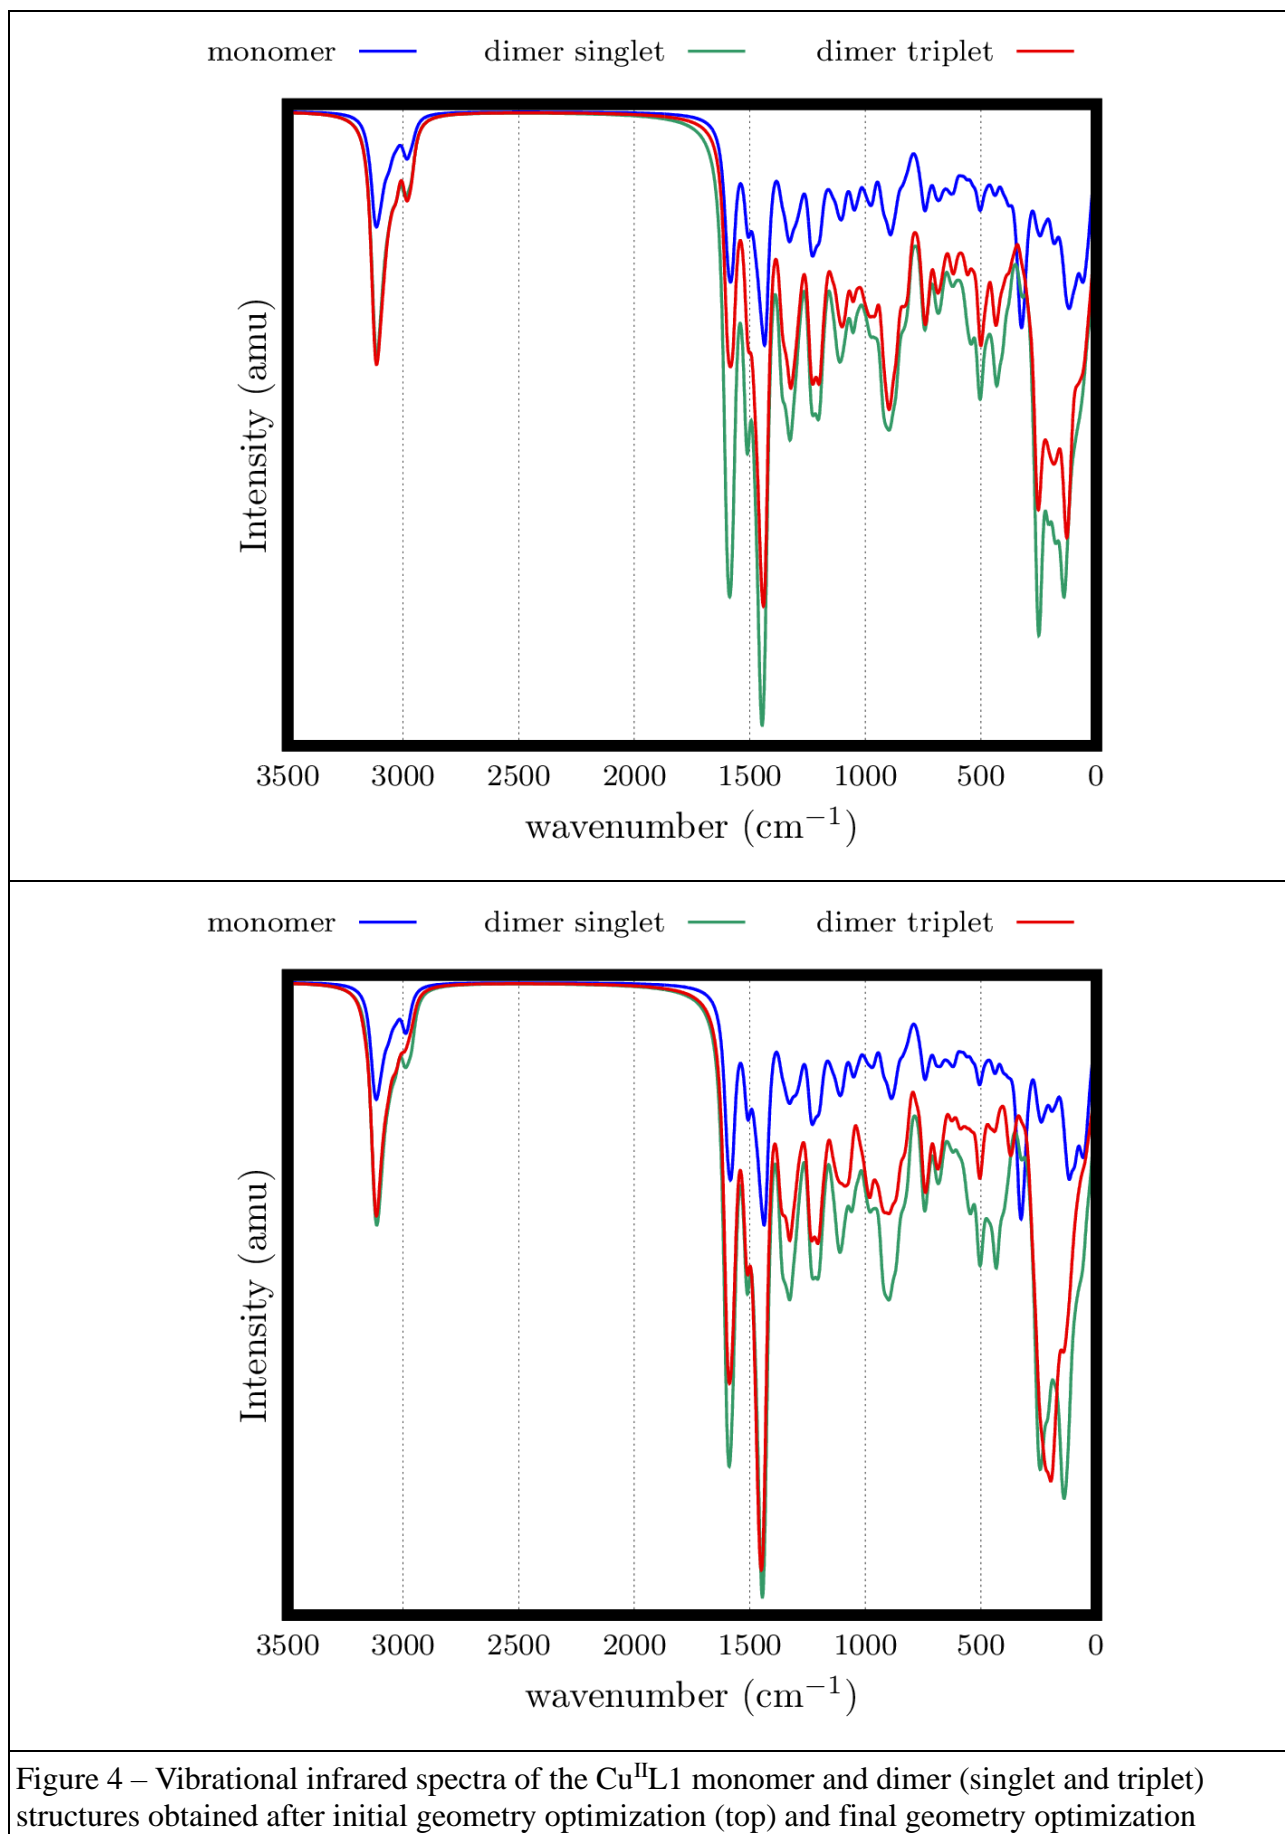

Figure 4 – Vibrational infrared spectra of the Cu<sup>II</sup>L1 monomer and dimer (singlet and triplet) structures obtained after initial geometry optimization (top) and final geometry optimization

(bottom).

Association thermodynamics of different solvent molecules into these complexes were studied by means of a configurational phase space sampling using Themis software as follows:

i) complex structures optimized as described before were used as the reference molecule;

ii) a translation grid was build around the solvent-accessible-surface (SAS) area of these structures considering the vdw radii of each atom plus a 1.2 Å probing radius.

iii) since previous calculations considering the grid around the whole molecule resulted in hot spots near the metallic center, only points within 5.0 Å of  $\text{Cu}^{2+}$  and  $\text{Cl}^-$  were considered;

iv) a reference atom of the second molecule (Tref) was placed in each grid point in turn;

v) a second reference atom of the second molecule (Rref) originates its rotation axis: this axis will perform Nrot1 rotations around the grid point and the whole molecule will perform Nrot2 rotations around such axis;

vi) this succession of moves resulted in  $N_{\text{trans}} \times N_{\text{rot1}} \times N_{\text{rot2}} = N_{\text{conf}}$  independent structures of solvent molecule around the complex;

vii) in order to reduce the number of structures, configurations that presented intermolecular distances below 1.6 Å are considered invalid: a highly repulsive interaction energy value ( $10^6$  kJ/mol) is assigned to such structure;

viii) cartesian coordinates of all valid structures were written in ordered files;

ix) a total of  $N_{\text{sp}}$  single-point calculations at the GFN1-xTB level were then performed considering the same convergence criteria described below (SCC and WF convergence, electronic temperature);

x) interaction energy for each  $i$ -th microstate was obtained by

$$E_{inter} = E_i - E_{far}$$

where  $E_i$  corresponds to the total energy of the  $i$ -th microstate and  $E_{far}$  corresponds to the total energy of the given solvent molecule nearly 100 Å apart of the complex.

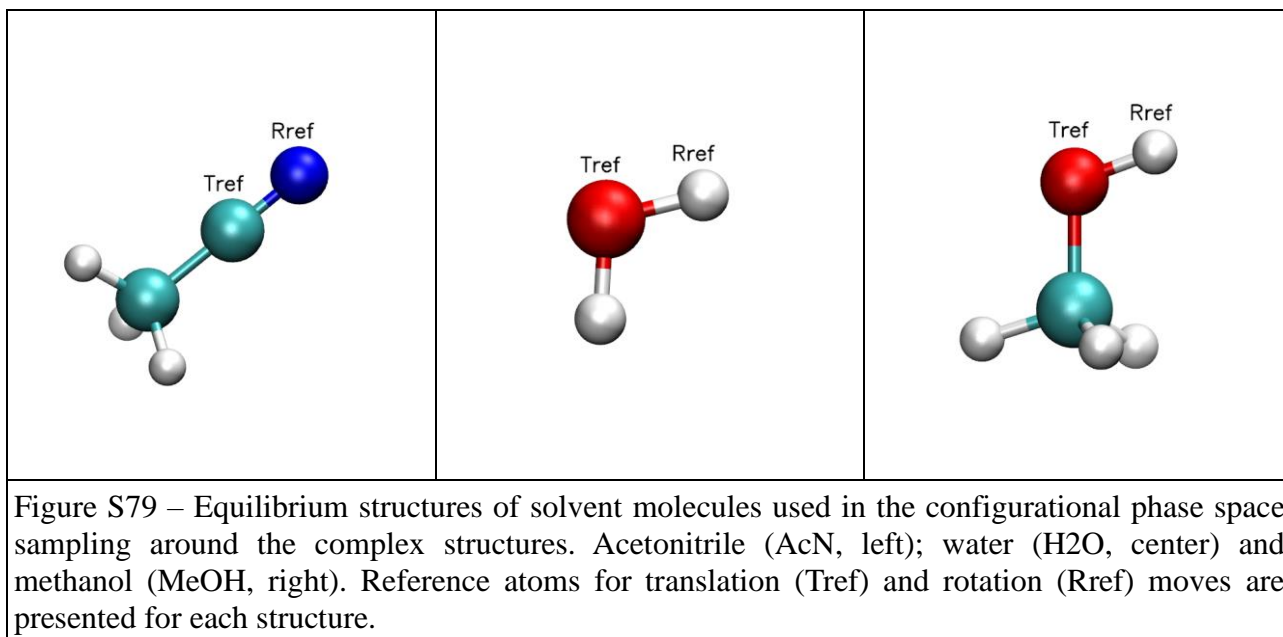

| Complex      | Molecule         | multiplicity | Ntrans | Nrot1 | Nrot2 | Nconf   | Nsp     |
|--------------|------------------|--------------|--------|-------|-------|---------|---------|
| monomer      | AcN              | doublet      | 145    | 42    | 12    | 73080   | 39469   |
|              | H <sub>2</sub> O | doublet      | 145    | 42    | 36    | 219240  | 199968  |
|              | MeOH             | doublet      | 145    | 42    | 36    | 219240  | 125285  |
| dimer        | AcN              | singlet      | 153    | 42    | 12    | 77112   | 35180   |
|              | H <sub>2</sub> O | singlet      | 153    | 42    | 36    | 231336  | 202726  |
|              | MeOH             | singlet      | 153    | 42    | 36    | 231336  | 115162  |
|              | AcN              | triplet      | 154    | 42    | 12    | 77616   | 32147   |
|              | H <sub>2</sub> O | triplet      | 154    | 42    | 36    | 232848  | 198939  |
|              | MeOH             | triplet      | 154    | 42    | 36    | 232848  | 104412  |
| Total number |                  |              |        |       |       | 1594656 | 1053288 |

Although the manuscript describing the Themis program is still under submission[67], this methodology was effectively used to sample the surface of a CdTe nanoparticle functionalized with cysteine molecules and find the preferential binding sites of the four DNA nucleobases using the PM7 Hamiltonian implemented in MOPAC 2016 software[68]. More recently, it was shown that free energy surfaces of first coordination shell of ion pairs of ionic liquids obtained at DFT level produces results in excellent agreement with the ones obtained from liquid phase MD simulations [69,70] demonstrating that even in some complex cases, Themis is able to probe the structure of condensed phases. It was also possible to study the interaction of carbon nitride sheets in order to build a multilayer structure and its further interaction with different cations to build a single-cation catalyst[71] using quantum chemistry energies from the GFN1-xTB Hamiltonian implemented in xTB 6.2 software.

### **Results for Monomer/molecules**

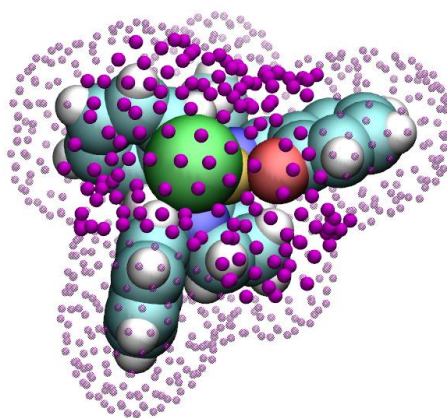

translation grid points near  $\text{Cu}^{2+}$  and  $\text{Cl}^-$  ions

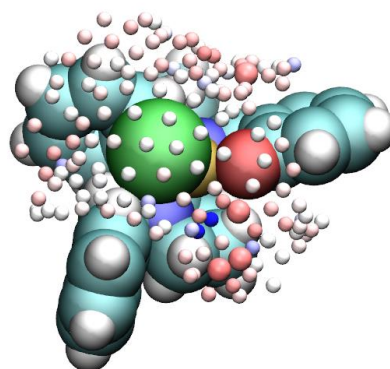

free energy landscape for AcN

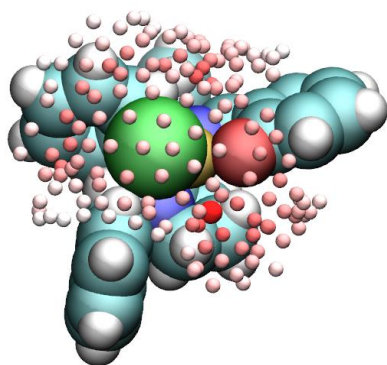

free energy landscape for  $\text{H}_2\text{O}$

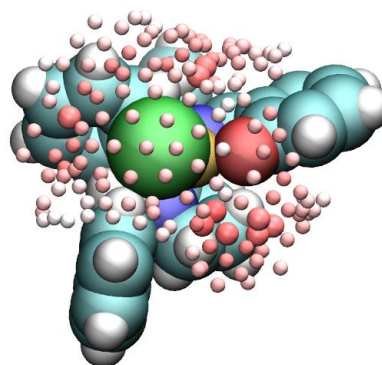

free energy landscape for MeOH

Figure S80 – Translation grid along surface accessible area (SAS) of the monomeric complex (transparent purple spheres). Points within 5.0 Å of  $\text{Cu}^{2+}$  or  $\text{Cl}^-$  ions are highlighted (opaque purple spheres) and were used to sample the surface (top left). Free energy landscapes obtained at the GFN1-xTB level: AcN molecule (top right);  $\text{H}_2\text{O}$  molecule (bottom left) and MeOH molecule (bottom right). Colorscale for the landscapes correspond to free energy values ranging from  $-32$  kJ/mol (dark red) to  $+32$  kJ/mol (dark blue). While color correspond to 0 kJ/mol.

As one can observe, each solvent molecule binds preferentially to different region of the complex. Free energy landscapes indicate the hot spots where such adsorption is preferential. In these representations, we highlight the grid points that correspond to a cumulative probability of approximately 50 % (bigger grid spheres). Thus, free energy landscape for ACN presented 4 translation points that amount to a 51.57 % probability, with free energy values ranging from  $-19.90$  kJ/mol ( $p = 19.39$  %) to  $-17.51$  kJ/mol ( $p = 7.44$  %). While the landscape for  $\text{H}_2\text{O}$  molecule the most

probable translation point amounts to a 68.62 % probability alone (with a free energy value of  $-31.18$  kJ/mol), MeOH landscape presented a more spread probability in which the 9 most probable translation points amounted to a 52.31 % probability, with free energy values ranging from  $-23.06$  kJ/mol ( $p = 12.28$  %) to  $-19.55$  kJ/mol ( $p = 2.99$  %).

After the full thermodynamic sampling and analysis performed by Themis, the most probable complex/molecule structures within the ensemble are written out for further analysis. At this point it is interesting to notice that although thousands of structures were sampled, only a few presented noticeable probabilities. For instance, the 50 most probable monomer/AcN structures amounted to a cumulative probability of 38.95 %, with interaction energies ranging from  $-29.79$  kJ/mol ( $p = 2.03$  %) to  $-25.89$  kJ/mol ( $p = 0.42$  %). Similarly, considering monomer/H<sub>2</sub>O structures, the 18 most probable structures amounted to a cumulative probability of 50.95 %, with interaction energy values ranging from  $-43.99$  kJ/mol ( $p = 7.73$  %) to  $-38.96$  kJ/mol ( $p = 1.03$  %). On the other hand, considering monomer/MeOH structures, even taking the 50 most probable structures amount to “only” 26.49 %, with interaction energies ranging from  $-36.99$  kJ/mol ( $p = 2.15$  %) to  $-31.07$  % ( $p = 0.20$  %).

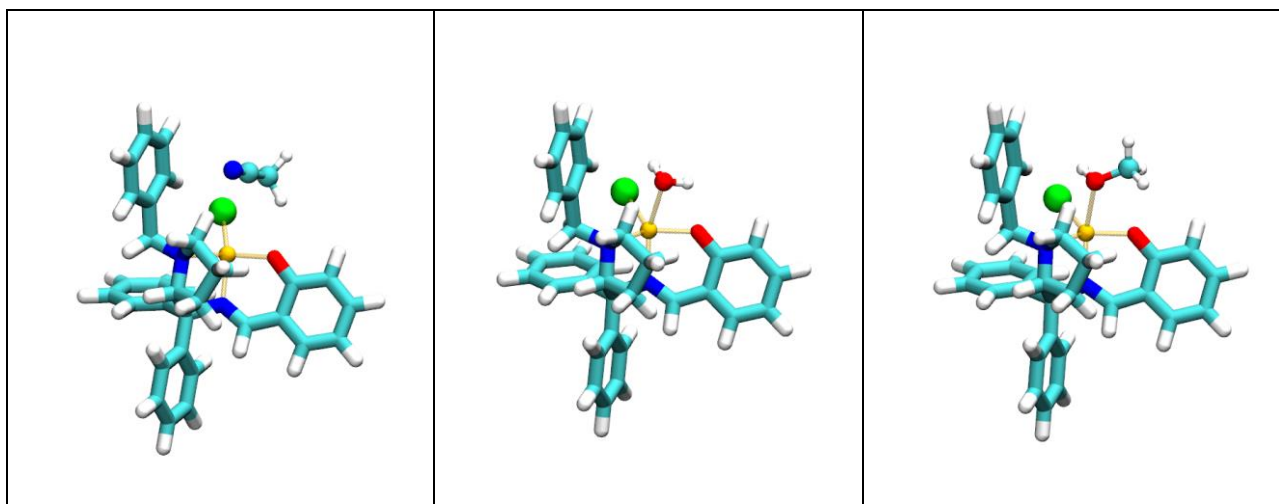

Figure 81 – Most probable complex/molecule structures after Themis search followed by a full geometry optimization: monomer/AcN (left); monomer/H<sub>2</sub>O (center) and monomer/MeOH (right).

## Results for Dimer (singlet)/molecules

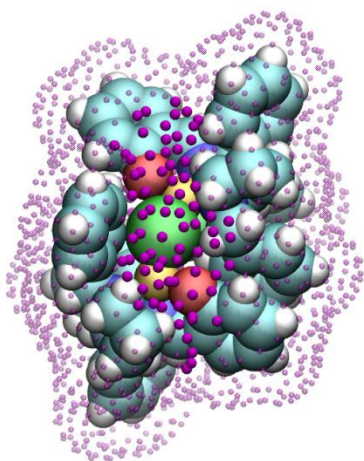

translation grid points near Cu<sup>2+</sup> and Cl<sup>-</sup> ions

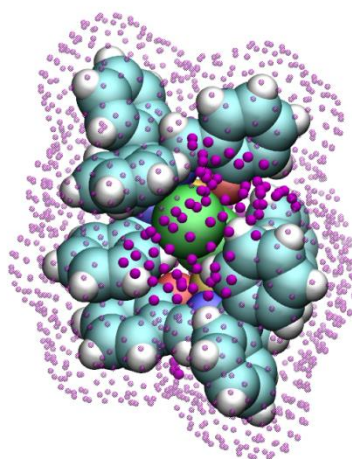

translation grid points near Cu<sup>2+</sup> and Cl<sup>-</sup> ions

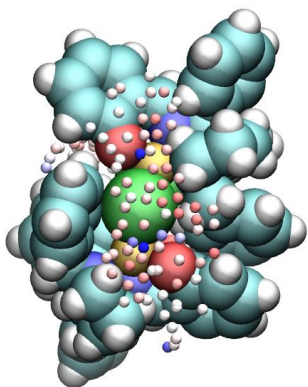

free energy landscape for CAN

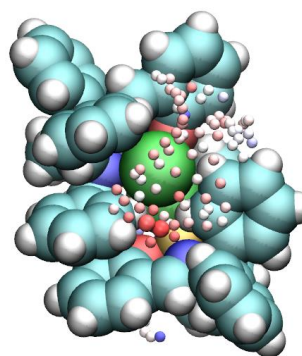

free energy landscape for ACN

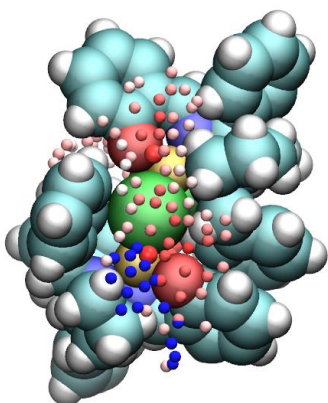

free energy landscape for H<sub>2</sub>O

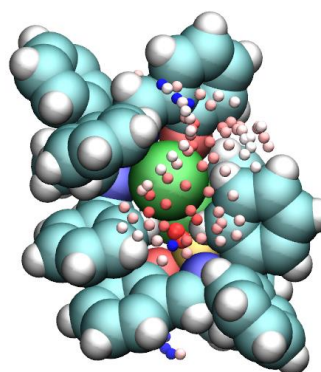

free energy landscape for H<sub>2</sub>O

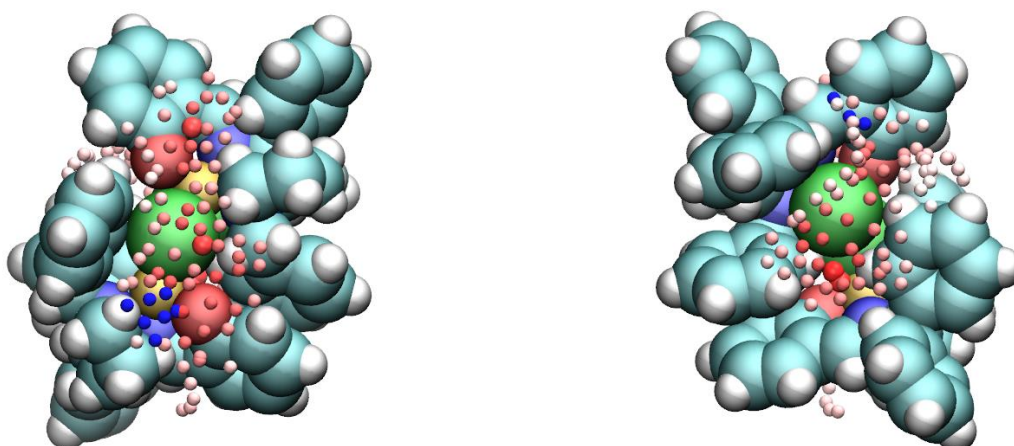

free energy landscape for MeOH

free energy landscape for MeOH

Figure S81 – Translation grid along surface accessible area (SAS) of the dimeric complex (transparent purple spheres) at singlet state. Points within 5.0 Å of  $\text{Cu}^{2+}$  or  $\text{Cl}^-$  ions are highlighted (opaque purple spheres) and were used to sample the surface (first row). Free energy landscapes obtained at the GFN1-xTB level: AcN molecule (second row);  $\text{H}_2\text{O}$  molecule (third row) and MeOH molecule (fourth row). Colorscale for the landscapes correspond to free energy values ranging from  $-32$  kJ/mol (dark red) to  $+32$  kJ/mol (dark blue). While color correspond to 0 kJ/mol.

Free energy landscape for ACN presented 2 translation points that amount to a 55.31 % probability, with free energy values ranging from  $-25.81$  kJ/mol ( $p = 41.17$  %) to  $-23.14$  kJ/mol ( $p = 14.14$  %).

Free energy landscape for  $\text{H}_2\text{O}$  presented 4 translation points that amount to a 52.04 % probability, with free energy values ranging from  $-28.91$  kJ/mol ( $p = 15.14$  %) to  $-27.71$  kJ/mol ( $p = 9.35$  %).

Free energy landscape for MeOH presented 4 translation points that amount to a 50.91 % probability, with free energy values ranging from  $-30.02$  kJ/mol ( $p = 24.81$  %) to  $-26.10$  kJ/mol ( $p = 5.15$  %).

The 50 most probable dimer (singlet)/ACN structures amounted to a cumulative probability of 55.56 %, with interaction energies ranging from  $-36.03$  kJ/mol ( $p = 4.92$  %) to  $-28.87$  kJ/mol ( $p = 0.28$  %).

The 50 most probable dimer (singlet)/H<sub>2</sub>O structures amounted to a cumulative probability of 23.73 %, with interaction energies ranging from  $-41.63$  kJ/mol ( $p = 1.64$  %) to  $-36.97$  kJ/mol ( $p = 0.25$  %).

The 50 most probable dimer (singlet)/MeOH structures amounted to a cumulative probability of 43.21 %, with interaction energies ranging from  $-42.36$  kJ/mol ( $p = 2.31$  %) to  $-37.23$  kJ/mol ( $p = 0.30$  %).

### **Results for Dimer (triplet)/molecules**

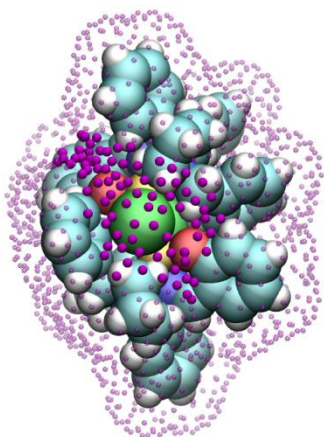

translation grid points near  $\text{Cu}^{2+}$  and  $\text{Cl}^-$  ions

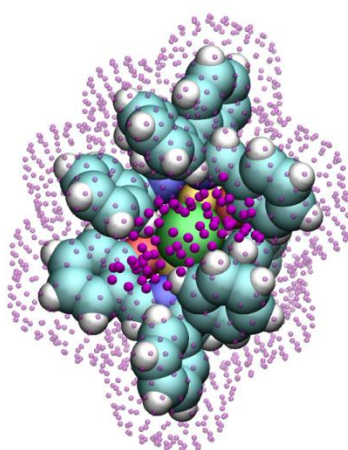

translation grid points near  $\text{Cu}^{2+}$  and  $\text{Cl}^-$  ions

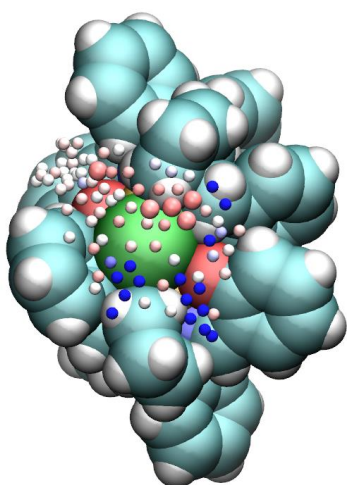

free energy landscape for can

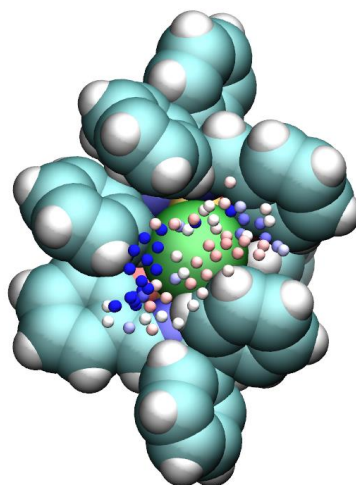

free energy landscape for AcN

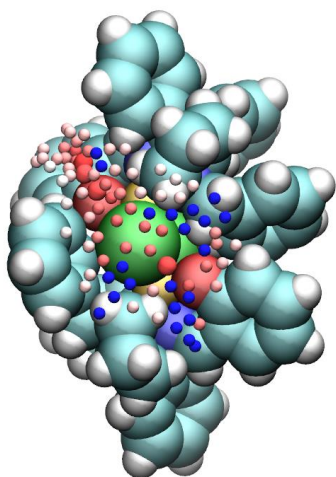

free energy landscape for H2O

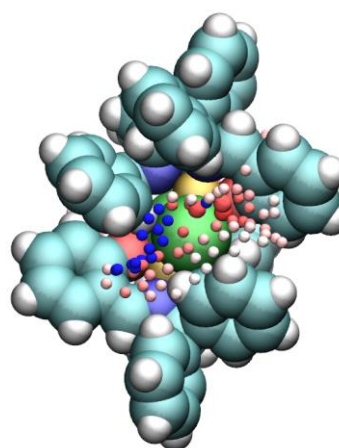

free energy landscape for H2O

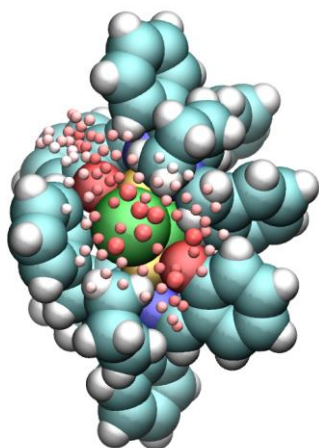

free energy landscape for MeOH

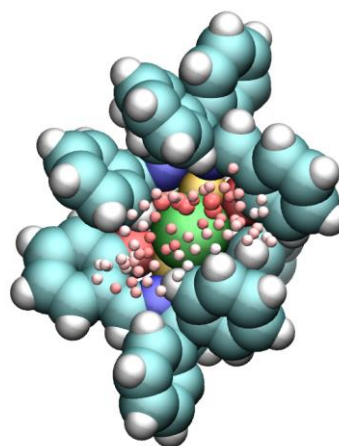

free energy landscape for MeOH

Figure S82 – Translation grid along surface accessible area (SAS) of the dimeric complex (transparent purple spheres) at triplet state. Points within 5.0 Å of  $\text{Cu}^{2+}$  or  $\text{Cl}^-$  ions are highlighted (opaque purple spheres) and were used to sample the surface (first row). Free energy landscapes obtained at the GFN1-xTB level: AcN molecule (second row);  $\text{H}_2\text{O}$  molecule (third row) and MeOH molecule (fourth row). Colorscale for the landscapes correspond to free energy values ranging from  $-32$  kJ/mol (dark red) to  $+32$  kJ/mol (dark blue). While color correspond to 0 kJ/mol.

Free energy landscape for ACN presented 5 translation points that amount to a 51.46 % probability, with free energy values ranging from  $-18.69$  kJ/mol ( $p = 14.22$  %) to  $-16.36$  kJ/mol ( $p = 5.58\%$ ).

Free energy landscape for  $\text{H}_2\text{O}$  presented 7 translation points that amount to a 53.25 % probability, with free energy values ranging from  $-26.99$  kJ/mol ( $p = 13.74$  %) to  $-23.89$  kJ/mol ( $p = 3.97$  %).

Free energy landscape for MeOH presented 12 translation points that amount to a 51.95 % probability, with free energy values ranging from  $-24.47$  kJ/mol ( $p = 8.66$  %) to  $-21.58$  kJ/mol ( $p = 2.84$  %).

The 50 most probable dimer (triplet)/AcN structures amounted to a cumulative probability of 42.24 %, with interaction energies ranging from  $-29.29$  kJ/mol ( $p = 1.97$  %) to  $-24.46$  kJ/mol ( $p = 0.29$  %).

The 50 most probable dimer (triplet)/ $\text{H}_2\text{O}$  structures amounted to a cumulative probability of 15.38 %, with interaction energies ranging from  $-37.11$  kJ/mol ( $p = 0.52$  %) to  $-34.63$  kJ/mol ( $p = 0.19$  %).

The 50 most probable dimer (triplet)/MeOH structures amounted to a cumulative probability of 21.74 %, with interaction energies ranging from  $-37.89$  kJ/mol ( $p = 1.30$  %) to  $-33.81$  kJ/mol ( $p = 0.25$  %).

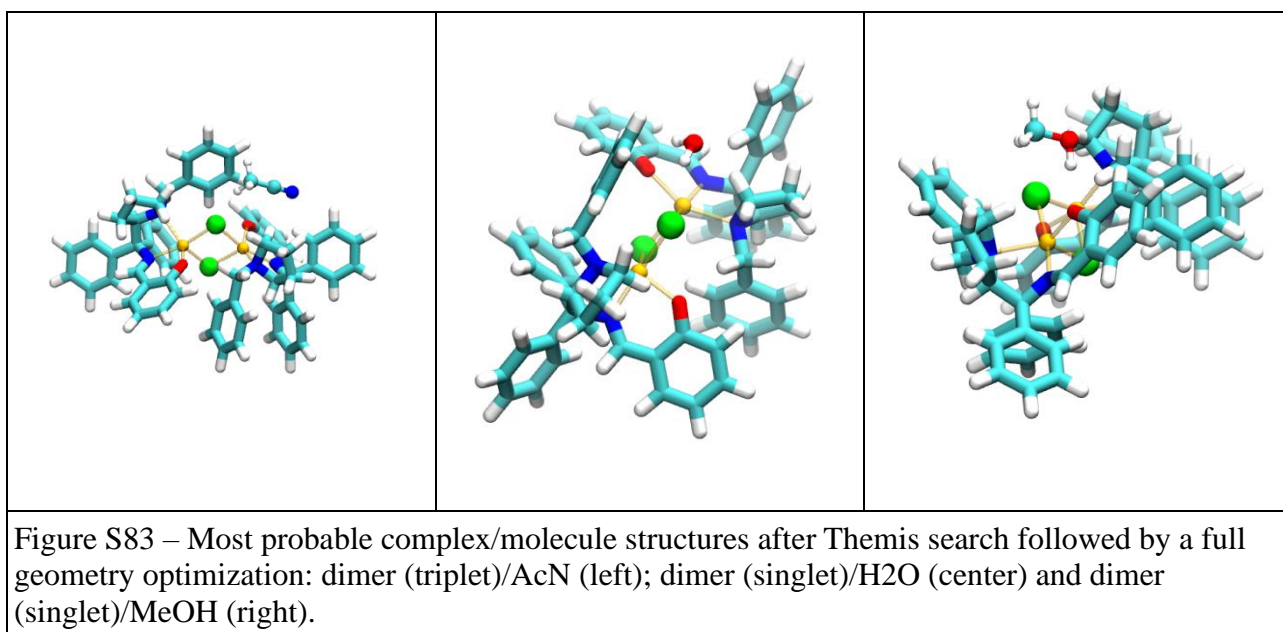

**Table S12.** Thermochemical data obtained from the DFT calculations of the Cu<sup>II</sup>L1 monomer or dimer interacting with a single solvent molecule. Spin multiplicity is indicated for each complex and the stabilization energies (in kJ/mol) amount to the difference between the most stable singly-solvated complex and the energies of the separated solvent molecule and complex.

| ACN                                   |       |
|---------------------------------------|-------|
| Cu <sup>II</sup> L1 monomer (doublet) | -33.1 |
| Cu <sup>II</sup> L1 dimer (singlet)   | -41.9 |
| Cu <sup>II</sup> L1 dimer (triplet)   | -35.9 |
| H <sub>2</sub> O                      |       |
| Cu <sup>II</sup> L1 monomer (doublet) | -57.2 |
| Cu <sup>II</sup> L1 dimer (singlet)   | -50.4 |
| Cu <sup>II</sup> L1 dimer (triplet)   | -47.0 |
| MeOH                                  |       |

|                                       |       |
|---------------------------------------|-------|
| Cu <sup>II</sup> L1 monomer (doublet) | -54.1 |
| Cu <sup>II</sup> L1 dimer (singlet)   | -49.6 |
| Cu <sup>II</sup> L1 dimer (triplet)   | -44.0 |

## References

67. Colombari, F. M., Bernardino, K., Gomes, W. R., Lozada-Blanco, A., Moura, A. F. Themis: a Software to Assess Association Free Energies Via Direct Estimative of Partition Functions. Unpublished.
68. Sun, M.; Xu, L.; Qu, A.; Zhao, P.; Hao, T.; Ma, W.; Hao, C.; Wen, X.; Colombari, F. M.; de Moura, A. F.; Kotov, N. A.; Xu, C.; Kuang, H. Site-selective photoinduced cleavage and profiling of DNA by chiral semiconductor nanoparticles. *Nature Chemistry***2018**, 10, 821–830.
69. Bernardino, K.; Lima, T. A.; Ribeiro, M. C. C. Low-Temperature Phase Transitions of the Ionic Liquid 1-Ethyl-3-methylimidazolium Dicyanamide. *The Journal of Physical Chemistry B***2019**, 123, 9418–9427.
70. Bernardino, K.; Goloviznina, K.; Gomes, M. C.; Pádua, A. A. H.; Ribeiro, M. C. C. Ion pair free energy surface as a probe of ionic liquid structure. *The Journal of Chemical Physics***2020**, 152, 014103.
71. Colombari, F. M.; da Silva, M. A. R.; Homsí, M.; Souza, B. R. L.; Araujo, M.; Francisco, J. L.; Silva, G. T. S. T.; Silva, I. F.; de Moura, A. F.; Teixeira, I. F. Graphitic Carbon Nitrides as Platforms for Single-Atom Photocatalysis. *Faraday Discussions***2020**, Accepted Manuscript.
